# Supplementary material for: ESRP1-regulated isoform switching of LRRFIP2 determines metastasis of gastric cancer
Source: PubMed Central journal article supplement (PMC9616898; doi:10.1038/s41467-022-33786-9), 2022-10-28
Supplement: 41467_2022_33786_MOESM1_ESM.pdf [file 41467_2022_33786_MOESM1_ESM.pdf]

Supplementary Fig. 1

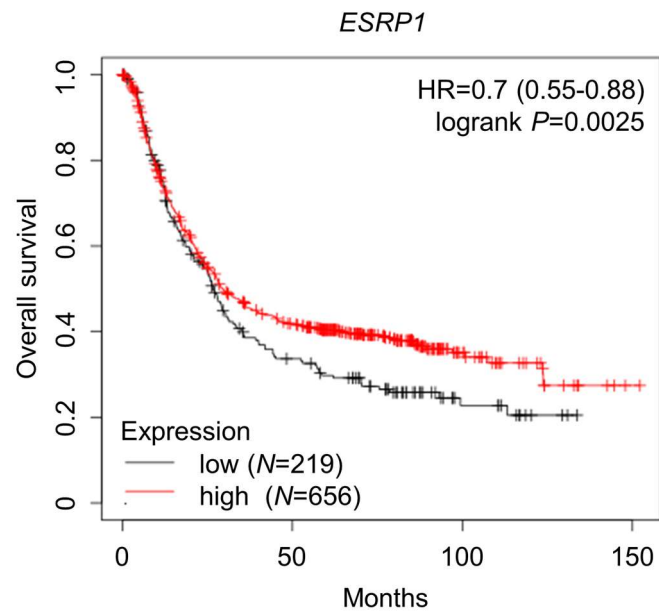

**Supplementary Fig. 1.** *ESRP1* expression is positively correlated with the overall survival times of gastric cancer patients. Kaplan-Meier analysis showing overall survival depending on *ESRP1* expression levels from public meta-analysis data ( $N=875$ ).  $P$  values were calculated using a log-rank test.

## Supplementary Fig. 2

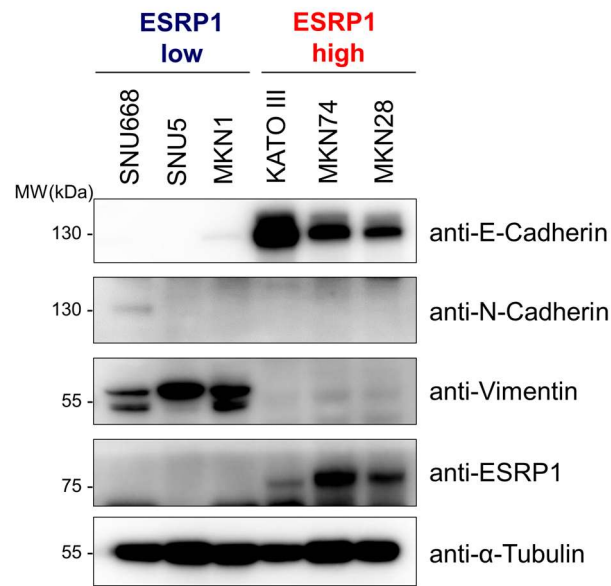

**Supplementary Fig. 2. ESRP1 expression is correlated with the expression of EMT markers in gastric cancer cells.** Immunoblot analysis of EMT markers in ESRP1-low gastric cancer cell lines (SNU668, SNU5 and MKN1) and ESRP1-high gastric cancer cell lines (KATOIII, MKN74 and MKN28). The representative results were obtained from at least two independent experiments.

## Supplementary Fig. 3

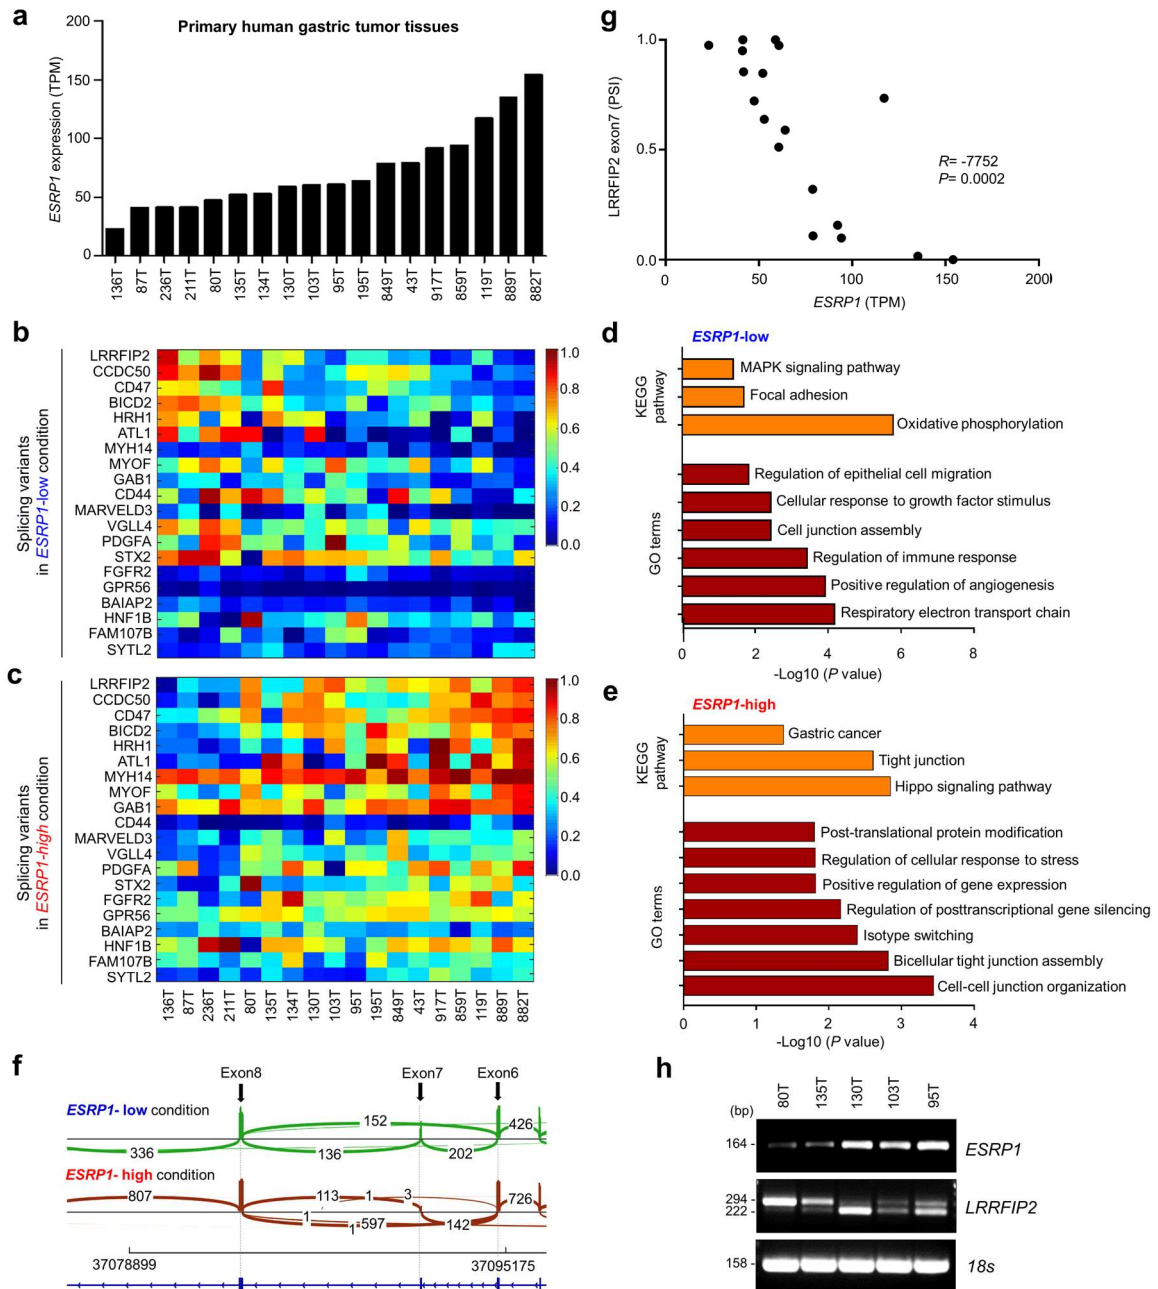

**Supplementary Fig. 3. The relative frequencies of *LRRFIP2* splicing are significantly associated with the expression levels of *ESRP1* in gastric cancer patient tissues.** **a** Bar graph showing the expression levels of *ESRP1* differentially expressed in the gastric cancer tissues. **b, c** Heatmaps illustrating relative TPM of 20 splicing variants alternatively expressed in **b** *ESRP1*-low and **c** -high conditions. **d, e** KEGG pathways and GO terms enriched in differentially expressed genes upregulated in **b** and **c**. **f** Sashimi plots indicate exon usage and splicing of *LRRFIP2* in *ESRP1*-low and -high conditions. Arches and numbers represent RNA-seq reads at exon-exon junctions. **g** Pearson's correlation analysis between the PSI value of *LRRFIP2* exon 7 and *ESRP1* expression (TPM) in 18 patient tissue samples ( $R = -0.7724$ ,  $P = 0.0002$ ). **h** RT-PCR result showing expression levels of *LRRFIP2* variant 2 and variant 3 in gastric cancer tissues each with low or high expression level of *ESRP1*. The representative results were obtained from at least two independent experiments. Source data are provided in the Source Data file.

## Supplementary Fig. 4

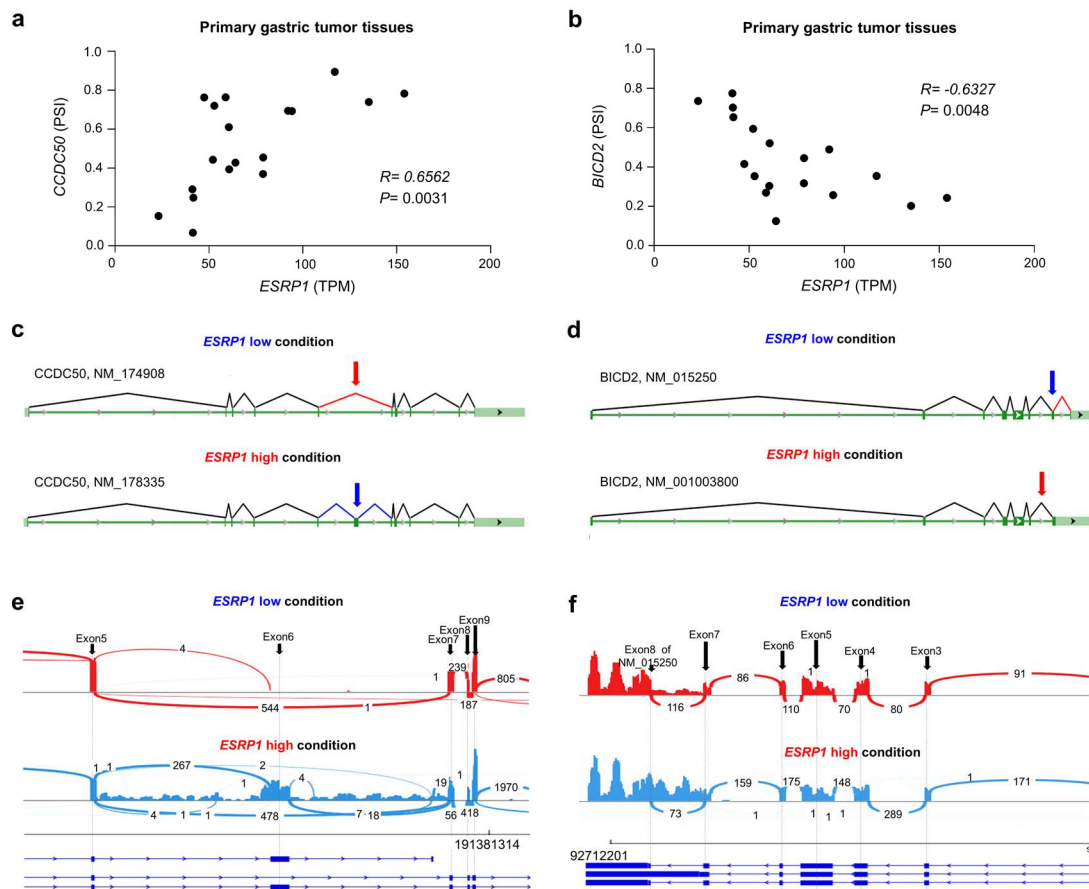

**Supplementary Fig. 4. Splicing variants of CCDC50 and BICD2 differentially display exon skipping events in ESRP1-low and ESRP1-high conditions.** **a** Pearson's correlation analysis between the PSI of *CCDC50* (NM\_178335) exon 6 in the association of *ESRP1*(TPM) from **Supplementary Fig. 2b** and **c** ( $R=0.6562$ ,  $P=0.0031$ ). **b** Pearson's correlation analysis between the PSI of *BICD2* (NM\_015250) exon 8 in the association of *ESRP1*(TPM) from **Supplementary Fig. 2b** and **c** ( $R=-0.6327$ ,  $P=0.0048$ ). **c**, **d** Schematic representation of human *c* *CCDC50* and **d** *BICD2* isoforms differentially expressed in ESRP1-low condition and ESRP1-high condition. The arrows point at the exons whose alternative splicing frequencies are associated with the expression level of ESRP1. **e**, **f** Sashimi plots indicate exon usage and splicing of **e** *CCDC50* and **f** *BICD2* in ESRP1-low and -high conditions. Arches and numbers represent RNA-seq reads at exon-exon junctions. Source data are provided in the Source Data file.

## Supplementary Fig. 5

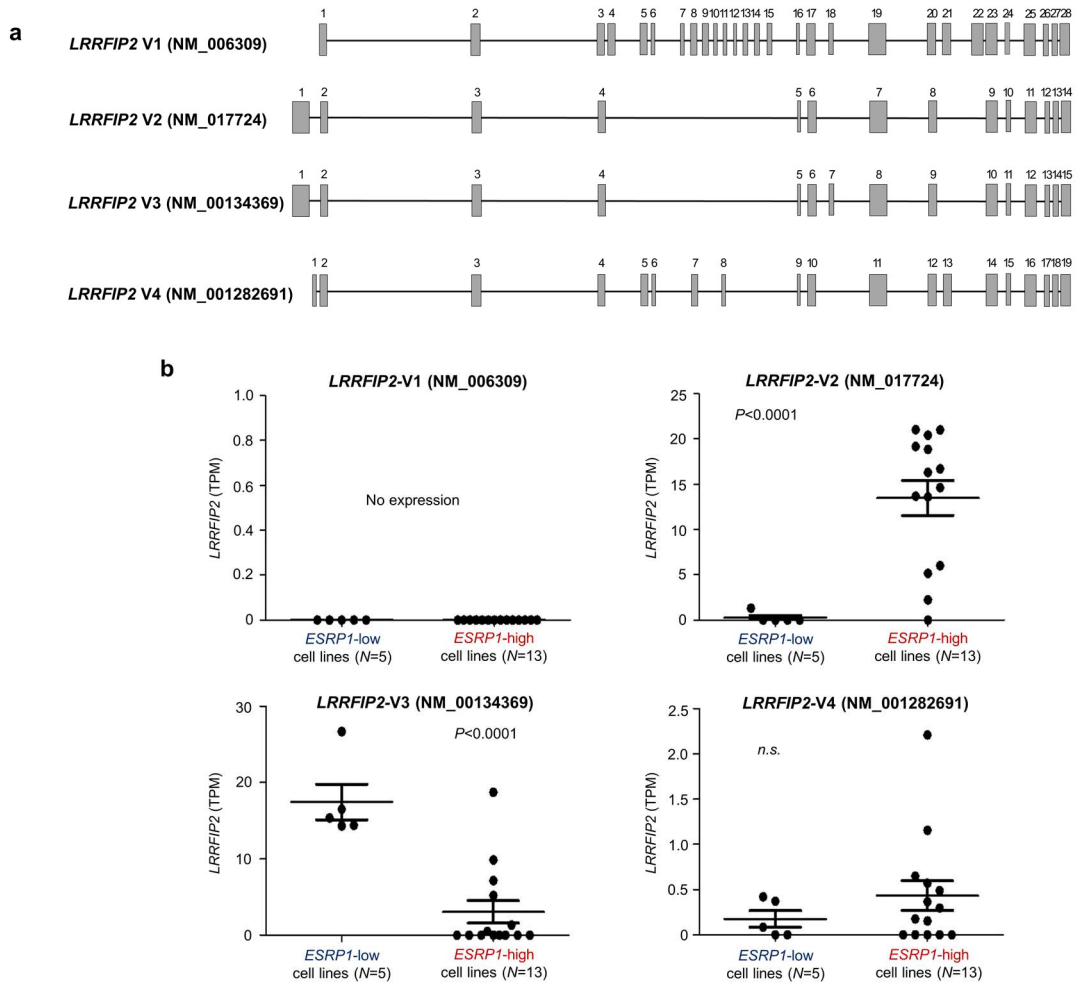

**Supplementary Fig. 5. LRRFIP2 variants 2 and 3 are highly expressed in the 18 gastric cell lines and their expression levels are significantly correlated with those of ESRP1.** **a** Schematic representation of four variants of LRRFIP2. Grey boxes represent exons. **b** Dotplot derived from TPM profiles of four alternatively spliced isoforms under ESRP1-low condition (N=5) and ESRP1-high condition (N=13) from **Fig. 1b** and **c**. All P values were calculated by unpaired two-tailed Student's t tests. These data represent the mean  $\pm$  S.D. Source data are provided in the Source Data file.

Supplementary Fig. 6

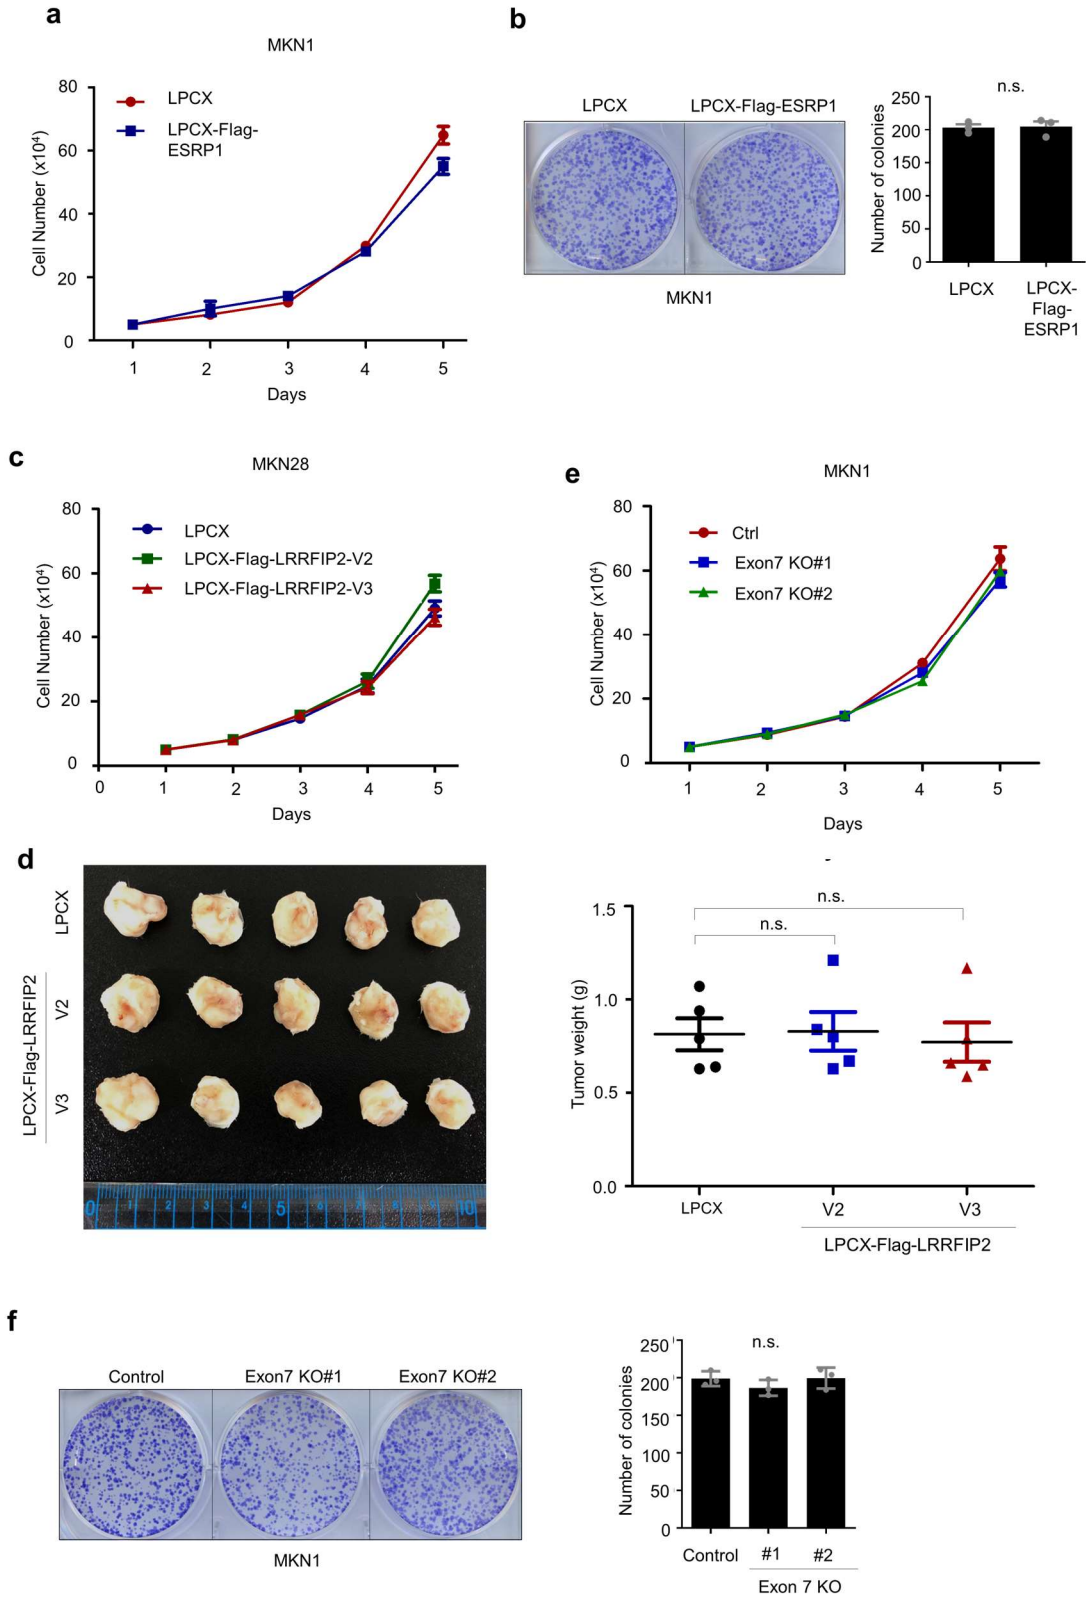

**Supplementary Fig. 6. Overexpression of ESRP1 or splicing switch of LRRFIP2 does not alter tumorigenicity of gastric cancer cells.** **a** Cell doubling times of control and ESRP1-overexpressing MKN1 cells. Each point represents the mean of cell numbers counted in triplicate dishes. **b** Foci formation of control and ESRP1-overexpressing MKN1 cells. **c** Cell doubling times of control and LRRFIP2 variants 2 and 3-overexpressing MKN28 cells. **d** Tumor formation and growth of control and LRRFIP2 variants 2 and 3-overexpressing MKN28 cells subcutaneously injected into the flanks of immunodeficient mice (n=6). Representative primary tumor images (left) and tumor weights (right) are shown. **e** Cell doubling times of control and exon 7-deleted MKN1 cells. **f** Foci formation of control and exon 7-deleted MKN1 cells. **a-b, e, f** Data represent the mean  $\pm$ SD of three independent experiments. **d** Data are representative mean  $\pm$  SD of five independent animals (n = 5). All *P* values were calculated by unpaired two-tailed Student's *t* tests. n.s.: not significant. Source data are provided in the Source Data file.

## Supplementary Fig. 7

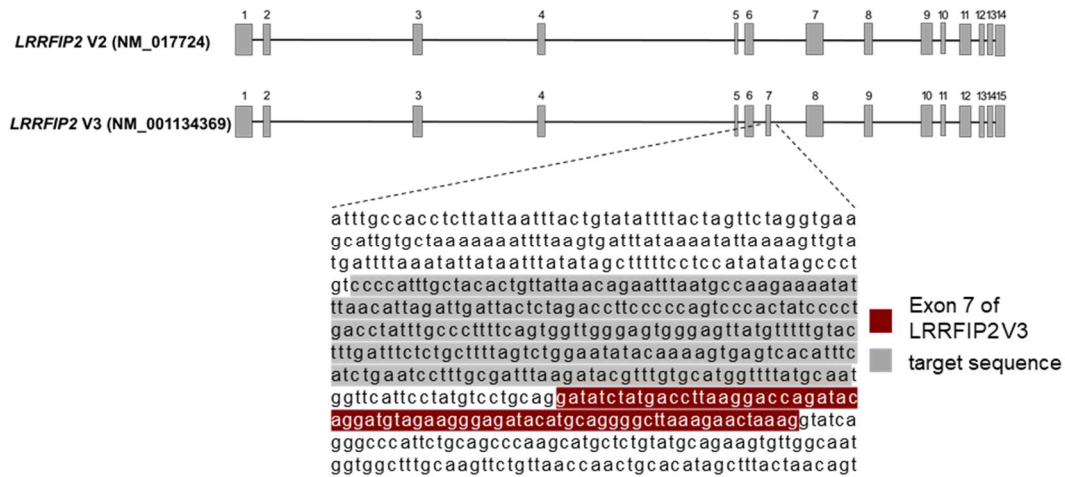

**Supplementary Fig. 7. ESRP1 directly binds LRRFIP2 transcript in MKN28 cells.** Schematic representation and nucleotide sequence of ESRP1-binding site within LRRFIP2 variant. Red box represents exon 7 of LRRFIP2 V3 and grey box represents the targeted sequence in **Fig. 2c**.



## Supplementary Fig. 8

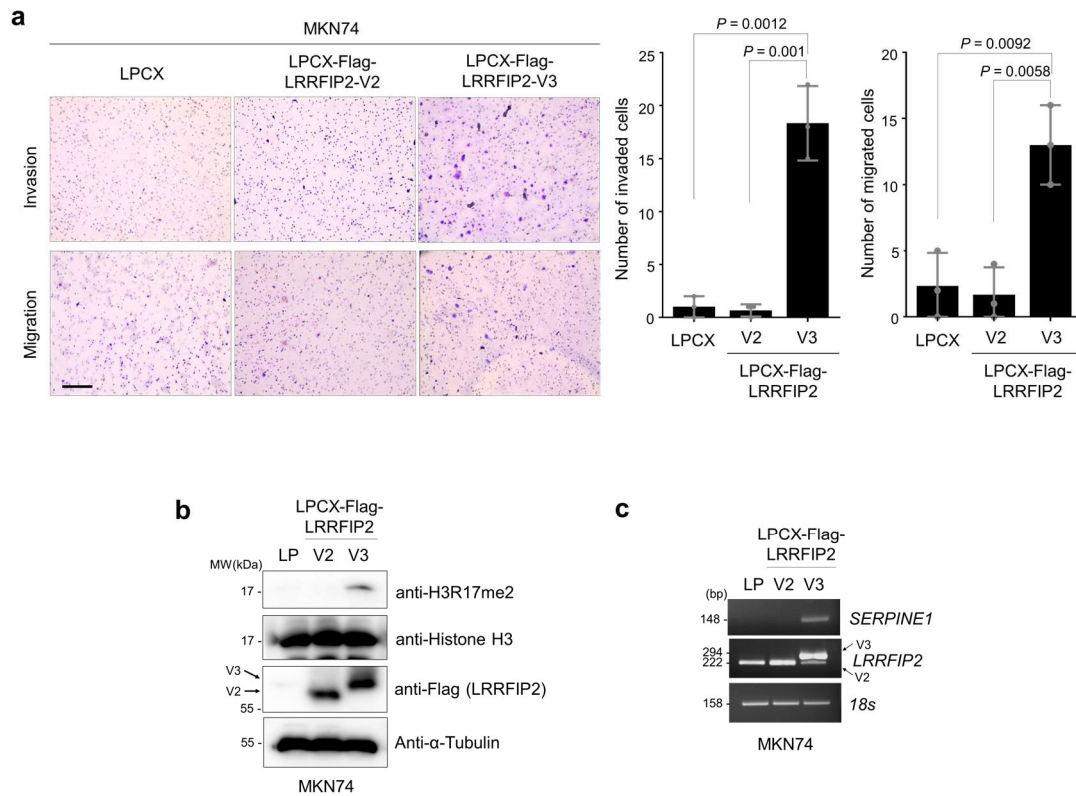

**Supplementary Fig. 8. Overexpression of LRRFIP2 variant 3 increases invasiveness and migration of MKN74 cells.** **a** Transwell migration assay and Matrigel invasion assay of LRRFIP2 variants 2 and 3-overexpressing MKN74 cells (left) and bar graphs showing number of invaded and migrated cells (right), respectively, following staining with crystal violet. Original magnification,  $\times 40$ . Scale bar, 0.5 mm. **b** RT-PCR analysis of *LRRFIP2* and *SERPINE1* in MKN74 cells overexpressing variants 2 and 3. **c** Immunoblot analysis of Flag-tagged LRRFIP2 and histone H3R17 methylation. **a** Data represent the mean  $\pm$ SD of three independent experiments. **b,c** The representative results were obtained from at least two independent experiments. All *P* values were calculated by unpaired two-tailed Student's *t* tests. These data represent the mean  $\pm$  S.D Source data are provided in the Source Data file.

Supplementary Fig. 9

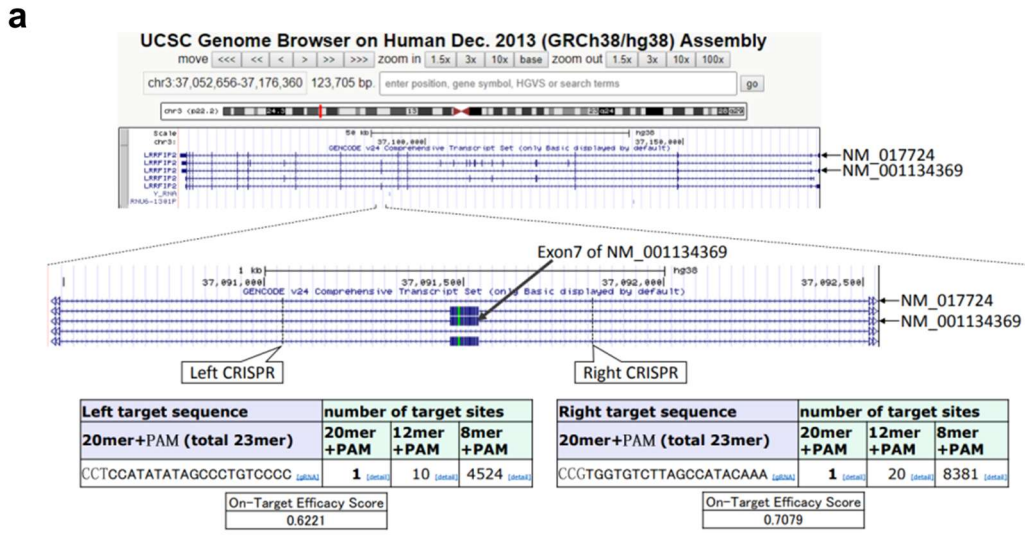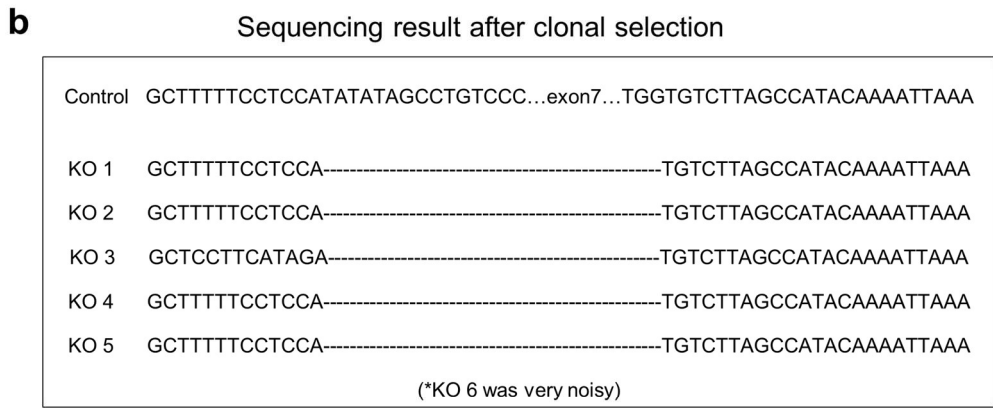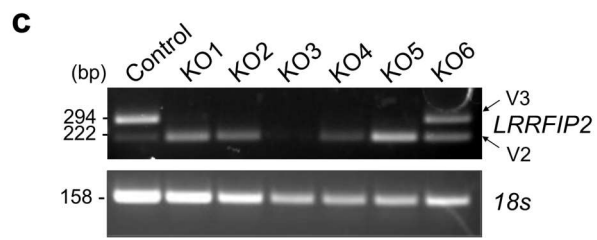

**Supplementary Fig. 9. Knockout cell lines were generated using CRISPR/Cas9 system. a** Two target sites of CRISPR/Cas9 designed to excise exon7. **b** Sequencing result of the clones after clonal selection. **c** RT-PCR analysis of LRRFIP2 in the knockout clones. 2% agarose gel was used to separate the bands of variants (294bp and 222bp).

## Supplementary Fig. 10

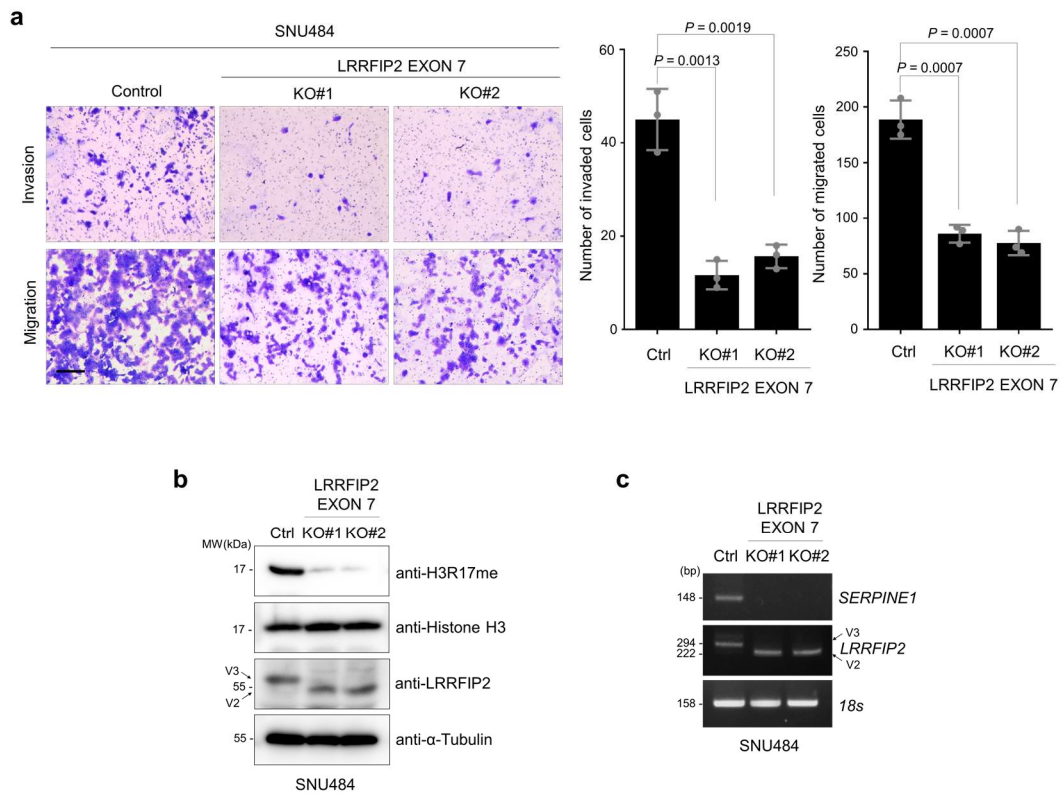

**Supplementary Fig. 10. Knockout of LRRFIP2 exon 7 reduces metastatic potential of SNU484 cells.** **a** Transwell migration assay and Matrigel invasion assay of exon 7-deleted cell lines (left) and bar graphs showing number of invaded and migrated cells (right), respectively, following staining with crystal violet. Original magnification,  $\times 40$ . Scale bar, 0.5 mm. **b** RT-PCR analysis of *LRRFIP2* and *SERPINE1* in exon 7-deleted SNU484 cells. **c** Immunoblot analysis of LRRFIP2 and histone H3R17 methylation in exon 7-deleted SNU484 cells. **a** Data are representative mean  $\pm$  SD of three independent experiments ( $N = 3$ ). **b,c** The representative results were obtained from at least two independent experiments. All P values were calculated by unpaired two-tailed Student's t tests. Source data are provided in the Source Data file.

## Supplementary Fig. 11

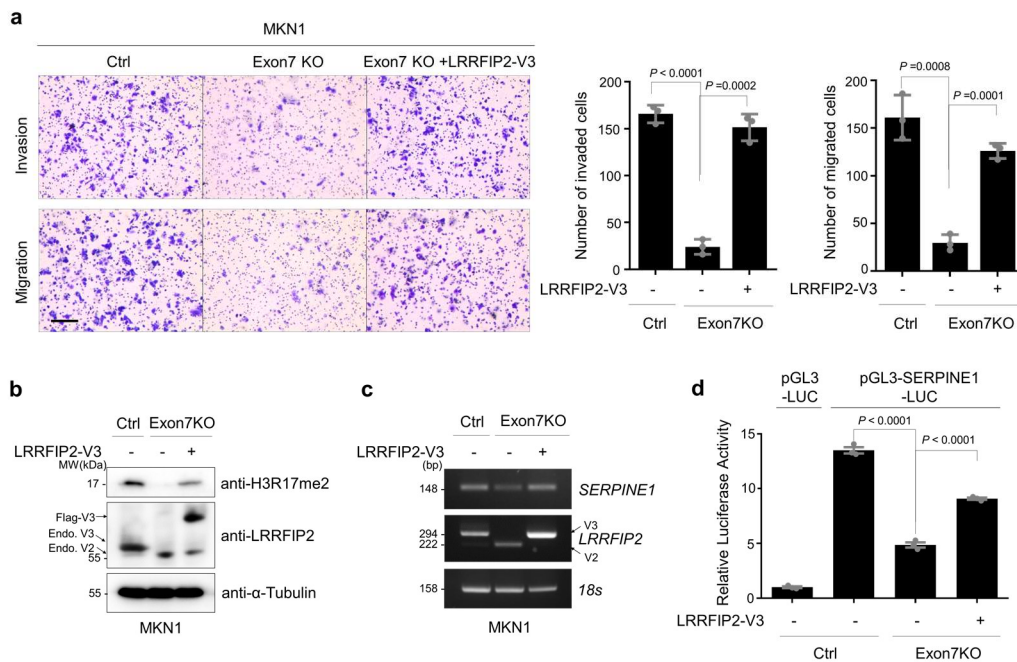

**Supplementary Fig. 11. Overexpression of LRRFIP2 variant in exon 7 KO cell line rescues invasiveness and migration of gastric cancer cells.** **a** Transwell migration assay and Matrigel invasion assay of the control, exon 7-knockout, and variant 3-rescued cell lines (left) and bar graphs showing number of invaded and migrated cells (right), respectively, following staining with crystal violet. Original magnification,  $\times 40$ . Scale bar, 0.5 mm. **b** Immunoblot analysis of histone H3R17 methylation and LRRFIP2. **c** RT-PCR analysis of *LRRFIP2* and *SERPINE1* in MKN1 control and exon 7 knockout cells. **d** Luciferase activity of *SERPINE1* promoter following overexpression of LRRFIP2 V3. **a** Data are representative mean  $\pm$  SD of three independent experiments ( $N = 3$ ). **b,c** The representative results were obtained from at least two independent experiments. **d** Data are representative mean  $\pm$  SD of three independent experiments, each conducted in triplicate ( $n = 3$ ). Unpaired two-tailed Student's *t* test ( $P < 0.05$ ) with Benjamini-Hochberg correction for multiple tests was conducted for all statistical analyses. These data represent the mean  $\pm$  S.D. Source data are provided in the Source Data file.

## Supplementary Fig. 12

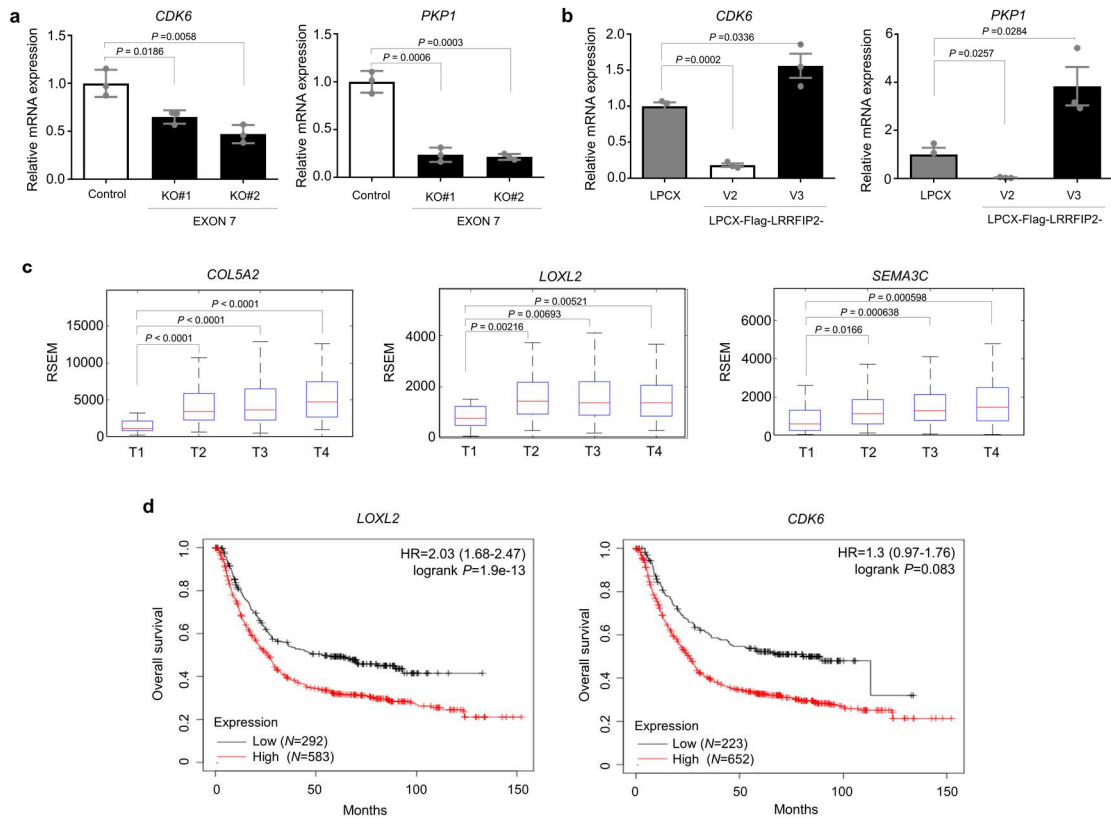

**Supplementary Fig. 12. Alternative splicing of LRRFIP2 regulates gene expression in gastric cancer cells.** **a** and **b** Real-time qRT-PCR showing the expression of altered target genes in **a** exon7-deleted MKN1 cells and **b** control, LRRFIP2 variants 2 and 3-overexpressing MKN28 cells. **c** Box plots showing *COL5A2*, *LOXL2* and *SEMA3C* expression levels in each tumor stage in gastric cancer tissues from public TCGA data sets. T1-T4 refers to the size and or/extent of the main tumor into nearby tissues. The center line is the median; the box is from the 25th to the 75th percentile. The upper or lower whisker extends from the hinge to the 1.5 x IQR (distance between the first and third quartiles) from the hinge for up and low, respectively. **d** Kaplan-Meier analysis showing overall survival depending on *LOXL2* and *CDK6* expression levels from public meta-analysis data ( $N=875$ ). **a**, **b** Data are representative mean  $\pm$  SD of three independent experiments ( $N = 3$ ).  $P$  values were calculated by unpaired two-tailed Student's  $t$  tests. **c**, **d**  $P$  values were calculated using a log-rank test. Source data are provided in the Source Data file.

### Supplementary Fig. 13

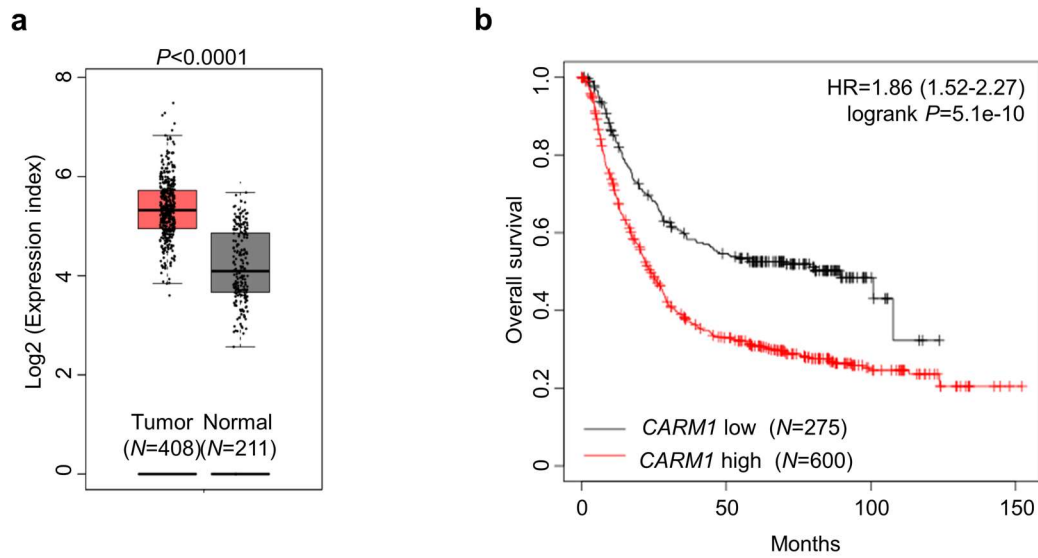

**Supplementary Fig. 13. CARM1 is highly expressed in tumor tissues and gastric cancer patients with short relapse-free survival times.** **a** Gene expression analysis of CARM1 using GEPIA based on the TCGA and GTEx database. Box plots represent the gene expression level in terms of log 2 (TPM+1) in the tumor (red,  $N = 408$ ) and normal (grey,  $N = 211$ ) samples, respectively. Normal tissues are matched TCGA adjacent tissue and GTEx data. The center line is the median; the box is from the 25th to the 75th percentile. The upper or lower whisker extends from the hinge to the 1.5 x IQR (distance between the first and third quartiles) from the hinge for up and low, respectively. **b** Kaplan-Meier analysis showing overall survival depending on CARM1 expression levels from public meta-analysis data ( $N=875$ ). All  $P$  values were calculated using a log-rank test.

## Supplementary Fig. 14

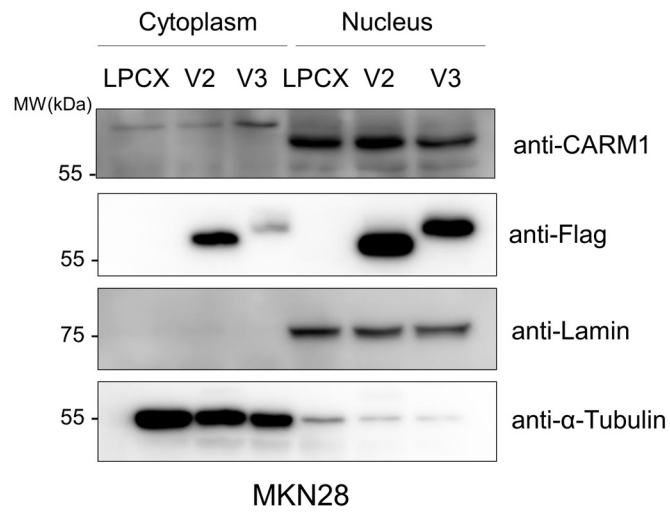

**Supplementary Fig. 14. CARM1 and LRRFIP2 variants are co-localized in the nucleus while LRRFIP2 variants are also detected in the cytoplasm.** The fractionated cell lysates were immunoblotted to show intracellular localization of CARM1 and LRRFIP2. The representative results were obtained from at least two independent experiments. Source data are provided in the Source Data file.

## Supplementary Fig. 15

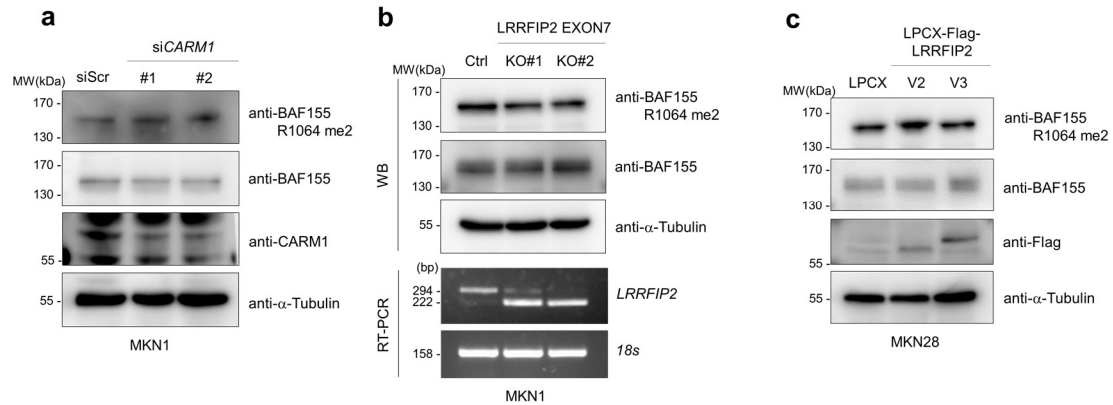

**Supplementary Fig. 15. Dimethylation of BAF155 (R1064) is not associated with the expression levels or CARM1 or splicing variants of LRRFIP2 in gastric cancer cells. a** Immunoblot analysis of methylation of BAF155 (R1064) and total BAF155 expressions in control and CARM1 siRNA-transfected MKN1 cells. **b** Immunoblot and analysis of methylation of BAF155 (R1064) and total BAF155 expressions and RT-PCR analysis of *LRRFIP2* variants in control and CARM1 siRNA-transfected MKN1 cells. **c** Immunoblot analysis of methylation of BAF155 (R1064) and total BAF155 expressions in control and LRRFIP2 variants 2 and 3-overexpressing MKN28 cells. The representative results were obtained from at least two independent experiments. Source data are provided in the Source Data file.



## Supplementary Fig. 16

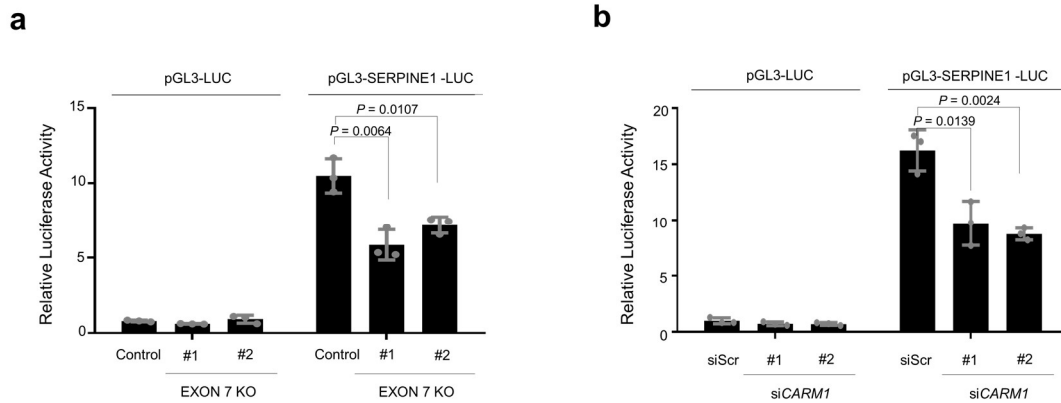

**Supplementary Fig. 16. Exon 7 deletion reduces the luciferase activity of the *SERPINE1* promoter.** **a** Control and exon 7-deleted MKN1 cells were transfected with *SERPINE1* promoter (-1500/+500) and then assayed for luciferase activity. **b** Control and CARM1-knockdown MKN1 cells were transfected with *SERPINE1* promoter (-1500/+500) and then assayed for luciferase activity. Data are representative mean  $\pm$  SD of three independent experiments, each conducted in triplicate ( $n = 3$ ). Unpaired two-tailed Student's  $t$  test ( $P < 0.05$ ) with Benjamini-Hochberg correction for multiple tests was conducted for all statistical analyses. Source data are provided in the Source Data file.

## Supplementary Fig. 17

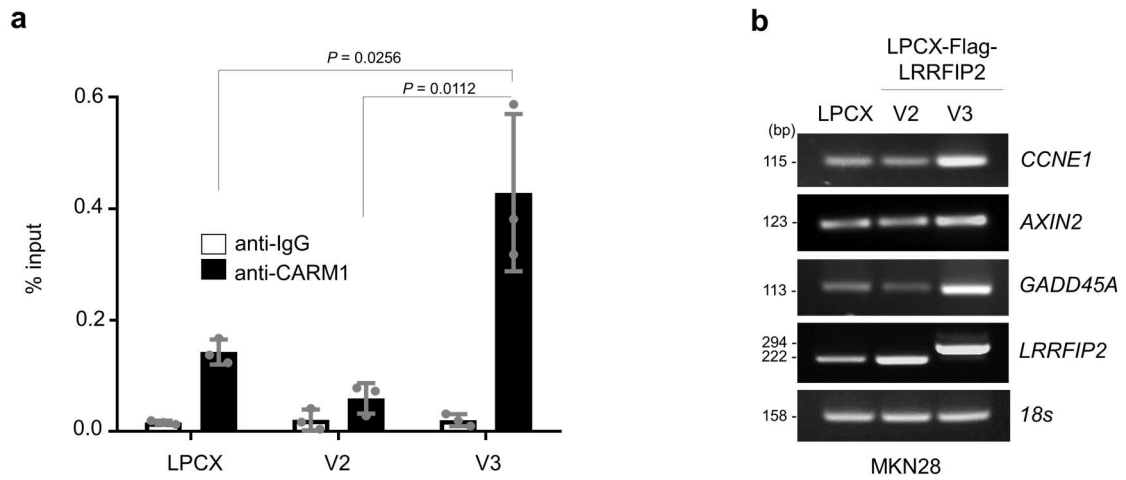

**Supplementary Fig. 17. Overexpression of LRRFIP2 variant 3 induces transcription of the target genes of CARM1.** **a** qChIP analysis showing the recruitment of CARM1 to the human *Cyclin E1* promoter (-1546bp/-1331bp) in control and LRRFIP2 variants 2 and 3-overexpressing MKN28 cells. Precipitation was conducted with anti-normal IgG or anti-CARM1 antibodies. **b** RT-PCR analysis of CARM1 target genes (*CCNE1*, *AXIN2*, and *GADD45A*) and *LRRFIP2* in control and LRRFIP2 variants 2 and 3-overexpressing MKN28 cells. **a** Data represent the mean  $\pm$ SD of three independent samples. **b** The representative results were obtained from at least two independent experiments. All P values were calculated by unpaired two-tailed Student's t tests. Source data are provided in the Source Data file.

### Supplementary Fig. 18

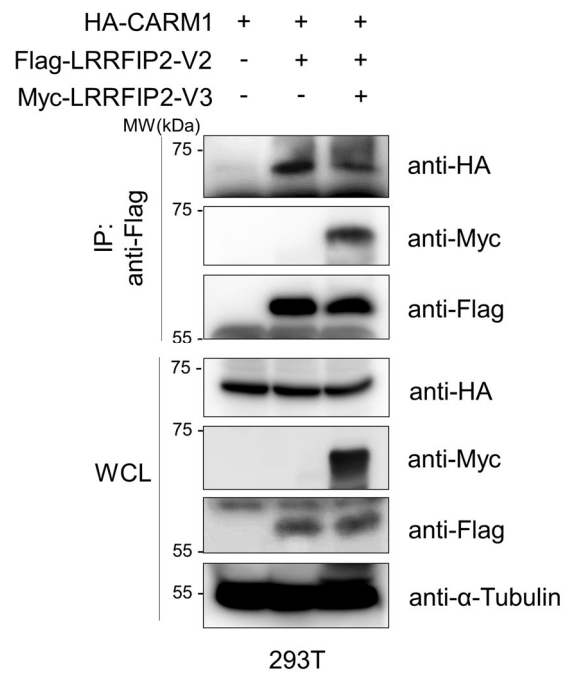

**Supplementary Fig. 18. Overexpression of LRRFIP2 variant 3 reduces interaction between CARM1 and LRRFIP2 variant 2.** Immunoprecipitation assay showing the interaction between CARM1 and LRRFIP2 variant 2 in the presence of LRRFIP2 variant 3. The representative results were obtained from at least two independent experiments. Source data are provided in the Source Data file.

## Supplementary Fig. 19

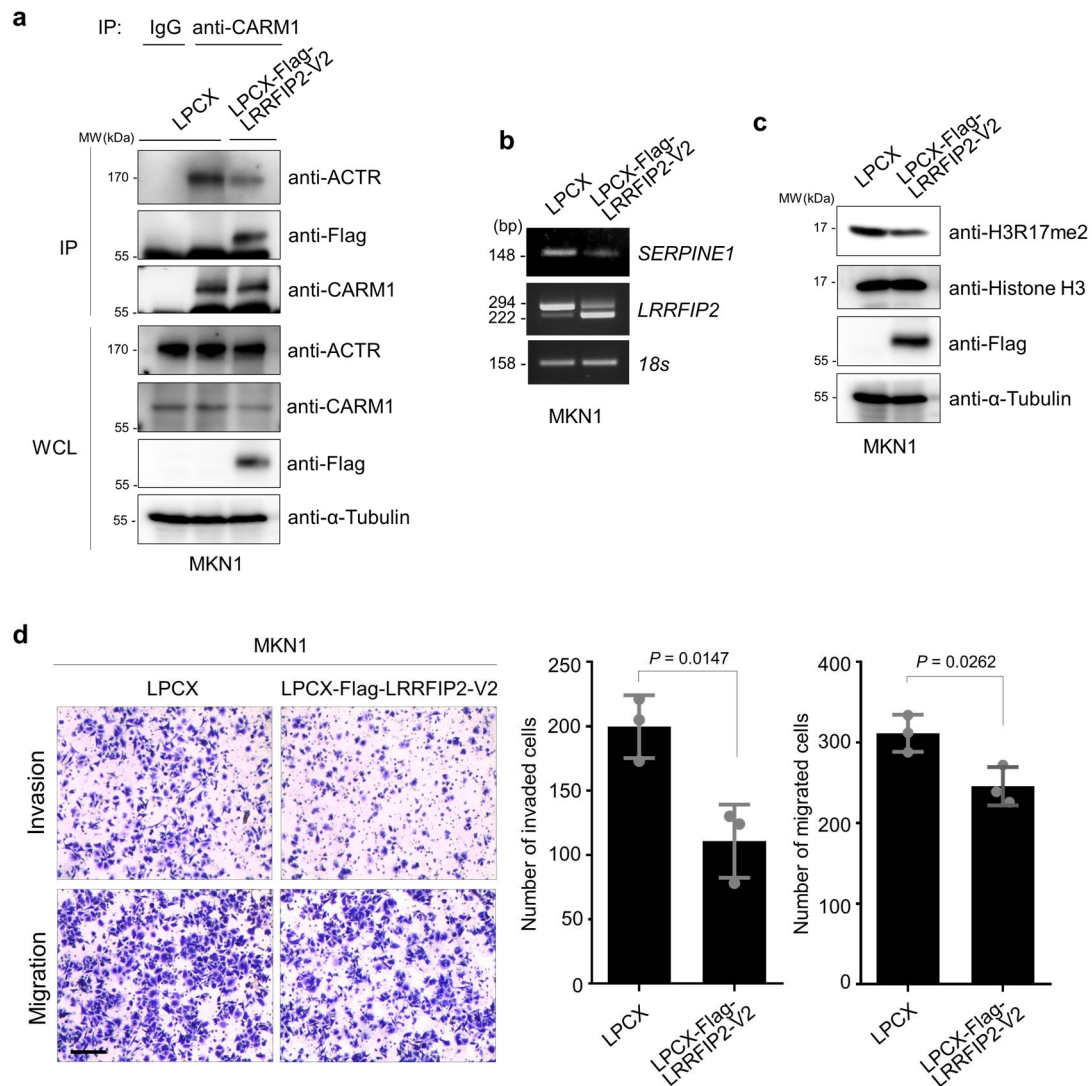

**Supplementary Fig. 19. Overexpression of LRRFIP2 variant 2 in MKN1 cells reduces the metastatic potential of gastric cancer cells.** **a** Immunoprecipitation assay showing the interaction between endogenous CARM1 and ACTR. **b** RT-PCR analysis showing mRNA level of *SERPINE1*. **c** Immunoblot analysis of Histone H3R17me2. **d** Transwell migration assay and Matrigel invasion assay of MKN28 cell lines upon overexpression of LRRFIP2 variant 2 (left) and bar graphs showing number of invaded and migrated cells (right), respectively, following staining with crystal violet. **a-c** The representative results were obtained from at least two independent experiments. **d** Data represent the mean  $\pm$ SD of three independent experiments. Original magnification,  $\times 40$ . Scale bar, 0.5 mm. All *P* values were calculated by unpaired two-tailed Student's *t* tests. Source data are provided in the Source Data file.

## Supplementary Fig. 20

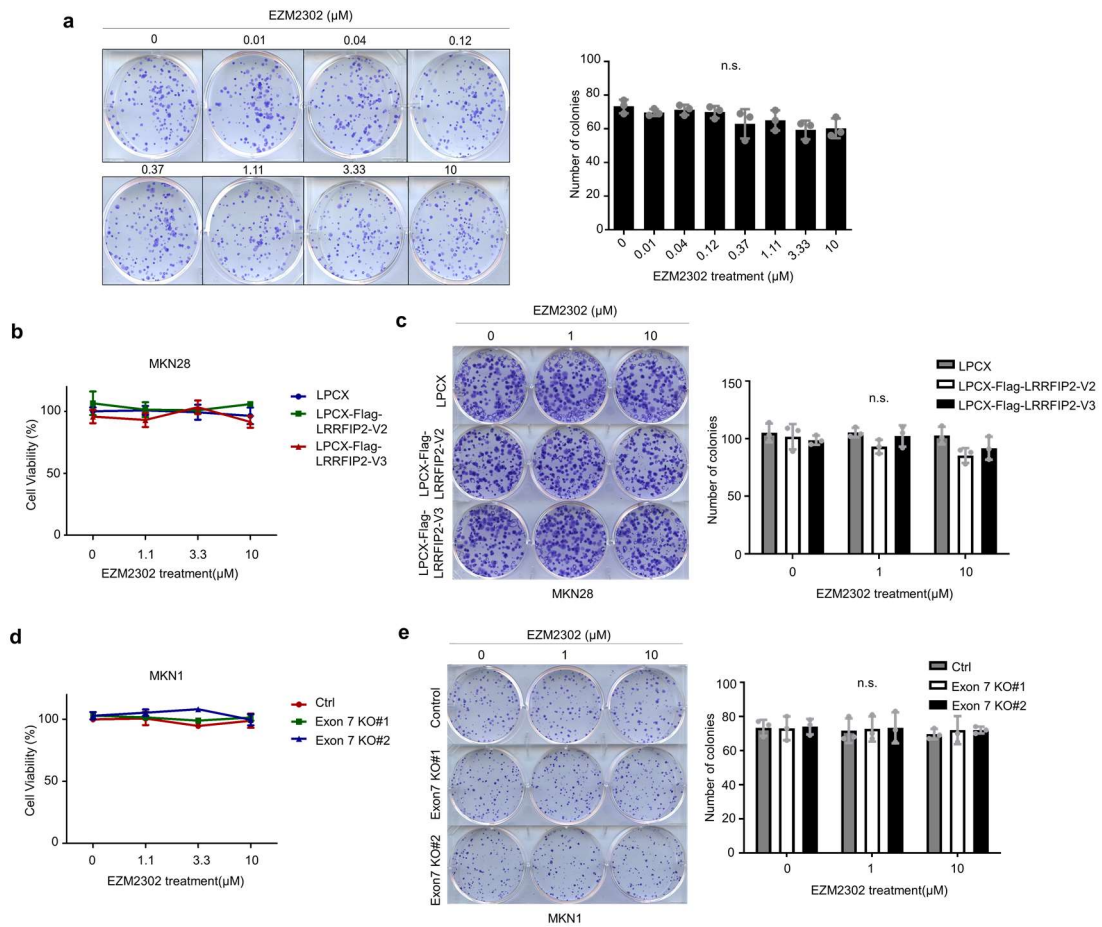

**Supplementary Fig. 20. EZM2302 treatment does not affect cell proliferation of MKN1 and MKN28 cells *in vitro*.** **a** Colony formation assays performed in cells with EZM2302 treatment. **b** Cell doublings of MKN28 cells overexpressing LRRFIP2 variants 2 and 3 with EZM treatment. **c** Colony formation assays performed in MKN28 cells overexpressing LRRFIP2 variants 2 and 3 with EZM2302 treatment. **d** Cell doublings of control and exon 7 deleted MKN1 cells with EZM2302 treatment. **e** Colony formation assay performed in control and exon 7 deleted MKN1 cells with EZM treatment. Data represent the mean  $\pm$ SD of three independent experiments. All P values were calculated by unpaired two-tailed Student's t tests. n.s.: not significant. Source data are provided in the Source Data file.

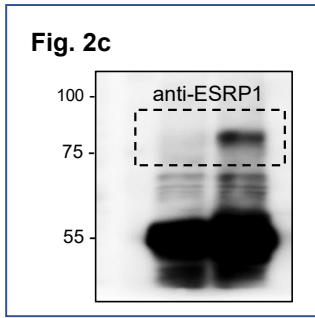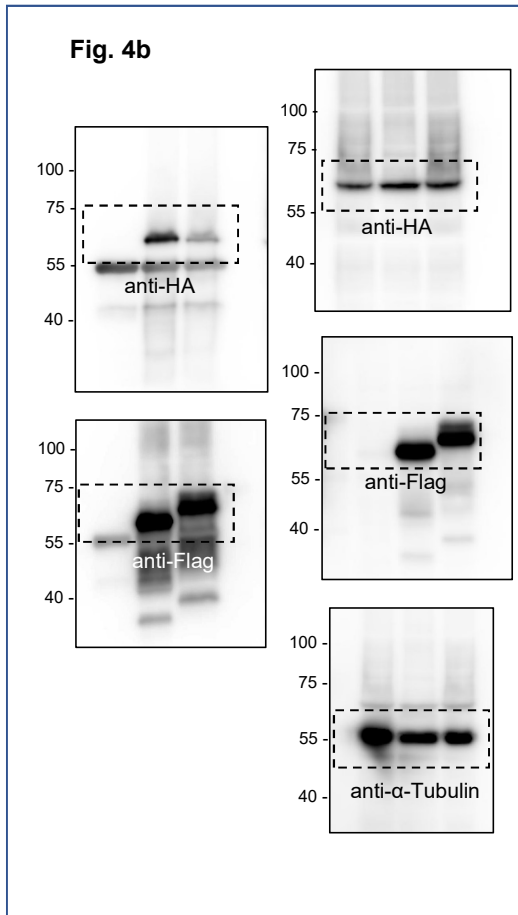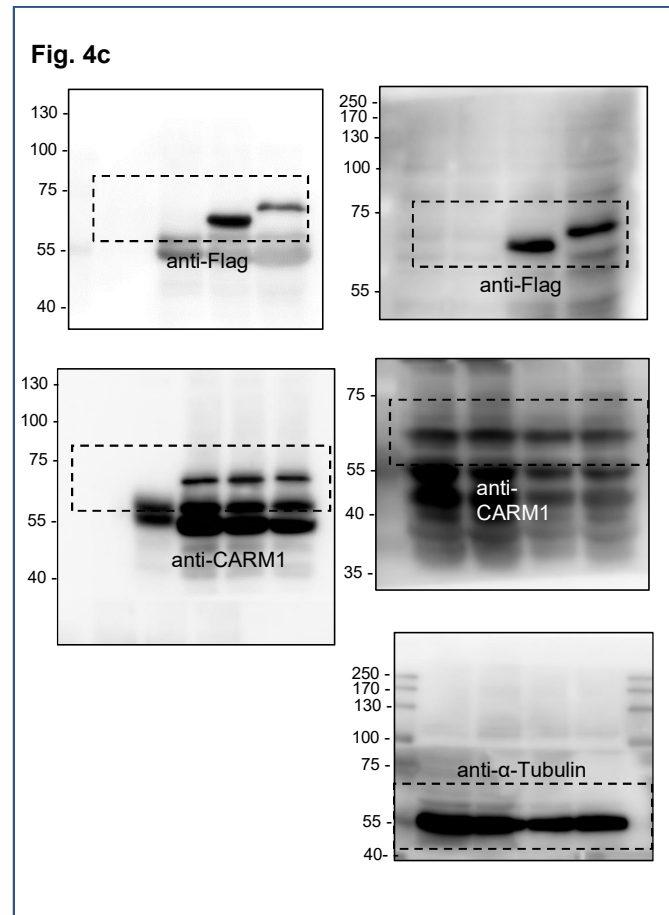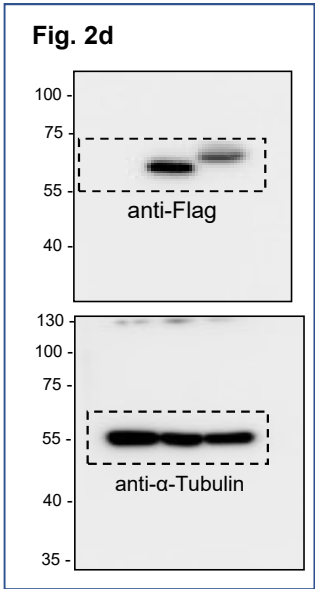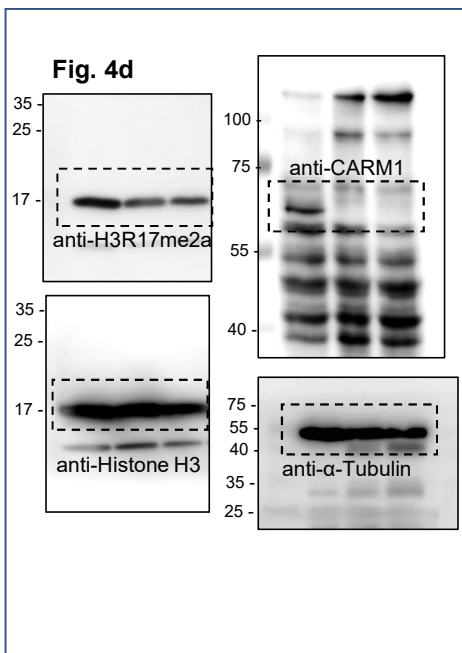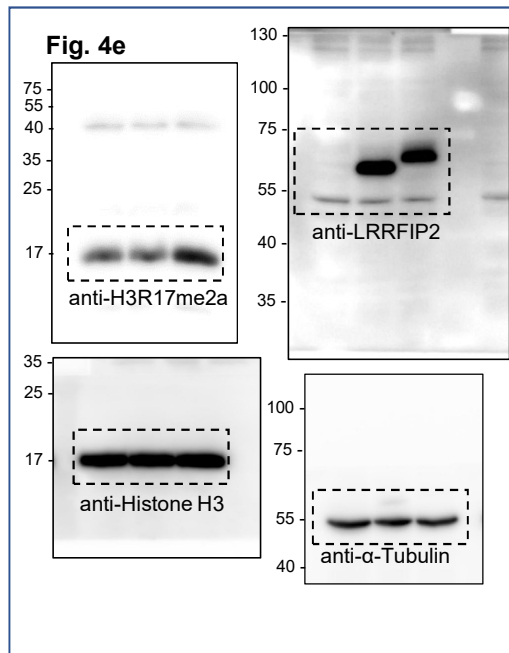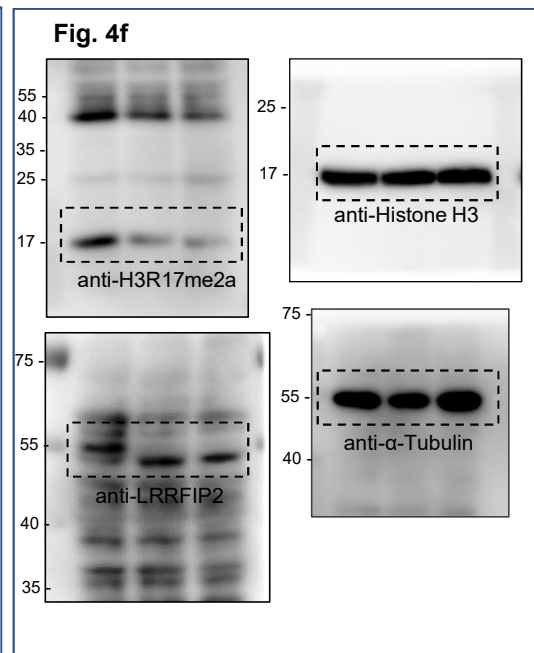

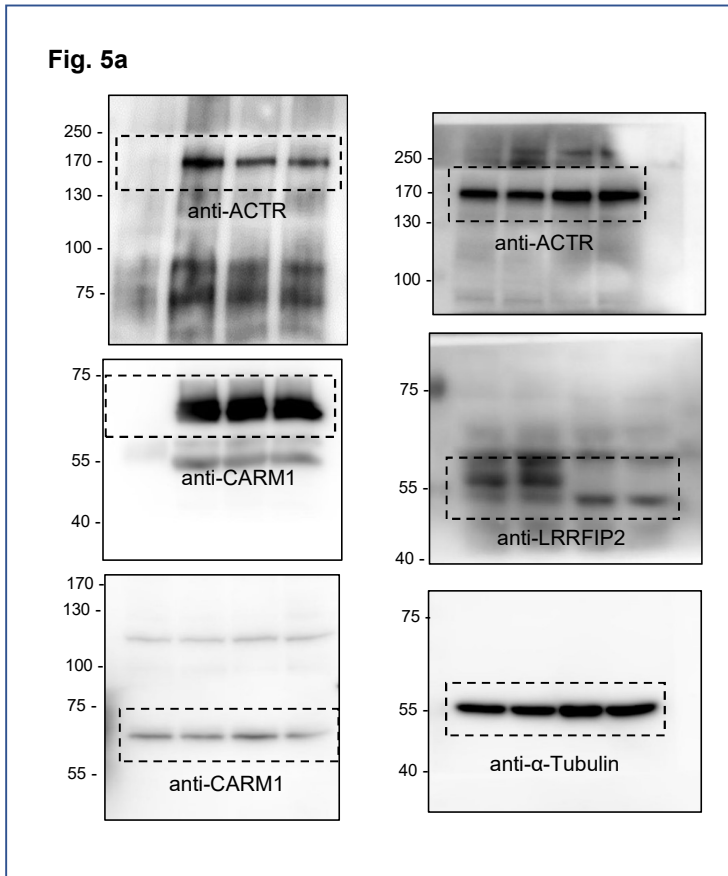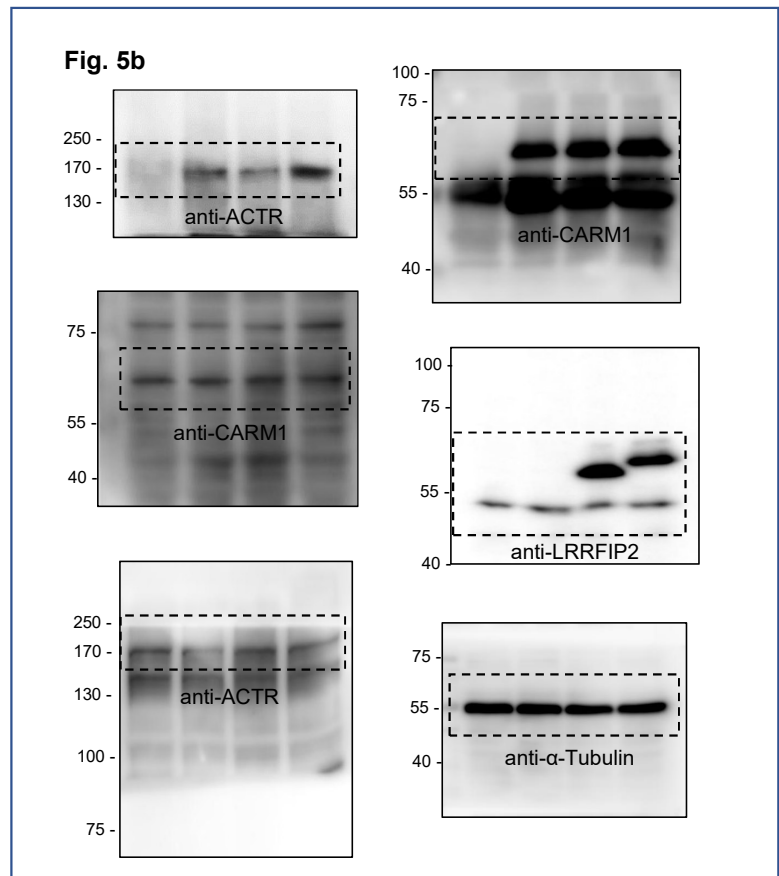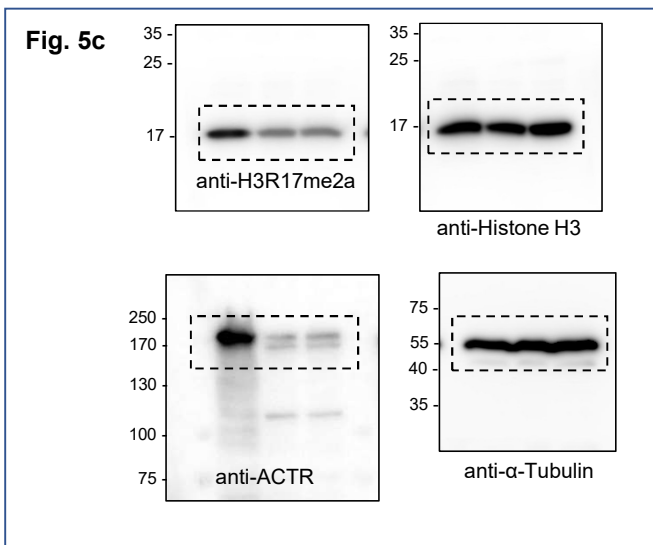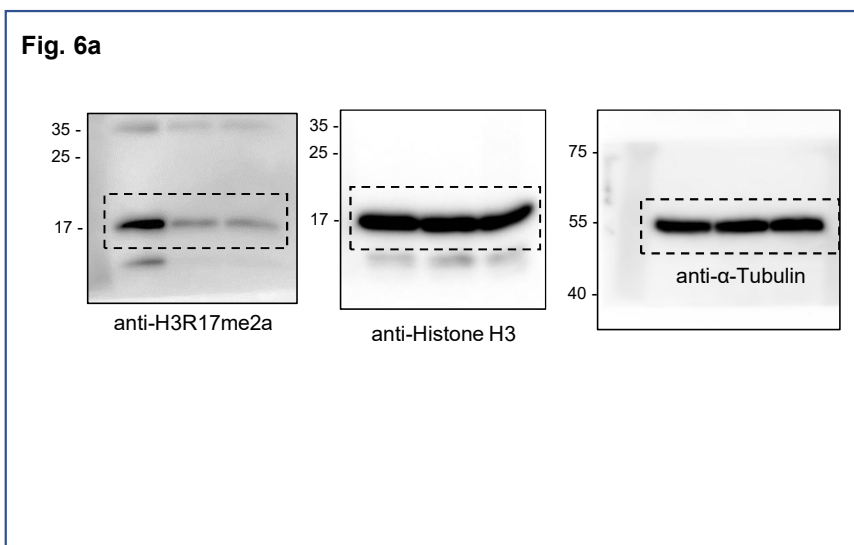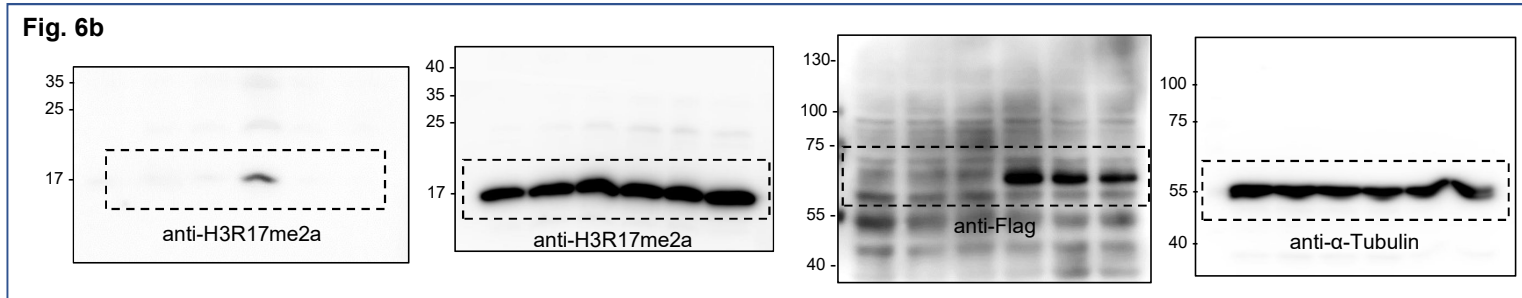

**Fig. S2**

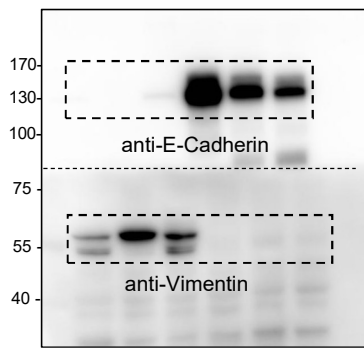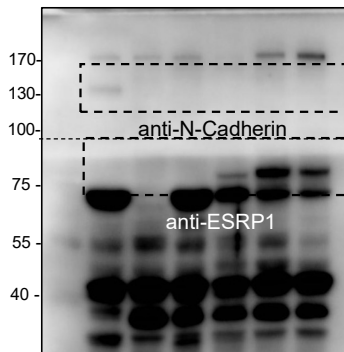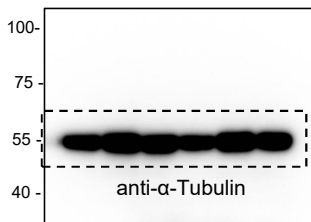

**Fig. S8**

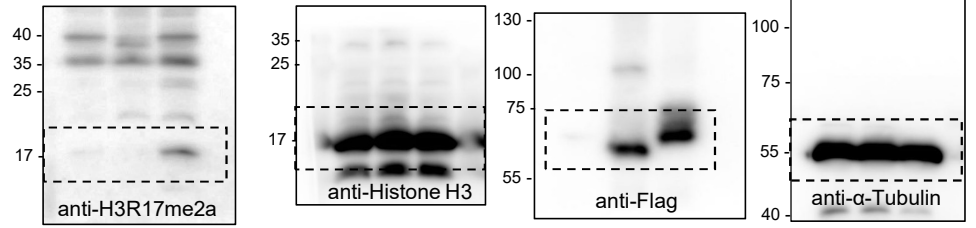

**Fig. S10**

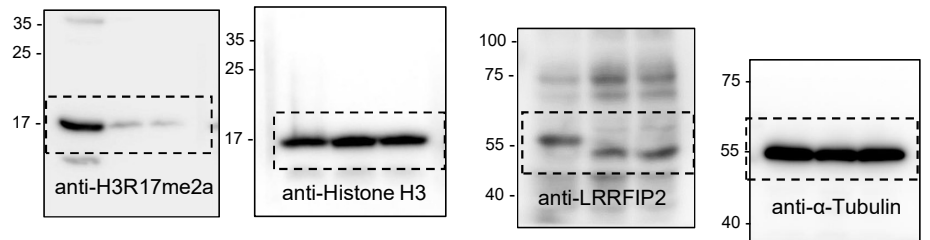

**Fig. S11**

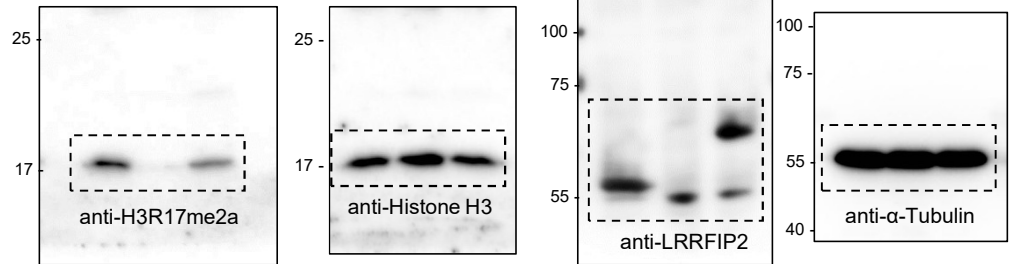

**Fig. S14**

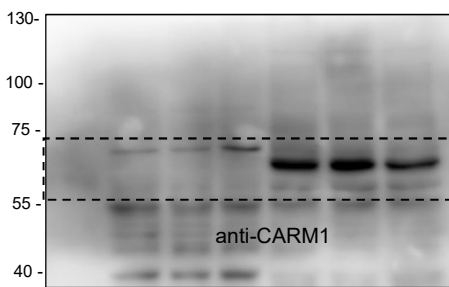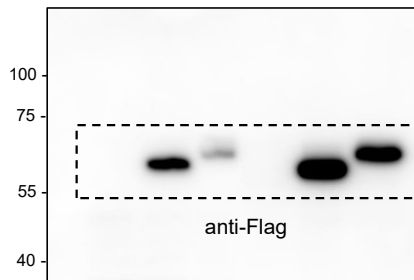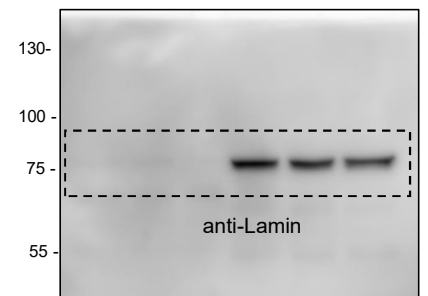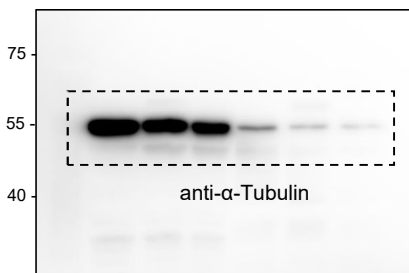



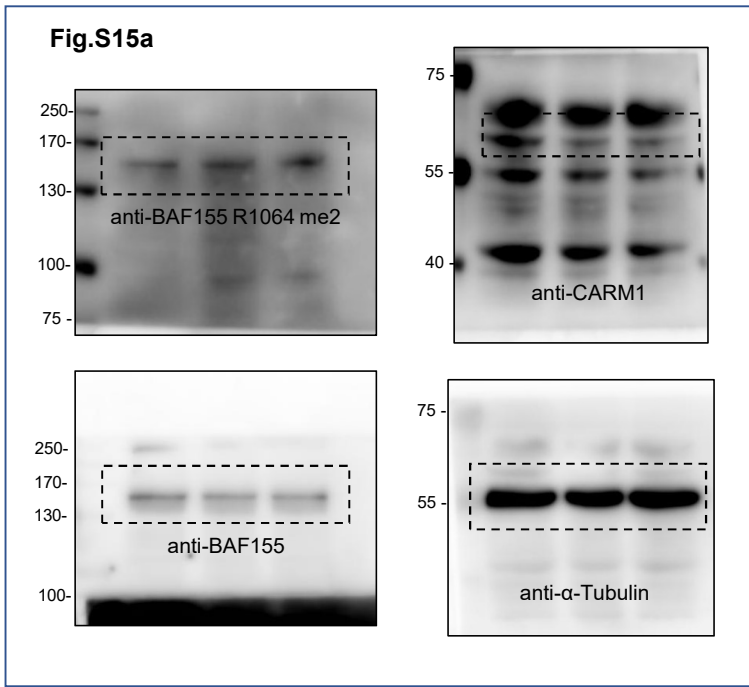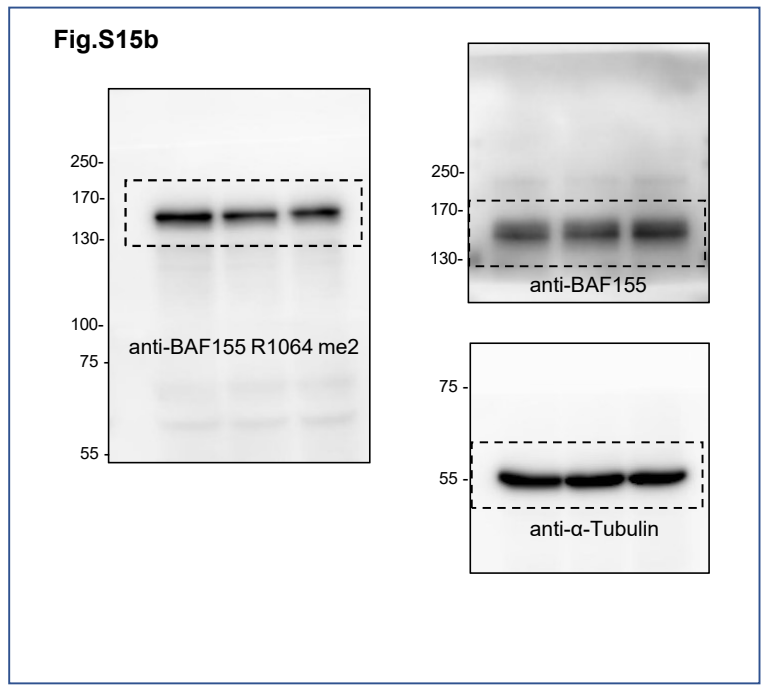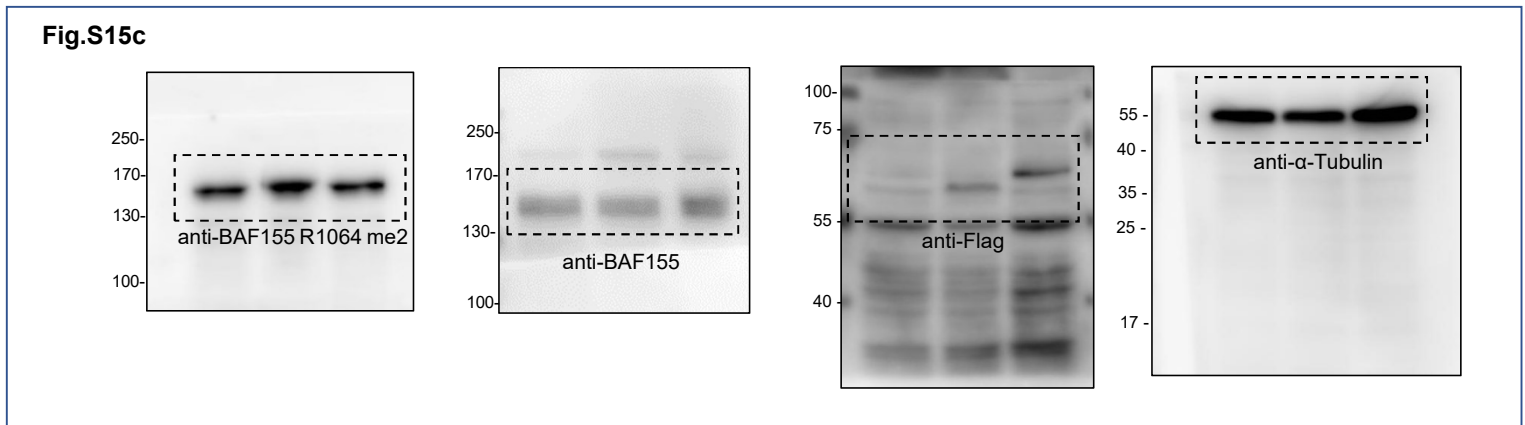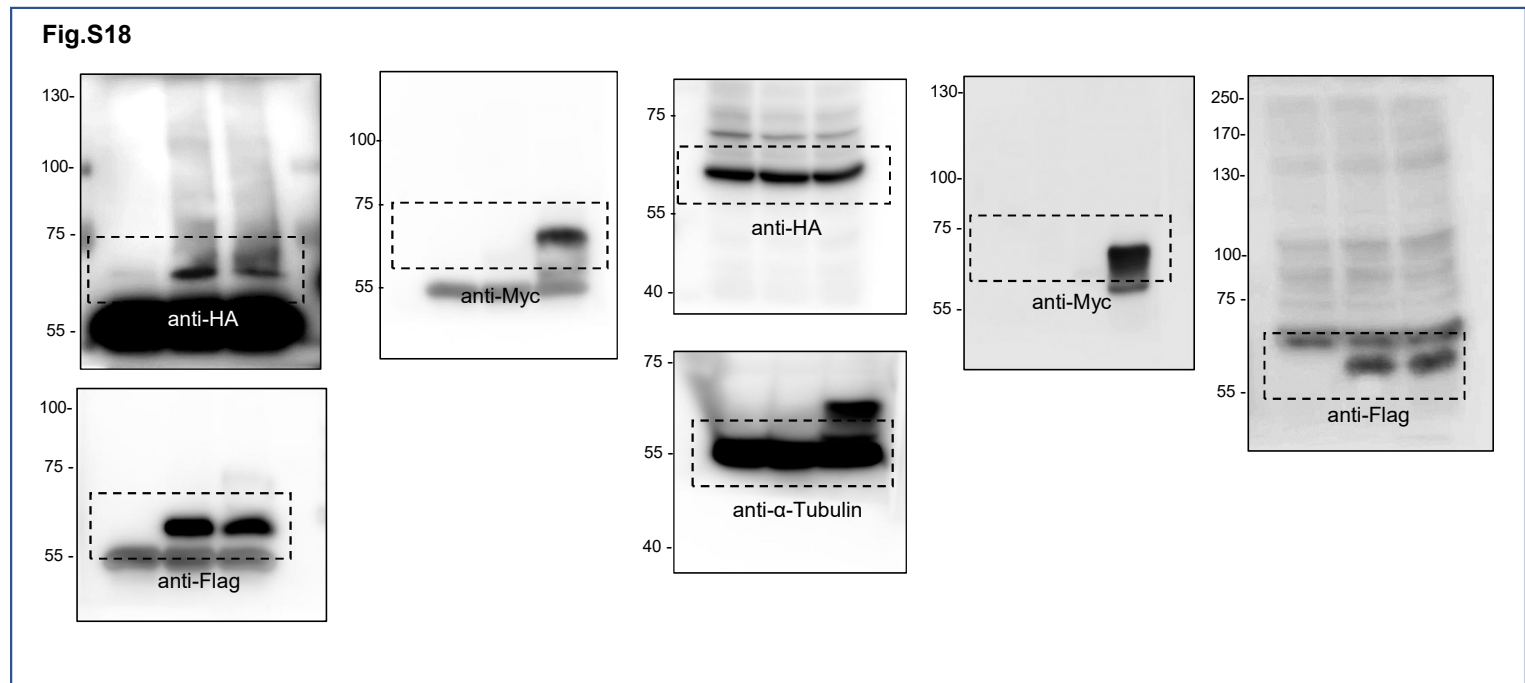

Fig.S19a

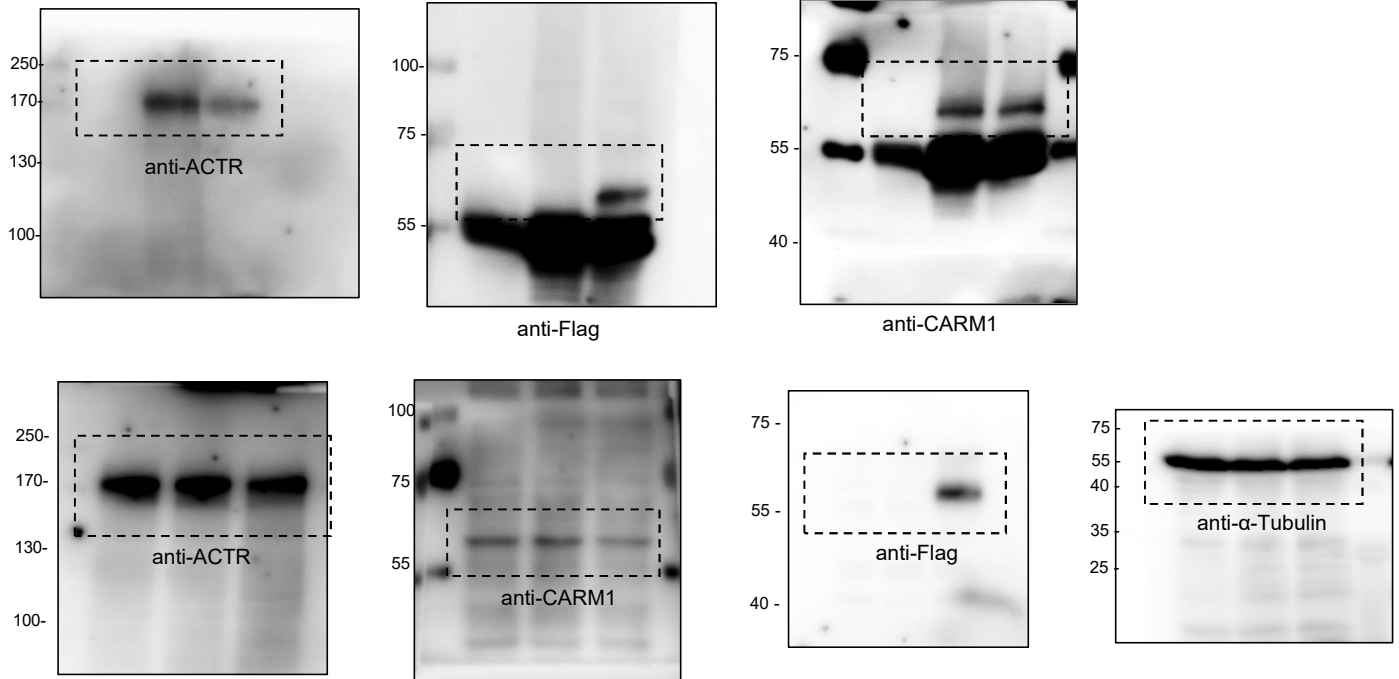

Fig.S19c

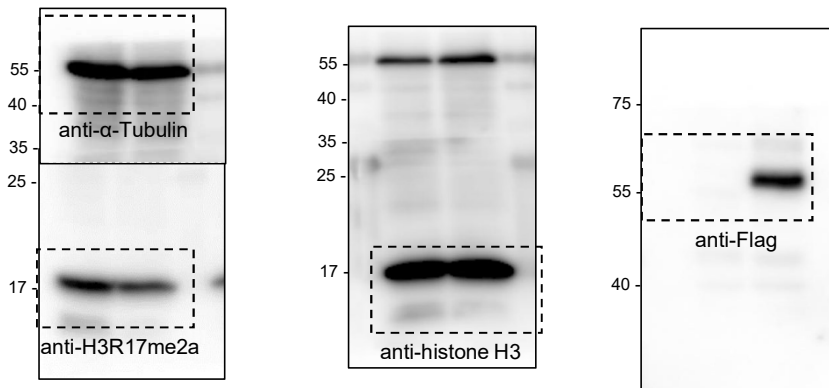

Fig. 1j

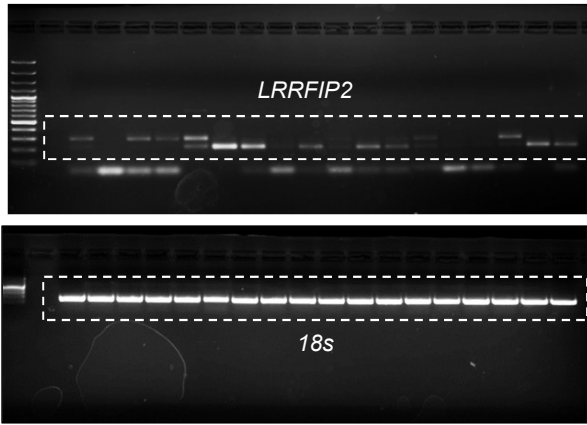

Fig. 2b

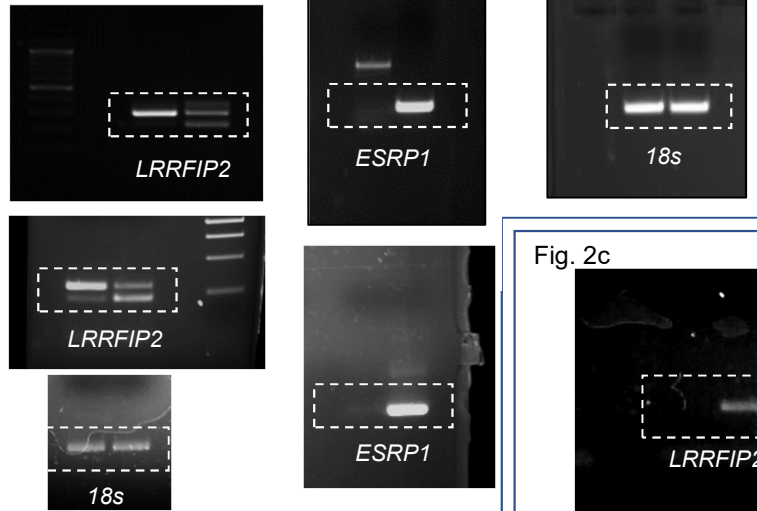

Fig. 2c

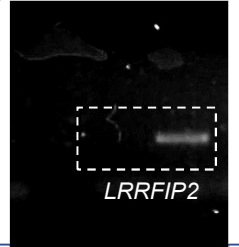

Fig. 2d

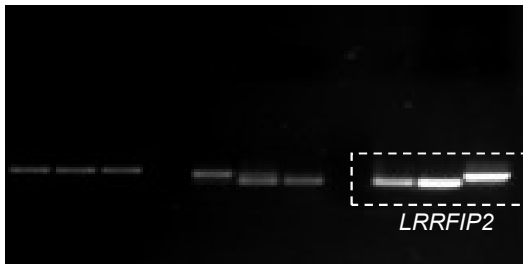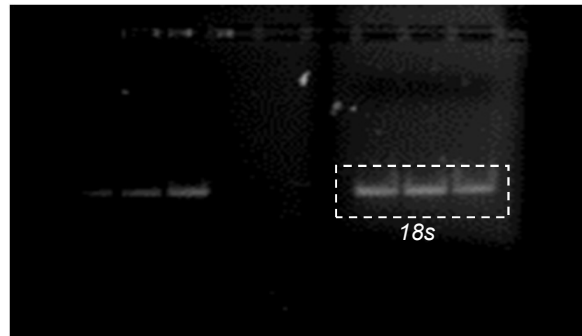

Fig. 2i

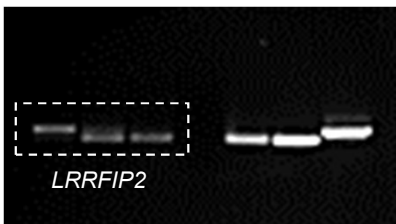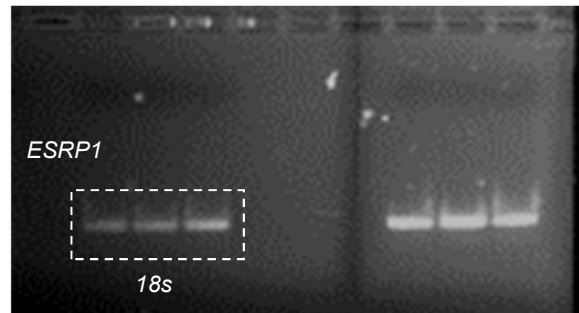

Fig. 4f

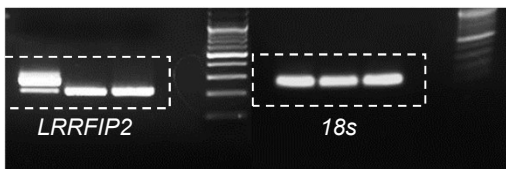

Fig. 4g

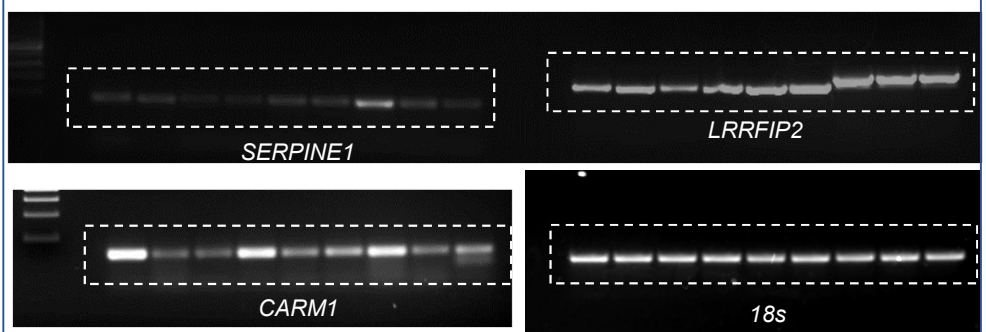

Fig. 6f

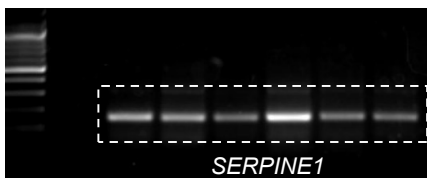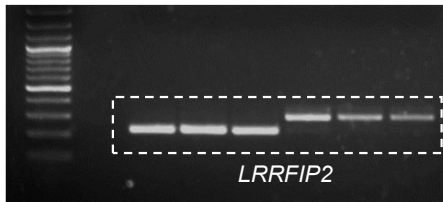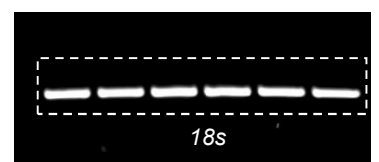

Fig. S3

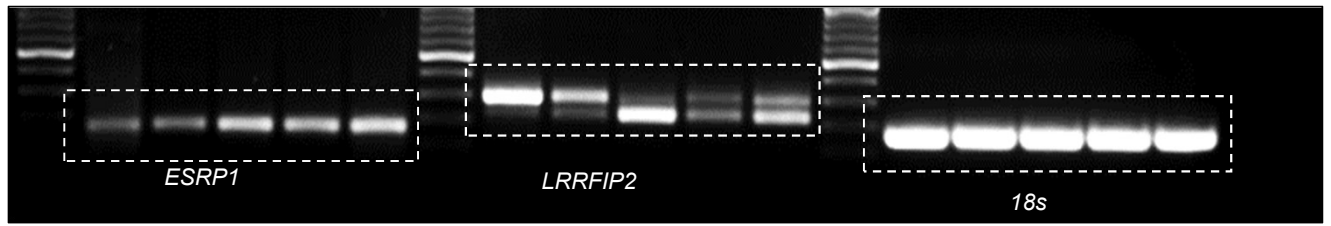

Fig. S8b

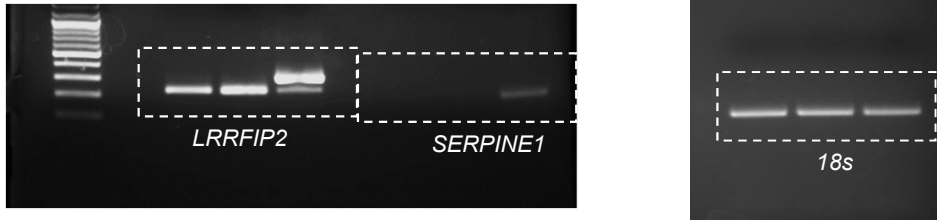

Fig. S9b

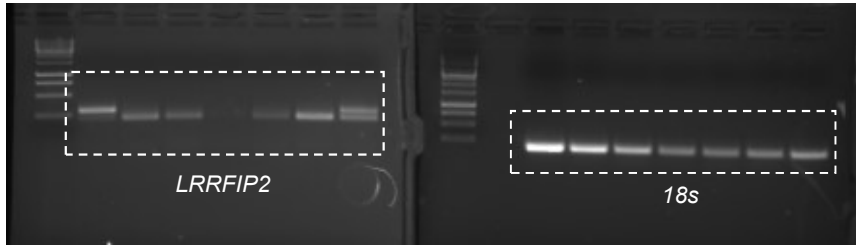

Fig. S11c

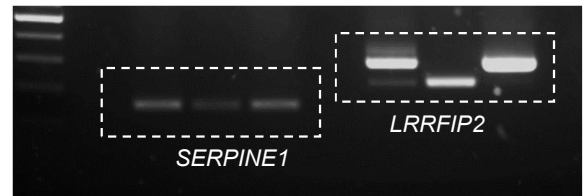

Fig. S10b

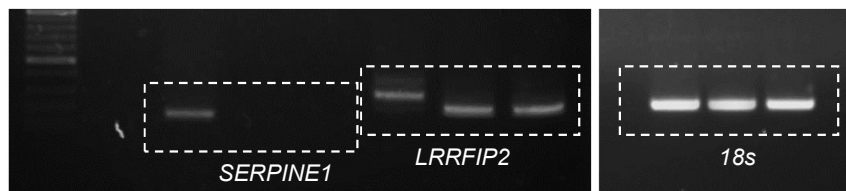

Fig. S17b

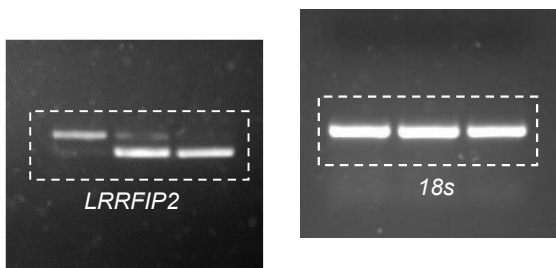

Fig. 17b

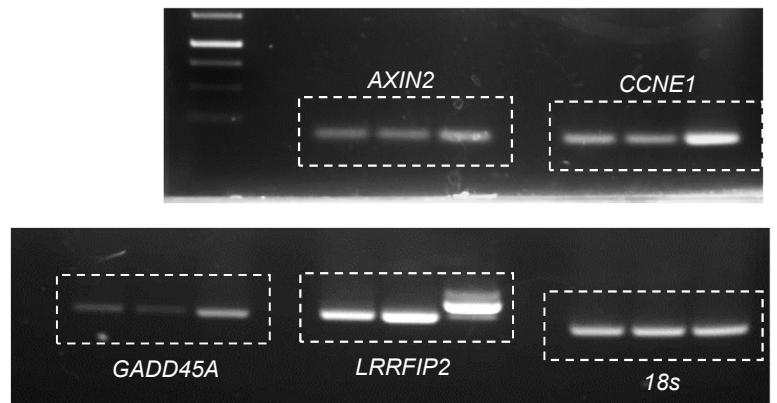

Fig. 19b

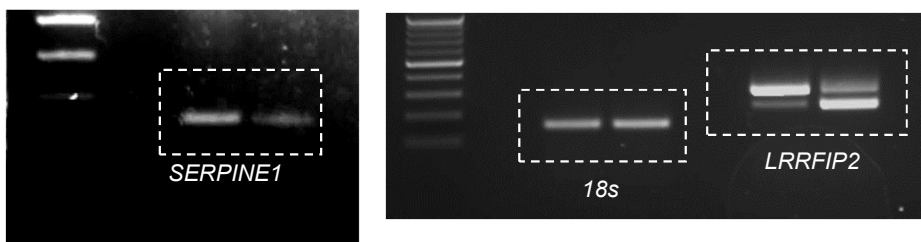

**Supplementary Table 1.** A list of primer sequences used.

|          | Construct                        | Species  | Direction            | Sequence (5' - 3')                |                      |
|----------|----------------------------------|----------|----------------------|-----------------------------------|----------------------|
| Cloning  | pCS4-3Flag-LRRFIP2               | Human    | Forward              | GATC CTCGAG GGGA CTCCTGCTTC TGGA  |                      |
|          |                                  |          | Reverse              | GATC GCTAGC CTA CTGCTGGGCCAGAAGT  |                      |
|          | pCS4-3Flag-ESRP1                 | Human    | Forward              | ATGC AGGCCT ACGG CCTCTCCGGATTAC   |                      |
|          |                                  |          | Reverse              | ATGC TCTAGA TAAATACAAACCCATTCT    |                      |
|          | pCS4-3HA-CARM1                   | Human    | Forward              | ATGAATTCAATGGCAGCGGCGGCGGCGGCGGTG |                      |
|          |                                  |          | Reverse              | GATCTAGACTAGCTCCCGTAGTGCATGGTGTGG |                      |
| RT-PCR   | LRRFIP2                          | Human    | Forward              | CCTCAGCAACAACCCCTCTA              |                      |
|          |                                  |          | Reverse              | CCTGCTCTTCAATAACATCC              |                      |
|          | ESRP1                            | Human    | Forward              | ACGGAGGACTGCAAAGAAGA              |                      |
|          |                                  |          | Reverse              | CTGACATGAAGCTGCCCATC              |                      |
|          | SERPINE1                         | Human    | Forward              | TCTGCCCTCACCAACATTCT              |                      |
|          |                                  |          | Reverse              | CGGTCATTCCCAGGTTCTCT              |                      |
|          | CARM1                            | Human    | Forward              | GGCTCCAAGTCCAGTAACCT              |                      |
|          |                                  |          | Reverse              | TCCACATGTTTTCCGAGGGA              |                      |
|          | CCNE1                            | Human    | Forward              | AAGTGGCGTTTAAGTCCCCT              |                      |
|          |                                  |          | Reverse              | GATTTGCTGGGGATACTGCG              |                      |
|          | GADD45A                          | Human    | Forward              | CTGGAGAGCAGAAGACCGAA              |                      |
|          |                                  |          | Reverse              | CTGGATCAGGGTGAAGTGGA              |                      |
|          | AXIN2                            | Human    | Forward              | TGACCCTGGGCCACTTTAAA              |                      |
|          |                                  |          | Reverse              | CCGTCTCATCCTCCCAGATC              |                      |
|          | 18S                              | Human    | Forward              | CCCAACTTCTTAGAGGGACA              |                      |
|          |                                  |          | Reverse              | TAGTCAAGTTCGACCGTCTT              |                      |
|          | qRT-PCR                          | SERPINE1 | Human                | Forward                           | TCTGCCCTCACCAACATTCT |
|          |                                  |          |                      | Reverse                           | CGGTCATTCCCAGGTTCTCT |
| CARM1    |                                  | Human    | Forward              | GGCTCCAAGTCCAGTAACCT              |                      |
|          |                                  |          | Reverse              | TCCACATGTTTTCCGAGGGA              |                      |
| COL5A2   |                                  | Human    | Forward              | TGAGAAGGGAATGGCTGGAG              |                      |
|          |                                  |          | Reverse              | AATTCCTCTTTCTCCCGGCA              |                      |
| LOXL2    |                                  | Human    | Forward              | TGCAGCGACAAAAGGATTCC              |                      |
|          |                                  |          | Reverse              | CTTGCGGTAGGTTGAGAGGA              |                      |
| SEMA3C   |                                  | Human    | Forward              | TTCAACCCCAACGTGAACAC              |                      |
|          |                                  |          | Reverse              | TCAGTTCTGACCGCATTCTT              |                      |
| CD74     |                                  | Human    | Forward              | GCTGTCGGGAAGATCAGAAG              |                      |
|          |                                  |          | Reverse              | CAGGATGAAAAGCCTGTGT               |                      |
| PKP1     |                                  | Human    | Forward              | AGTCCAAGTCTTCCCAGTCG              |                      |
|          |                                  |          | Reverse              | TATCCCATGAGCCATTCCC               |                      |
| CDK6     |                                  | Human    | Forward              | TGCACAGTGCACGAACAGA               |                      |
|          |                                  |          | Reverse              | ACCTCGGAGAAGCTGAAACA              |                      |
| ACTR     |                                  | Human    | Forward              | TCGAGTGTCTAGTCCTCCA               |                      |
|          |                                  |          | Reverse              | AAACTGCTGCTGGGAAAAGG              |                      |
| 18S      | Human                            | Forward  | AATGCTTCTCTGGCACGTCT |                                   |                      |
|          |                                  | Reverse  | TCTTCCATCTCACGCATCTG |                                   |                      |
| ChIP-PCR | qChIP SERPINE1<br>(+336/+474)    | Human    | Forward              | ACCCCATCACCCAGTAACAA              |                      |
|          |                                  |          | Reverse              | ACAGTGCCAGCCTTAATTC               |                      |
|          | qChIP CCNE1<br>(-1626bp/-1441bp) | Human    | Forward              | AGACCCTGGCTCTAACTTCA              |                      |
|          |                                  |          | Reverse              | ACCGGCTAATGAGAGAGACA              |                      |

**Supplementary Table 2.** A list of Primary Antibodies used

| Antibody                                              | Catalog number     | Dilution                              | Species Reactivity | Supplier       |
|-------------------------------------------------------|--------------------|---------------------------------------|--------------------|----------------|
| LRRFIP2                                               | ab172367           | Immunoblotting (1:1000)               | Mouse              | Abcam          |
| PRMT4/CARM1 (3H2)                                     | #12495S lot: 2     | Immunoblotting (1:1000)               | Mouse              | Cell Signaling |
|                                                       |                    | Immunoprecipitation (1:200)           |                    |                |
| SRC1 (128E7)                                          | #2191S lot: 2      | Immunoblotting (1:1000)               | Rabbit             | Cell Signaling |
| SRC-2 (D2X4M)                                         | #96687S lot: 1     | Immunoblotting (1:1000)               | Rabbit             | Cell Signaling |
| SRC-3 (5E11)                                          | #2126S lot:4       | Immunoblotting (1:1000)               | Rabbit             | Cell Signaling |
| ESRP1                                                 | 21045-1AP          | Immunoblotting (1:1000)               | Rabbit             | Proteintech    |
|                                                       |                    | RNA-Immunoprecipitation (1:200)       |                    |                |
| Asymmetric Dimethyl- SMARCC1/BAF155 (Arg1064) (D8I3U) | #94962S lot: 1     | Immunoblotting (1:1000)               | Rabbit             | Cell Signaling |
| SMARCC1/BAF155 (D7F8S)                                | #11956S lot: 4     | Immunoblotting (1:1000)               | Rabbit             | Cell Signaling |
| Histone H3 (asymmetric di methyl R17)                 | ab8284             | Immunoblotting (1:1000)               | Rabbit             | Abcam          |
|                                                       |                    | Chromatin Immunoprecipitation (1:100) |                    |                |
| Histone H3                                            | ab1791             | Immunoblotting (1:1000)               | Rabbit             | Abcam          |
| Vimentin (V9)                                         | ab8069             | Immunoblotting (1:1000)               | Rabbit             | Abcam          |
| N-Cadherin                                            | 610920             | Immunoblotting (1:1000)               | Mouse              | BD Biosciences |
| E-Cadherin                                            | 610181             | Immunoblotting (1:1000)               | Mouse              | BD Biosciences |
| PAI-1 (C-9)                                           | SC-5297 lot: K1308 | Immunohistochemistry (1:50)           | Mouse              | Santa Cruz     |
| Myc (9E10)                                            | sc-40              | Immunoblotting (1:1000)               | Mouse              | Santa Cruz     |
| HA (F-7)                                              | sc-7392            | Immunoblotting (1:1000)               | Mouse              | Santa Cruz     |
| Flag (M2)                                             | F3165              | Immunoblotting (1:5000)               | Mouse              | Sigma          |
|                                                       |                    | Immunoprecipitation (1:1000)          |                    |                |
| $\alpha$ -tubulin                                     | T5168              | Immunoblotting (1:5000)               | Mouse              | Sigma          |
| Normal mouse IgG                                      | sc-2025            | Immunoprecipitation (1:200)           | Mouse              | Santa Cruz     |
| normal rabbit IgG                                     | sc-2027            | Immunoprecipitation (1:200)           | Rabbit             | Santa Cruz     |

**Supplementary Table 3.** A list of Secondary Antibodies used

| Antibody                                             | Catalog number | Dilution                | Supplier  |
|------------------------------------------------------|----------------|-------------------------|-----------|
| Goat Anti-Mouse IgG Antibody, Peroxidase Conjugated  | AP124P         | Immunoblotting (1:5000) | Millipore |
| Goat Anti-Rabbit IgG Antibody, Peroxidase Conjugated | AP132P         | Immunoblotting (1:5000) | Millipore |

**Supplementary Table 4.** A list of 100 isoform switches found in ESRP1-low versus ESRP-high cell lines

| Gene                                       |                                            | Correlation in tissue samples                   |                                         |                                         | Correlation in cell lines                       |                                                     |                                                     |
|--------------------------------------------|--------------------------------------------|-------------------------------------------------|-----------------------------------------|-----------------------------------------|-------------------------------------------------|-----------------------------------------------------|-----------------------------------------------------|
| isoform 1                                  | isoform 2                                  | correlation (isoform1) - correlation (isoform2) | correlation between isoform 1 and ESRP1 | correlation between isoform 2 and ESRP1 | correlation (isoform1) - correlation (isoform2) | correlation between isoform 1 and ESRP1 (cell line) | correlation between isoform 2 and ESRP1 (cell line) |
| LRRFIP2,NM_017724                          | LRRFIP2,NM_001134369                       | 1.381752178                                     | 0.688443474                             | -0.693308704                            | 0.97379806                                      | 0.497312109                                         | -0.476485951                                        |
| CCDC50,NM_178335                           | CCDC50,NM_174908                           | 1.31241368                                      | 0.65620684                              | -0.65620684                             | 1.406426626                                     | 0.703213313                                         | -0.703213313                                        |
| CD47,NM_001777                             | CD47,NM_198793                             | 1.29059511                                      | 0.645297555                             | -0.645297555                            | 0.915481284                                     | 0.457740642                                         | -0.457740642                                        |
| BICD2,NM_001003800                         | BICD2,NM_015250                            | 1.265403536                                     | 0.632701768                             | -0.632701768                            | 1.046785009                                     | 0.523392504                                         | -0.523392504                                        |
| HRH1,NM_001098211                          | HRH1,NM_001098212                          | 1.164102405                                     | 0.660633845                             | -0.50346856                             | 0.231277771                                     | 0.173664847                                         | -0.057612924                                        |
| PLEKHA1,NM_001001974                       | PLEKHA1,NM_001195608                       | 1.125816513                                     | 0.709199383                             | -0.41661713                             | 0.080604319                                     | -0.475125094                                        | -0.555729413                                        |
| ATL1,NM_001127713                          | ATL1,NM_181598                             | 1.119446089                                     | 0.557190701                             | -0.562255388                            | 0.570742853                                     | 0.285705498                                         | -0.285037355                                        |
| MYH14,NM_001077186                         | MYH14,NM_024729                            | 1.083237132                                     | 0.558239648                             | -0.524997483                            | 1.159997053                                     | 0.602228286                                         | -0.557768767                                        |
| MYOF,NM_133337                             | MYOF,NM_013451                             | 1.077609438                                     | 0.538804719                             | -0.538804719                            | 1.299430112                                     | 0.649715056                                         | -0.649715056                                        |
| DNM2,NM_001005360                          | DNM2,NM_001005362                          | 0.990115359                                     | 0.279221697                             | -0.710893661                            | 1.235540909                                     | 0.604536625                                         | -0.631004284                                        |
| GAB1,NM_002039                             | GAB1,NM_207123                             | 0.98902836                                      | 0.49451418                              | -0.49451418                             | 1.140428091                                     | 0.570214046                                         | -0.570214046                                        |
| CD44,NM_001001389                          | CD44,NM_001001391                          | 0.938275914                                     | 0.44830022                              | -0.489975694                            | 0.659375411                                     | 0.155354777                                         | -0.50420634                                         |
| MARVELD3,NM_001017967                      | MARVELD3,NM_001271329                      | 0.918941779                                     | 0.427900465                             | -0.491041314                            | 0.683053341                                     | 0.221679828                                         | -0.461373512                                        |
| VGLL4,NM_014667                            | VGLL4,NM_001128219                         | 0.869398651                                     | 0.444741848                             | -0.424656803                            | 1.598219406                                     | 0.799988203                                         | -0.798231203                                        |
| ARMCX5:ARMCX5-GPRASP2:GPRASP2,NM_001168482 | ARMCX5:ARMCX5-GPRASP2:GPRASP2,NM_001004051 | 0.843486267                                     | 0.597395443                             | -0.246090824                            | 0.479075777                                     | 0.116839362                                         | -0.362236415                                        |
| PDGFA,NM_002607                            | PDGFA,NM_033023                            | 0.836493828                                     | 0.418246914                             | -0.418246914                            | 0.980246431                                     | 0.490123216                                         | -0.490123216                                        |
| TACC2,NM_001291876                         | TACC2,NM_006997                            | 0.834665253                                     | 0.555003295                             | -0.279661958                            | 0.697197186                                     | 0.429700534                                         | -0.267496652                                        |
| GNAI2,NM_001282620                         | GNAI2,NM_001282618                         | 0.767006191                                     | 0.510066261                             | -0.25693993                             | 0.533419264                                     | 0.372088972                                         | -0.161330291                                        |
| ZNF33A,NM_001278179                        | ZNF33A,NM_001278171                        | 0.747989479                                     | 0.497600802                             | -0.250388677                            | 0.127577486                                     | 0.196507963                                         | 0.068930477                                         |
| NF2,NM_181825                              | NF2,NM_181829                              | 0.742338389                                     | 0.732358229                             | -0.009980159                            | 0.368851696                                     | 0.074493053                                         | -0.294358643                                        |
| CLDN12,NM_001185073                        | CLDN12,NM_001185072                        | 0.729467261                                     | 0.406240353                             | -0.323226908                            | 1.247764587                                     | 0.573032636                                         | -0.674731951                                        |
| STX2,NM_194356                             | STX2,NM_001980                             | 0.675828879                                     | 0.337914439                             | -0.337914439                            | 0.284512399                                     | 0.1422562                                           | -0.1422562                                          |
| SERINC2,NM_001199039                       | SERINC2,NM_001199038                       | 0.668356918                                     | 0.553273596                             | -0.115083322                            | 0.853048769                                     | 0.455292934                                         | -0.397755835                                        |
| NUMB,NM_001005743                          | NUMB,NM_001005744                          | 0.659357802                                     | 0.338673818                             | -0.320683984                            | 0.322758787                                     | -0.214672474                                        | -0.537431261                                        |
| FGFR2,NM_022970                            | FGFR2,NM_001144918                         | 0.648327015                                     | 0.306532115                             | -0.341794901                            | 0.661580641                                     | 0.377373587                                         | -0.284207054                                        |
| SLAIN1,NM_001242869                        | SLAIN1,NM_001242870                        | 0.592722499                                     | 0.641646541                             | 0.048924042                             | 0.304824393                                     | 0.035316431                                         | -0.269507962                                        |
| SH3YL1,NM_015677                           | SH3YL1,NM_001282682                        | 0.579141757                                     | 0.13070577                              | -0.448435986                            | 0.9333773                                       | 0.496000402                                         | -0.437376898                                        |
| ERBB2IP,NM_001253699                       | ERBB2IP,NM_001006600                       | 0.562702039                                     | 0.31816139                              | -0.244540649                            | 0.776015576                                     | 0.420849154                                         | -0.355166423                                        |
| GPR56,NM_001145770                         | GPR56,NM_001145771                         | 0.54026628                                      | 0.223077227                             | -0.317189053                            | 1.105754357                                     | 0.731364509                                         | -0.374389848                                        |
| ZNF280D,NM_001288588                       | ZNF280D,NM_001288589                       | 0.519266469                                     | 0.489038838                             | -0.030227631                            | 0.47693259                                      | 0.160334497                                         | -0.316598092                                        |
| MORF4L2,NM_001142426                       | MORF4L2,NM_001142432                       | 0.50881448                                      | 0.182340594                             | -0.326473886                            | 0.573266804                                     | 0.114465713                                         | -0.458801092                                        |
| EDRF1,NR_110858                            | EDRF1,NM_0015608                           | 0.413307694                                     | 0.051676304                             | -0.36163139                             | 0.677502378                                     | 0.144364558                                         | -0.53313782                                         |
| RAI14,NM_001145520                         | RAI14,NM_001145522                         | 0.398392409                                     | -0.110944989                            | -0.509337398                            | 0.580295183                                     | 0.117596548                                         | -0.462698635                                        |
| FGFR3,NM_022965                            | FGFR3,NM_000142                            | 0.392002542                                     | 0.139675844                             | -0.252326698                            | 0.986793244                                     | 0.354525035                                         | -0.632268209                                        |
| MAST4,NM_001297651                         | MAST4,NM_015183                            | 0.386556905                                     | 0.223155865                             | -0.16340104                             | 0.240474957                                     | -0.053837915                                        | -0.294312871                                        |
| SGOL1,NM_001012409                         | SGOL1,NM_001012413                         | 0.344519726                                     | 0.178957533                             | -0.165562193                            | 0.656838301                                     | 0.160816796                                         | -0.496021505                                        |
| ZNHIT3,NM_001281432                        | ZNHIT3,NR_104011                           | 0.343772407                                     | 0.148524257                             | -0.195248151                            | 0.429322573                                     | 0.08351208                                          | -0.345810493                                        |
| PAX6,NM_001258462                          | PAX6,NM_000280                             | 0.340637437                                     | -0.181314127                            | -0.521951564                            | 0.095395432                                     | 0.256410758                                         | 0.161015326                                         |
| TRAK1,NM_001265610                         | TRAK1,NM_001265608                         | 0.334937827                                     | 0.135506945                             | -0.199430882                            | 0.434323554                                     | -0.022605644                                        | -0.456929198                                        |
| MUC1,NM_001204293                          | MUC1,NM_002456                             | 0.325973823                                     | 0.066986047                             | -0.258987776                            | 0.457620041                                     | 0.446704993                                         | -0.010915048                                        |
| BAIAP2,NM_006340                           | BAIAP2,NM_001144888                        | 0.313617581                                     | -0.353127129                            | -0.66674471                             | 0.97966345                                      | 0.559243108                                         | -0.420420342                                        |
| ZNF419,NM_001098494                        | ZNF419,NM_024691                           | 0.2842207                                       | -0.095645732                            | -0.379866432                            | 0.057374084                                     | 0.118253169                                         | 0.060879085                                         |
| PTGES3,NM_001282604                        | PTGES3,NR_104219                           | 0.27213726                                      | 0.179404518                             | -0.092732742                            | 0.576332206                                     | 0.386174829                                         | -0.190157376                                        |
| HNF1B,NM_000458                            | HNF1B,NM_001165923                         | 0.248038379                                     | 0.12401919                              | -0.12401919                             | 0.583168929                                     | 0.291584465                                         | -0.291584465                                        |
| FAM107B,NM_001282696                       | FAM107B,NM_001282700                       | 0.246992276                                     | 0.022745305                             | -0.224246972                            | 1.081294532                                     | 0.588554602                                         | -0.49273993                                         |
| PGAP2,NR_104272                            | PGAP2,NR_045927                            | 0.243239603                                     | 0.092139975                             | -0.151099627                            | 0.283897984                                     | 0.048812826                                         | -0.235085158                                        |
| CSF1,NM_172211                             | CSF1,NM_172212                             | 0.209004226                                     | 0.226610866                             | 0.01760664                              | 0.896973272                                     | 0.512872487                                         | -0.384100785                                        |
| PHLDB1,NM_001144758                        | PHLDB1,NM_015157                           | 0.203227285                                     | 0.085417447                             | -0.117809838                            | 0.386429908                                     | -0.069493487                                        | -0.455923395                                        |
| ANAPC10,NM_001256711                       | ANAPC10,NM_001256709                       | 0.197061163                                     | 0.062768286                             | -0.134292876                            | 0.50482574                                      | 0.071846247                                         | -0.432979493                                        |
| ZNF180,NM_013256                           | ZNF180,NM_001278508                        | 0.192263196                                     | 0.46443063                              | 0.272167434                             | 0.262506022                                     | -0.089458301                                        | -0.351964324                                        |
| BCL2L11,NM_001204106                       | BCL2L11,NM_001204111                       | 0.161608971                                     | -0.02355055                             | -0.185159521                            | 0.4164055                                       | 0.172985061                                         | -0.243420439                                        |
| GSN,NM_001258030                           | GSN,NM_001258029                           | 0.15425994                                      | -0.206503523                            | -0.360763463                            | 0.379230254                                     | 0.009914304                                         | -0.36931595                                         |
| CTNND1:TMX2:TMX2-CTNND1,NM_001085463       | CTNND1:TMX2:TMX2-CTNND1,NM_001206889       | 0.14559481                                      | -0.287559045                            | -0.433153856                            | 1.100917996                                     | 0.614690151                                         | -0.486227846                                        |
| SLC44A3,NM_152369                          | SLC44A3,NM_001258342                       | 0.142742336                                     | 0.025671046                             | -0.117071289                            | 0.348329067                                     | -0.111643252                                        | -0.459972319                                        |

**Supplementary Table 4. A list of 100 isoform switches found in ESRP1-low versus ESRP-high cell lines-Continued**

| Gene                                         |                                           | Correlation in tissue samples                   |                                         |                                         | Correlation in cell lines                       |                                                     |                                                     |
|----------------------------------------------|-------------------------------------------|-------------------------------------------------|-----------------------------------------|-----------------------------------------|-------------------------------------------------|-----------------------------------------------------|-----------------------------------------------------|
| isoform 1                                    | isoform 2                                 | correlation (isoform1) - correlation (isoform2) | correlation between isoform 1 and ESRP1 | correlation between isoform 2 and ESRP1 | correlation (isoform1) - correlation (isoform2) | correlation between isoform 1 and ESRP1 (cell line) | correlation between isoform 2 and ESRP1 (cell line) |
| SYTL2,NM_001162953                           | SYTL2,NM_032943                           | 0.118023882                                     | 0.611557921                             | 0.493534039                             | 0.841960542                                     | 0.511177868                                         | -0.330782674                                        |
| NFATC2,NM_001258294                          | NFATC2,NM_001258295                       | 0.118002002                                     | -0.413217025                            | -0.531219027                            | 0.795169081                                     | 0.406546273                                         | -0.388622808                                        |
| CLIP4,NM_001287527                           | CLIP4,NM_001287528                        | 0.114427503                                     | -0.109589435                            | -0.224016938                            | 0.349369229                                     | 0.215455109                                         | -0.13391412                                         |
| ARHGAP8:PRR5:ARHGAP8,NM_015366               | ARHGAP8:PRR5:PRR5-ARHGAP8,NM_001017528    | 0.106488007                                     | 0.162544274                             | 0.056056267                             | 0.755064754                                     | 0.473704156                                         | -0.281360598                                        |
| FAM86B3P,NR_024362                           | FAM86B3P,NR_024363                        | 0.099321256                                     | 0.632918085                             | 0.533596829                             | 0.850099957                                     | 0.371689368                                         | -0.47841059                                         |
| MYB,NM_001130172                             | MYB,NM_001130173                          | 0.081797403                                     | 0.02501324                              | -0.056784163                            | 0.859839182                                     | 0.520512986                                         | -0.339326196                                        |
| MIER1,NM_001077702                           | MIER1,NM_001146111                        | 0.066707574                                     | -0.195339887                            | -0.262047462                            | 0.566734178                                     | -0.037453525                                        | -0.604187703                                        |
| POLL,NR_033406                               | POLL,NM_001174085                         | 0.037896954                                     | -0.098539793                            | -0.136436747                            | 0.836594715                                     | 0.317787188                                         | -0.518807527                                        |
| GNAL,NM_001142339                            | GNAL,NM_182978                            | 0.023850669                                     | -0.008208546                            | -0.032059215                            | 0.517401911                                     | -0.020654747                                        | -0.538056658                                        |
| NEDD4,NM_001284340                           | NEDD4,NM_001284338                        | -0.009779382                                    | -0.10070794                             | -0.090928558                            | 0.078782549                                     | -0.054679337                                        | -0.133461886                                        |
| TCF7L2,NM_001146286                          | TCF7L2,NM_001198529                       | -0.032888396                                    | -0.381714213                            | -0.348825817                            | 0.181173222                                     | -0.347849244                                        | -0.529022467                                        |
| RABGAP1L,NM_001035230                        | RABGAP1L,NM_001243763                     | -0.051898071                                    | -0.055579238                            | -0.003681168                            | 0.391162983                                     | 0.501701346                                         | 0.110538363                                         |
| ADORA2A:SPECC1L:SPECC1L-ADORA2A,NM_001278500 | ADORA2A:SPECC1L:SPECC1L-ADORA2A,NR_103543 | -0.058926059                                    | -0.33963977                             | -0.280713712                            | 0.839317367                                     | 0.573245444                                         | -0.266071923                                        |
| DNMT3B,NM_175848                             | DNMT3B,NM_175849                          | -0.066730022                                    | 0.202001053                             | 0.268731075                             | 1.394563017                                     | 0.741498816                                         | -0.653064201                                        |
| TMEM254,NR_072986                            | TMEM254,NM_001270373                      | -0.066760582                                    | -0.121289335                            | -0.054528753                            | 0.420130282                                     | 0.115847747                                         | -0.304282535                                        |
| TSPAN4,NM_001025237                          | TSPAN4,NM_001025239                       | -0.078033756                                    | -0.148875512                            | -0.070841755                            | 0.379761615                                     | -0.036501841                                        | -0.416263456                                        |
| BIVM:BIVM-ERCC5:ERCC5,NM_01204425            | BIVM:BIVM-ERCC5:ERCC5,NM_017693           | -0.148120497                                    | -0.249043487                            | -0.100922991                            | 0.570071295                                     | -0.08785236                                         | -0.657923655                                        |
| CLCN3,NM_001243374                           | CLCN3,NM_173872                           | -0.18692416                                     | 0.203321985                             | 0.390246145                             | 1.048589322                                     | 0.688247814                                         | -0.360341508                                        |
| JAM3,NM_001205329                            | JAM3,NM_032801                            | -0.209854781                                    | -0.10492739                             | 0.10492739                              | 0.57608427                                      | 0.288042135                                         | -0.288042135                                        |
| TNFSF12:TNFSF12-TNFSF13:TNFSF13,NM_001198624 | TNFSF12:TNFSF12-TNFSF13:TNFSF13,NR_073490 | -0.266984445                                    | -0.338641077                            | -0.071656632                            | 0.919308994                                     | 0.592412623                                         | -0.326896371                                        |
| ZEB1,NM_001174093                            | ZEB1,NM_030751                            | -0.284499007                                    | -0.368059885                            | -0.083560877                            | 1.001611096                                     | 0.67214912                                          | -0.329461976                                        |
| YAP1,NM_001282099                            | YAP1,NM_001282100                         | -0.290617779                                    | -0.116314796                            | 0.174302983                             | 0.752852435                                     | 0.118064654                                         | -0.634787781                                        |
| C19orf48,NM_001290154                        | C19orf48,NM_001290153                     | -0.316398197                                    | -0.284106808                            | 0.032291389                             | 0.516078677                                     | 0.084240409                                         | -0.431838268                                        |
| CARD8,NM_001184900                           | CARD8,NR_033679                           | -0.318545104                                    | 0.068865907                             | 0.387411011                             | 0.110670824                                     | 0.257698629                                         | 0.147027804                                         |
| BGLAP:PMF1:PMF1-BGLAP,NM_001199654           | BGLAP:PMF1:PMF1-BGLAP,NM_001199662        | -0.327168399                                    | -0.280117905                            | 0.047050495                             | 0.396686703                                     | 0.309985661                                         | -0.086701041                                        |
| STPG1,NM_001199014                           | STPG1,NM_001199012                        | -0.331156459                                    | -0.413467754                            | -0.082311295                            | 0.400851656                                     | 0.120254409                                         | -0.280597247                                        |
| TRMT112,NM_001286082                         | TRMT112,NM_001286084                      | -0.346783114                                    | -0.21742461                             | 0.129358503                             | 0.648176839                                     | 0.257647772                                         | -0.390529067                                        |
| SERPINB6,NM_001271825                        | SERPINB6,NM_001271824                     | -0.355346865                                    | 0.344065983                             | 0.699412848                             | 0.941832033                                     | 0.315847521                                         | -0.625984512                                        |
| FRS2,NM_001278357                            | FRS2,NM_001278354                         | -0.400479023                                    | -0.302587606                            | 0.097891418                             | 0.581091484                                     | 0.052106512                                         | -0.528984972                                        |
| CACNA1G,NR_046055                            | CACNA1G,NM_198382                         | -0.412156978                                    | -0.215882279                            | 0.196274698                             | 1.123579417                                     | 0.647605143                                         | -0.475974274                                        |
| CEACAM1,NM_001205344                         | CEACAM1,NM_001184816                      | -0.426787325                                    | -0.432452425                            | -0.005665099                            | 0.648012166                                     | 0.403500849                                         | -0.244511317                                        |
| IL17RC,NM_153460                             | IL17RC,NM_001203264                       | -0.46668526                                     | -0.255344992                            | 0.211340269                             | 0.12247427                                      | 0.344347101                                         | 0.221872831                                         |
| SLC38A9,NR_047649                            | SLC38A9,NM_001258286                      | -0.514651841                                    | -0.103256954                            | 0.411394887                             | -0.045613872                                    | 0.108116968                                         | 0.15373084                                          |
| FKBP9P1,NR_027340                            | FKBP9P1,NR_027342                         | -0.541457841                                    | -0.024511228                            | 0.516946614                             | 0.769311704                                     | 0.302679689                                         | -0.466632015                                        |
| INPP4A,NM_001134224                          | INPP4A,NM_001566                          | -0.5541761                                      | 0.080774206                             | 0.634950306                             | 0.414822563                                     | 0.379036604                                         | -0.035785959                                        |
| EHF,NM_001206615                             | EHF,NM_001206616                          | -0.635873914                                    | -0.285450461                            | 0.350423453                             | 0.722896115                                     | 0.100904286                                         | -0.62199183                                         |
| SLC16A3,NM_001042422                         | SLC16A3,NM_004207                         | -0.646284949                                    | -0.205842567                            | 0.440442382                             | 0.740352901                                     | 0.355663289                                         | -0.384689612                                        |
| SCO2:TYMP,NM_001169110                       | SCO2:TYMP,NM_001169109                    | -0.659797765                                    | -0.330387185                            | 0.329410579                             | 0.219198663                                     | -0.00179384                                         | -0.220992503                                        |
| TMEM98,NM_015544                             | TMEM98,NM_001033504                       | -0.684523496                                    | -0.339580509                            | 0.344942987                             | 1.259811134                                     | 0.627081132                                         | -0.632730002                                        |
| RGL2,NM_001243738                            | RGL2,NM_004761                            | -0.84094588                                     | -0.42047294                             | 0.42047294                              | 1.19164992                                      | 0.59582496                                          | -0.59582496                                         |
| NMNAT3,NM_178177                             | NMNAT3,NM_001200047                       | -0.990270401                                    | -0.495135198                            | 0.495135203                             | 0.999606913                                     | 0.499803456                                         | -0.499803456                                        |
| ARHGAP17,NM_018054                           | ARHGAP17,NM_001006634                     | -1.056036012                                    | -0.528018006                            | 0.528018006                             | 1.451719527                                     | 0.725859764                                         | -0.725859764                                        |
| LFNG,NM_002304                               | LFNG,NM_001040167                         | -1.167760479                                    | -0.586560135                            | 0.581200344                             | 0.863604327                                     | 0.420468167                                         | -0.44313616                                         |
| PRR3,NM_025263                               | PRR3,NM_001077497                         | -1.257194981                                    | -0.628597491                            | 0.628597491                             | 1.013544633                                     | 0.506772317                                         | -0.506772317                                        |
| LIMK1,NM_001204426                           | LIMK1,NM_002314                           | -1.508211368                                    | -0.754105684                            | 0.754105684                             | 0.37106421                                      | 0.185532105                                         | -0.185532105                                        |



**Supplementary Table 5. A list of significant isoform switches (p-value<0.05 & absolute Relative expression median delta>0.1) of event type Alternative 3' Splice Sites (A3) found in ESRP1-low versus ESRP-high cell lines using two-sided Wilcoxon test**

| Event name                                                                       | Relative expression median delta | Wilcoxon p-value of relative expression |
|----------------------------------------------------------------------------------|----------------------------------|-----------------------------------------|
| TMC4;A3:chr19:54675870-54676734:54675852-54676734:-                              | -0.368975302                     | 0.000835477                             |
| MYEOV;A3:chr11:69062043-69062700:69062043-69062868:+                             | 0.175269814                      | 0.001060553                             |
| CEP170;A3:chr1:243319757-243327586:243319649-243327586:-                         | 0.109013192                      | 0.001340641                             |
| FAM101A;ZNF664:ZNF664-FAM101A;A3:chr12:124458567-124472590:124458567-124472593:+ | 0.112249386                      | 0.001340641                             |
| SYTL2;A3:chr11:85447658-85448618:85447655-85448618:-                             | 0.530248049                      | 0.001687636                             |
| CYB561A3;A3:chr11:61117894-61118463:61117115-61118463:-                          | -0.685502819                     | 0.002641098                             |
| HCFC1R1;A3:chr16:3073531-3073848:3073413-3073848:-                               | 0.354163556                      | 0.002641098                             |
| PHOSPHO1;A3:chr17:47302493-47304009:47302366-47304009:-                          | 0.25883199                       | 0.002699796                             |
| GRK6;A3:chr5:176868054-176868736:176868054-176868738:+                           | -0.15186873                      | 0.003283461                             |
| CDK13;A3:chr7:40127930-40132384:40127930-40132564:+                              | 0.116843848                      | 0.003283461                             |
| MKMK2;A3:chr19:2039855-2040133:2037828-2040133:-                                 | 0.232890724                      | 0.003283461                             |
| CSF1;A3:chr1:110464616-110465788:110464616-110466682:+                           | -0.366687246                     | 0.005012287                             |
| SHOX2;A3:chr3:157816109-157817649:157816073-157817649:-                          | 0.322732964                      | 0.005286959                             |
| HEPH;A3:chrX:65483530-65486282:65483530-65486285:+                               | 0.110768722                      | 0.005510642                             |
| LOC113230;A3:chr19:14184689-14185137:14184689-14185202:+                         | -0.222427887                     | 0.007526315                             |
| VPS45;A3:chr1:150040007-150040667:150040007-150040687:+                          | 0.152118252                      | 0.007526315                             |
| SECISBP2;A3:chr9:91934712-91940342:91934712-91940463:+                           | 0.165883502                      | 0.007526315                             |
| MYEOV;A3:chr11:69062043-69062794:69062043-69062868:+                             | 0.166142741                      | 0.007526315                             |
| BZRAP1-AS1;A3:chr17:56415040-56429096:56415040-56429105:+                        | 0.25929932                       | 0.007526315                             |
| DLG1;A3:chr3:196803556-196807922:196803553-196807922:-                           | -0.139155209                     | 0.009166074                             |
| LOC100506990;A3:chr8:12296020-12298478:12296020-12298509:+                       | 0.18615473                       | 0.009166074                             |
| EXOC7;A3:chr17:74086562-74087224:74086478-74087224:-                             | 0.253942979                      | 0.009166074                             |
| FAM156A;A3:chrX:52985953-52986286:52985544-52986286:-                            | -0.220457739                     | 0.011117561                             |
| MSTO1:MSTO2P;A3:chr1:155583524-155583850:155583524-155583853:+                   | -0.190773644                     | 0.011117561                             |
| BAZ2B;A3:chr2:160304920-160310124:160304914-160310124:-                          | 0.131498099                      | 0.011117561                             |
| ALS2CL;A3:chr3:46717466-46717735:46717176-46717735:-                             | 0.137674548                      | 0.011117561                             |
| GTF2I;A3:chr7:74125440-74129177:74125440-74129180:+                              | 0.145075462                      | 0.011117561                             |
| REEP2;A3:chr5:137780556-137780917:137780556-137780923:+                          | -0.324831394                     | 0.011194752                             |
| GLRX;A3:chr5:95150661-95152211:95150511-95152211:-                               | -0.531936481                     | 0.012192849                             |
| OLFML2B;A3:chr1:161970131-161976087:161970128-161976087:-                        | 0.499501713                      | 0.012826694                             |
| ESR2;A3:chr14:64694647-64701688:64694332-64701688:-                              | 0.502097602                      | 0.013429696                             |
| P2RX2;A3:chr12:133196505-133196586:133196505-133196621:+                         | 0.188435481                      | 0.014305878                             |
| CACNA1G;A3:chr17:48684350-48685263:48684350-48685290:+                           | 0.164924594                      | 0.015018591                             |
| HHLA2;A3:chr3:108070724-108072274:108070724-108072536:+                          | -0.404218018                     | 0.015806775                             |
| LIMA1;A3:chr12:50586347-50589613:50586344-50589613:-                             | -0.272885398                     | 0.016156931                             |
| TM2D2;A3:chr8:38853313-38853732:38852924-38853732:-                              | 0.182334009                      | 0.016156931                             |
| PAXIP1-AS2;A3:chr7:154738203-154738303:154738203-154738350:+                     | 0.542502941                      | 0.016156931                             |
| TCF4;A3:chr18:53018234-53070685:53018231-53070685:-                              | -0.227525074                     | 0.017021868                             |
| CACNA1G;A3:chr17:48684350-48685263:48684350-48685269:+                           | 0.254302699                      | 0.018204132                             |
| IRF4;A3:chr6:395935-397108:395935-397111:+                                       | -0.342014607                     | 0.019016474                             |
| MUTYH;A3:chr1:45799233-45800063:45799169-45800063:-                              | -0.137947837                     | 0.019359467                             |
| LTBP4;A3:chr19:41105161-41105308:41105161-41105327:+                             | 0.265207871                      | 0.019359467                             |
| CNTF;ZFP91:ZFP91-CNTF;A3:chr11:58377807-58378423:58377807-58378426:+             | 0.502040455                      | 0.019359467                             |
| CES1;A3:chr16:55862886-55866916:55862883-55866916:-                              | 0.12292656                       | 0.020921335                             |
| ARMC12;A3:chr6:35715424-35716315:35715424-35716345:+                             | -0.360354057                     | 0.022990394                             |
| FAM188B;INMT:INMT-FAM188B;A3:chr7:30791920-30793347:30791920-30793350:+          | -0.499365256                     | 0.023103394                             |
| GAS8;A3:chr16:90094130-90097584:90094130-90097707:+                              | 0.114638033                      | 0.023103394                             |
| PPP1R3F;A3:chrX:49137924-49138444:49137924-49138447:+                            | 0.268196079                      | 0.023103394                             |
| C1S;A3:chr12:7168181-7169056:7168181-7169143:+                                   | -0.28662433                      | 0.025211843                             |
| SH2D2A;A3:chr1:156785886-156786467:156785855-156786467:-                         | -0.173778084                     | 0.026285452                             |
| CRHR2;A3:chr7:30705255-30706844:30705252-30706844:-                              | -0.196324441                     | 0.026453399                             |
| DLGAP1;A3:chr18:3582246-3729135:3582162-3729135:-                                | 0.218659254                      | 0.027166252                             |
| PTGES2;A3:chr9:130886130-130886771:130886126-130886771:-                         | -0.222695225                     | 0.027460744                             |
| LMBR1L;A3:chr12:49495106-49495255:49495046-49495255:-                            | -0.202025397                     | 0.027460744                             |
| ARHGAP33;A3:chr19:36276385-36277315:36276385-36277798:+                          | 0.124956562                      | 0.027460744                             |
| MIB2;A3:chr1:1551994-1558769:1551994-1558811:+                                   | 0.228408659                      | 0.027460744                             |
| LOC493754;A3:chr7:66041919-66057244:66041916-66057244:-                          | 0.352710703                      | 0.027460744                             |
| GPR56;A3:chr16:57662714-57675499:57662714-57675503:+                             | 0.643537439                      | 0.027460744                             |
| AP1M2;A3:chr19:10690540-10691942:10690534-10691942:-                             | -0.279667612                     | 0.029272509                             |
| DDX11;A3:chr12:31226903-31231324:31226903-31231397:+                             | -0.555774519                     | 0.032509445                             |
| CCDC51;A3:chr3:48476546-48481506:48476425-48481506:-                             | -0.296622414                     | 0.032509445                             |
| TCF19;A3:chr6:31126499-31126674:31126499-31126920:+                              | -0.128153573                     | 0.032509445                             |
| PXK;A3:chr3:58395886-58398628:58395886-58398631:+                                | -0.103708706                     | 0.032509445                             |
| GUCY1B3;A3:chr4:156721226-156723365:156721226-156723593:+                        | -0.55721308                      | 0.038984854                             |
| GHRL;A3:chr3:10333135-10334526:10332674-10334526:-                               | 0.389084454                      | 0.035296597                             |
| SLC29A1;A3:chr6:44193904-44194997:44193904-44195000:+                            | -0.230354182                     | 0.038333139                             |
| MCM8;A3:chr20:5948233-5948476:5948233-5948524:+                                  | -0.129877743                     | 0.038333139                             |
| MECR;A3:chr1:29543324-29557243:29543197-29557243:-                               | 0.17211422                       | 0.038333139                             |
| TXNDC12;A3:chr1:52499723-52507209:52499600-52507209:-                            | 0.509828199                      | 0.038333139                             |
| C6orf48;A3:chr6:31803228-31804190:31803228-31804204:+                            | 0.756450757                      | 0.038333139                             |
| CSorf38;A3:chr5:2752578-2752736:2752578-2752794:+                                | 0.174400923                      | 0.038765574                             |
| DHRS4L1;A3:chr14:24505837-24507533:24505837-24507616:+                           | -0.137342271                     | 0.039110519                             |
| COL6A2;A3:chr21:47546455-47548817:47546455-47549110:+                            | 0.122660653                      | 0.040423979                             |
| FAM213B;A3:chr1:2519892-2520393:2519892-2520396:+                                | -0.326962381                     | 0.045020881                             |
| BTN3A1;A3:chr6:26411809-26412640:26411809-26412933:+                             | -0.192950114                     | 0.045020881                             |
| ICA1;A3:chr7:8272385-8275540:8272382-8275540:-                                   | -0.178886939                     | 0.045020881                             |
| HSF4;A3:chr16:67201125-67201364:67201125-67201378:+                              | -0.165609411                     | 0.045020881                             |
| DCAF11;A3:chr14:24584958-24586126:24584958-24586181:+                            | -0.113181139                     | 0.045020881                             |
| ZNF142;A3:chr2:219523853-219524092:219523758-219524092:-                         | -0.1096334                       | 0.045020881                             |
| HSF4;A3:chr16:67201502-67201623:67201502-67201727:+                              | 0.165609411                      | 0.045020881                             |
| LETM2;A3:chr8:38250513-38251616:38250513-38251701:+                              | 0.279803326                      | 0.045020881                             |
| SLC44A3;A3:chr1:95330455-95332887:95330455-95332890:+                            | -0.139707619                     | 0.046539581                             |
| SLC30A10;A3:chr1:220100485-220101143:220100447-220101143:-                       | -0.552694805                     | 0.049534613                             |
| THPO;A3:chr3:184090954-184091203:184090949-184091203:-                           | -0.501871658                     | 0.049534613                             |
| HNF1B;A3:chr17:36093814-36099431:36093736-36099431:-                             | 0.191205416                      | 0.049534613                             |
| LOC151174;A3:chr2:239135253-239136325:239134140-239136325:-                      | 0.993551792                      | 0.049534613                             |

**Supplementary Table 6. A list of significant isoform switches (p-value<0.05 & absolute Relative expression median delta>0.1) of event type Alternative 5' Splice Sites (A5) found in ESRP1-low versus ESRP-high cell lines using two-sided Wilcoxon test**

| Event name                                                                       | Relative expression median delta | Wilcoxon p-value of relative expression |
|----------------------------------------------------------------------------------|----------------------------------|-----------------------------------------|
| CTNND1:TMX2:TMX2-CTNND1;A5:chr11:57529591-57556509:57529518-57556509:+           | 0.745149798                      | 0.000512005                             |
| ADAM15;A5:chr1:155034593-155034721:155034451-155034721:+                         | -0.144628093                     | 0.000835477                             |
| DSP;A5:chr6:7581802-7582875:7580005-7582875:+                                    | -0.175780314                     | 0.001060553                             |
| SMARCC2;A5:chr12:56557549-56558087:56557549-56558432:-                           | 0.134993701                      | 0.001060553                             |
| CEP170;A5:chr1:243303409-24330588:243303409-243305618:-                          | -0.109013192                     | 0.001340641                             |
| FAM101A:ZNF664:ZNF664-FAM101A;A5:chr12:124457899-124458433:124457850-124458433:+ | 0.110457715                      | 0.001340641                             |
| ODF2;A5:chr9:131223346-131231462:131223289-131231462:+                           | -0.114942381                     | 0.001687636                             |
| XKR9;A5:chr8:71581773-71587053:71581709-71587053:+                               | -0.650453183                     | 0.002115607                             |
| IQGAP2;A5:chr5:75905055-75906845:75905004-75906845:+                             | -0.195516336                     | 0.002843317                             |
| ALDH18A1;A5:chr10:97392806-97393248:97392806-97393254:-                          | -0.248491728                     | 0.003283461                             |
| SMARCB1;A5:chr22:24134081-24135746:24134054-24135746:+                           | -0.121902411                     | 0.00406519                              |
| MDP1:NEDD8:NEDD8-MDP1;A5:chr14:24683357-24683468:24683357-24683516:-             | -0.198905063                     | 0.005012287                             |
| ARPC4:ARPC4-TTL3:TTL3;A5:chr3:9868924-9870644:9868756-9870644:+                  | 0.129793831                      | 0.005012287                             |
| IQCH-AS1;A5:chr15:67811440-67813832:67811440-67813884:-                          | -0.331612914                     | 0.006154624                             |
| C17orf62;A5:chr17:80407356-80408409:80407356-80408576:-                          | -0.235458886                     | 0.006154624                             |
| COPS7A;A5:chr12:6833416-6833780:6833318-6833780:+                                | 0.321918091                      | 0.006154624                             |
| CPFB1;A5:chr15:83221366-8322202:83221366-8322217:-                               | 0.174257513                      | 0.006269685                             |
| MORC4;A5:chrX:106184862-106185168:106184862-106185206:-                          | 0.239157171                      | 0.007526315                             |
| MARVELD3;A5:chr16:71660599-71663270:71660436-71663270:+                          | 0.548785584                      | 0.007526315                             |
| ALS2CL;A5:chr3:46722897-46722990:46722897-46722994:-                             | -0.201829526                     | 0.009166074                             |
| MSTO1:MSTO2P;A5:chr1:155583557-155583853:155583524-155583853:+                   | -0.182526554                     | 0.009166074                             |
| HPS4;A5:chr22:26878206-26879640:26878206-26879731:-                              | 0.108971756                      | 0.009166074                             |
| YTHDF3;A5:chr8:64081670-64081946:64081664-64081946:+                             | 0.450898858                      | 0.009166074                             |
| SLC44A3;A5:chr1:95293199-95294049:95293103-95294049:+                            | -0.37705044                      | 0.009873332                             |
| C1orf210;A5:chr1:43749039-43751115:43749039-43751224:-                           | 0.496928006                      | 0.010810283                             |
| SHISA5;A5:chr3:48538726-48541856:48538726-48542063:-                             | -0.401388926                     | 0.011117561                             |
| ZNF205;A5:chr16:3162951-3163350:3162683-3163350:+                                | -0.197135552                     | 0.011117561                             |
| MAP4K4;A5:chr2:102503723-102504240:102503699-102504240:+                         | -0.150370297                     | 0.011117561                             |
| ZNF202;A5:chr11:123600533-123601195:123600533-123601199:-                        | -0.145888578                     | 0.011117561                             |
| ANAPC11;A5:chr17:79849739-79851428:79849709-79851428:+                           | 0.118938814                      | 0.011117561                             |
| ATP8B3;A5:chr19:1791860-1791970:1791860-1792000:-                                | 0.318405813                      | 0.011117561                             |
| SLC43A3;A5:chr11:57194125-57194359:57194125-57194539:-                           | -0.170307603                     | 0.01144592                              |
| BDNF;A5:chr11:27680132-27741976:27680132-27742191:-                              | 0.21355182                       | 0.01144592                              |
| SDCBP2-AS1;A5:chr20:1306426-1353722:1306173-1353722:+                            | -0.223892708                     | 0.013429696                             |
| P2RX2;A5:chr12:133197174-133197587:133197169-133197587:+                         | -0.161802566                     | 0.014305878                             |
| ZNF501;A5:chr3:44771507-44772968:44771214-44772968:+                             | -0.504133681                     | 0.014886724                             |
| RCAN1;A5:chr21:35896008-35897386:35896008-35897592:-                             | -0.996994186                     | 0.016156931                             |
| FAM107B;A5:chr10:14595386-14613762:14595386-14613923:-                           | -0.178842394                     | 0.016156931                             |
| MAP3K4;A5:chr6:161514883-161518112:161514871-161518112:+                         | -0.142643017                     | 0.016156931                             |
| CYB561D2;A5:chr3:50403288-50403728:50403269-50403728:+                           | -0.129491256                     | 0.016156931                             |
| PDE4DIP;A5:chr1:144881622-144882446:144881622-144882776:-                        | 0.206743123                      | 0.016156931                             |
| NR2F1-AS1;A5:chr5:92899169-92916173:92899169-92916848:-                          | -0.281507859                     | 0.018204132                             |
| CACNA1G;A5:chr17:48685401-48692722:48685380-48692722:+                           | 0.51698209                       | 0.018204132                             |
| PEX5;A5:chr12:7342812-7342958:7342576-7342958:+                                  | -0.401864121                     | 0.019359467                             |
| PICK1;A5:chr22:38453594-38453760:38453496-38453760:+                             | -0.275306403                     | 0.019359467                             |
| SSX2IP;A5:chr1:85146070-85155837:85146070-85156054:-                             | -0.255146678                     | 0.019359467                             |
| MAPK7;A5:chr17:19281943-19282209:19281855-19282209:+                             | -0.24735815                      | 0.019359467                             |
| POLL;A5:chr10:103343438-103344359:103343438-103344635:-                          | 0.104738576                      | 0.019359467                             |
| BTF;A5:chr17:65942441-65943842:65942012-65943842:+                               | 0.127484689                      | 0.019359467                             |
| PQBP1;A5:chrX:48755365-48755775:48755297-48755775:+                              | 0.147379218                      | 0.019359467                             |
| FAM104B;A5:chrX:55172744-55185555:55172744-55185559:-                            | 0.224245152                      | 0.019359467                             |
| BCS1L;A5:chr2:219524968-219525662:219524889-219525662:+                          | 0.264353611                      | 0.019359467                             |
| ELOVL5;A5:chr6:53160505-53213148:53160505-53213615:-                             | 0.165814532                      | 0.019404627                             |
| CHN2;A5:chr7:29519972-29535568:29519837-29535568:+                               | 0.257050762                      | 0.019517481                             |
| ELN;A5:chr7:73470765-73471002:73470687-73471002:+                                | -0.21086514                      | 0.020637558                             |
| CYP4F3;A5:chr19:15751755-15752225:15751739-15752225:+                            | -0.18365933                      | 0.020716612                             |
| ZNF180;A5:chr19:45001424-45004250:45001424-45004327:-                            | -0.720973205                     | 0.023103394                             |
| BCL2L1;A5:chr20:30253889-30309458:30253889-30309647:-                            | -0.169176575                     | 0.023103394                             |
| TANGO2;A5:chr22:20049206-20050861:20049204-20050861:+                            | -0.123527902                     | 0.023103394                             |
| RNF146;A5:chr6:127588240-127601376:127588070-127601376:+                         | -0.112101359                     | 0.023103394                             |
| CCDC90B;A5:chr11:82991303-82996916:82991303-82997143:-                           | 0.107715011                      | 0.023103394                             |
| SENP1;A5:chr12:48495299-48499185:48495299-48499240:-                             | 0.136889646                      | 0.023103394                             |
| NCOR2;A5:chr12:124810916-124811955:124810916-124812093:-                         | 0.169937318                      | 0.023103394                             |
| PPP1R3F;A5:chrX:49127336-49137869:49126396-49137869:+                            | 0.268196079                      | 0.023103394                             |
| ENOX1;A5:chr13:44058288-44241578:44058288-44241604:-                             | 0.332356669                      | 0.025144761                             |
| CLIP4;A5:chr2:29338531-29344240:29338527-29344240:+                              | -0.310201358                     | 0.026387678                             |
| ZNF503-AS2;A5:chr10:77163815-77167013:77163704-77167013:+                        | -0.698523007                     | 0.026992286                             |
| TNFAIP3;A5:chr6:138188679-138192350:138188655-138192350:+                        | -0.402139376                     | 0.027460744                             |
| KRIT1;A5:chr7:91874485-91874741:91874485-91875104:-                              | -0.134815611                     | 0.027460744                             |
| ZNF321P:ZNF816:ZNF816-ZNF321P;A5:chr19:53459357-53465970:53459357-53465980:-     | -0.110963081                     | 0.027460744                             |
| MZF1;A5:chr19:59082796-59084422:59082796-59084740:-                              | -0.100589851                     | 0.027460744                             |
| CDK11A:CDK11B;A5:chr1:1577362-1577708:1577362-1577747:-                          | 0.117515836                      | 0.027460744                             |
| TMEM218;A5:chr11:124972705-124981435:124972705-124981481:-                       | 0.124412112                      | 0.027460744                             |
| COPS7A;A5:chr12:6833416-6833780:6833345-6833780:+                                | 0.209483578                      | 0.027460744                             |
| LOC101927027;A5:chr2:179291388-179295497:179291232-179295497:+                   | 0.22439127                       | 0.027460744                             |
| C17orf62;A5:chr17:80407356-80408356:80407356-80408409:-                          | 0.817038309                      | 0.027460744                             |
| LAMA4;A5:chr6:112508803-112510312:112508803-112510333:-                          | -0.132122351                     | 0.028185802                             |
| SMARCA2;A5:chr9:2158978-2159814:2158553-2159814:+                                | -0.977589515                     | 0.032509445                             |
| THTPA;A5:chr14:24026513-24027904:24026243-24027904:+                             | -0.306690287                     | 0.032509445                             |
| WDR26;A5:chr1:224612356-224619179:224612356-224619227:-                          | -0.131418556                     | 0.032509445                             |
| YAP1;A5:chr11:102076817-102094353:102076805-102094353:+                          | -0.127167737                     | 0.032509445                             |
| TYW3;A5:chr1:75199215-75202226:75199102-75202226:+                               | 0.168190546                      | 0.032509445                             |
| PRRT2;A5:chr16:29823672-29824311:29823644-29824311:+                             | 0.483052392                      | 0.032509445                             |
| BOC;A5:chr3:112935125-112968569:112935121-112968569:+                            | -0.160670821                     | 0.033222319                             |

**Supplementary Table 6.** A list of significant isoform switches (p-value<0.05 & absolute relative expression median delta>0.1) of event type Alternative 5' Splice Sites (A5) found in ESRP1-low versus ESRP-high cell lines using two-sided Wilcoxon test - Continued

| Event name                                                           | Relative expression median delta | Wilcoxon p-value of relative expression |
|----------------------------------------------------------------------|----------------------------------|-----------------------------------------|
| EMR1;A5:chr19:6928321-6934998:6928222-6934998:+                      | 0.161231323                      | 0.036713856                             |
| ARF1;A5:chr1:228271075-228284779:228271053-228284779:+               | -0.507896601                     | 0.038333139                             |
| PTGR2;A5:chr14:74318823-74325519:74318707-74325519:+                 | -0.275398218                     | 0.038333139                             |
| PTGES2;A5:chr9:130887720-130889718:130887720-130890334:-             | -0.263304757                     | 0.038333139                             |
| SLC29A1;A5:chr6:44191692-44193798:44191378-44193798:+                | -0.230354182                     | 0.038333139                             |
| NUDT4;NUDT4P1:NUDT4P2;A5:chr12:93772566-93788385:93772469-93788385:+ | -0.223724084                     | 0.038333139                             |
| PPP1R7;A5:chr2:242089962-242092891:242089123-242092891:+             | -0.139075726                     | 0.038333139                             |
| STRADA;A5:chr17:61781407-61781701:61781407-61781792:-                | 0.140378327                      | 0.038333139                             |
| EXOC1;A5:chr4:56720119-56724480:56719963-56724480:+                  | 0.181009113                      | 0.038333139                             |
| TOMM5;A5:chr9:37588929-37592250:37588929-37592307:-                  | 0.192195424                      | 0.038333139                             |
| GHRLOS;A5:chr3:10323979-10325205:10323918-10325205:+                 | 0.245068576                      | 0.038333139                             |
| CCNO;A5:chr5:54528374-54528595:54528374-54528971:-                   | 0.300009952                      | 0.038333139                             |
| TMEM139;A5:chr7:142982091-142983517:142982067-142983517:+            | 0.590529157                      | 0.038333139                             |
| C5orf38;A5:chr5:2753484-2755143:2753469-2755143:+                    | -0.174400923                     | 0.038765574                             |
| FMO5;A5:chr1:146696658-146696869:146696658-146696879:-               | 0.155500273                      | 0.040242785                             |
| NETO2;A5:chr16:47156695-47156779:47156695-47156800:-                 | -0.25171177                      | 0.044423185                             |
| STK31;A5:chr7:23750389-23751718:23749954-23751718:+                  | 0.19418768                       | 0.044538616                             |
| CNIH2;A5:chr11:66046008-66049730:66046004-66049730:+                 | -0.481095545                     | 0.045020881                             |
| TTC23;A5:chr15:99785715-99789376:99785715-99789622:-                 | -0.225615301                     | 0.045020881                             |
| LSS;A5:chr21:47641889-47642544:47641889-47642577:-                   | -0.125995186                     | 0.045020881                             |
| CSRNP2;A5:chr12:51470430-51477012:51470430-51477122:-                | -0.10691664                      | 0.045020881                             |
| FBXL6;A5:chr8:145580781-145581099:145580781-145581117:-              | 0.125505007                      | 0.045020881                             |
| DCAF11;A5:chr14:24584958-24586181:24584935-24586181:+                | 0.199938771                      | 0.045020881                             |
| IFIT1;A5:chr10:91153098-91162038:91152960-91162038:+                 | 0.273950487                      | 0.045020881                             |
| BUB1B;PAK6;A5:chr15:40532296-40532800:40532003-40532800:+            | -0.685708153                     | 0.046539581                             |
| LINC01518;A5:chr10:43181464-43186983:43181464-43186987:-             | -0.503302014                     | 0.049534613                             |

**Supplementary Table 7.** A list of significant isoform switches (p-value<0.05 & absolute Relative expression median delta>0.1) of event type Alternative First Exon (AF) found in ESRP1-low versus ESRP-high cell lines using two-sided Wilcoxon test

| Event name                                                                                                                               | Relative expression median delta | Wilcoxon p-value of relative expression |
|------------------------------------------------------------------------------------------------------------------------------------------|----------------------------------|-----------------------------------------|
| SH3YL1;AF:chr2:253115-260085:261130:253115-263984:264097:-                                                                               | -0.896020252                     | 0.000308535                             |
| FAM65A;AF:chr16:67562720:67562817-67572327:67571365:67571500-67572327:+                                                                  | -0.458046609                     | 0.000398294                             |
| CCDC120;AF:chrX:48910961:48911406-48919490:48916497:48916626-48919490:+                                                                  | -0.549498905                     | 0.000512005                             |
| SH3BP2;AF:chr4:2813946:2814204-2822341:2819912:2820117-2822341:+                                                                         | -0.281708588                     | 0.000512005                             |
| GPR56;AF:chr16:57653910:57654048-57675503:57662138:57662714-57675503:+                                                                   | 0.609431035                      | 0.000655415                             |
| RABGAP1;AF:chr1:174843524:174843644-174846530:17484656:174844851-174846530:+                                                             | -0.605322798                     | 0.000835477                             |
| RTKN;AF:chr2:74659793-74667480:74667710:74659793-74668833:74669060:-                                                                     | -0.518397176                     | 0.000835477                             |
| C1orf106;AF:chr1:200860627:200860829-200867435:200863949:200864215-200867435:+                                                           | -0.384152666                     | 0.001066553                             |
| CCDC120;AF:chrX:48910961:48911406-48919490:48916497:48916590-48919490:+                                                                  | -0.354476569                     | 0.001066553                             |
| GNAI2;AF:chr3:50264120:50264625-50289532:50273589:50273885-50289532:+                                                                    | 0.119563175                      | 0.001066553                             |
| SMAGP;AF:chr12:51663100-51663843:51663994:51663100-51664040:51664202:-                                                                   | 0.15306024                       | 0.001066553                             |
| FHL1;AF:chrX:135228861:135229171-135252066:135229559:135229787-135252066:+                                                               | 0.161945249                      | 0.001296896                             |
| SERINC2;AF:chr1:31883021:31883282-31896540:31886660:31886911-31896540:+                                                                  | -0.365170376                     | 0.001340641                             |
| RNF24;AF:chr20:3944671-3995792:3996054:3944671-3996084:3996216:-                                                                         | -0.25332296                      | 0.001340641                             |
| EHF;AF:chr11:34642588:34642775-34664175:34654011:34654199-34664175:+                                                                     | 0.43814495                       | 0.001687636                             |
| SLC44A2;AF:chr19:10713121:10713237-10736929:10736171:10736346-10736929:+                                                                 | -0.794039759                     | 0.002115607                             |
| FAM110A;AF:chr20:814340:814594-825351:821918:821959-825351:+                                                                             | -0.610479279                     | 0.002115607                             |
| DEPDC5;AF:chr22:32149937:32149982-32150848:32150009:32150150-32150848:+                                                                  | -0.295117132                     | 0.002115607                             |
| DFNA5;AF:chr7:24789412-24797015:24797083:24789412-24797326:24797639:-                                                                    | -0.265706268                     | 0.002345787                             |
| GPR56;AF:chr16:57653605:57653793-57684165:57662138:57662714-57684165:+                                                                   | 0.905436752                      | 0.002506463                             |
| SH3YL1;AF:chr2:262786-264703:264743:262786-264782:264866:-                                                                               | -0.191790304                     | 0.002641098                             |
| MID1;AF:chrX:10535643-10645505:10645779:10535643-10851673:10851809:-                                                                     | -0.186896902                     | 0.002641098                             |
| PRKACB;AF:chr1:84609931:84610231-84644860:84629867:84630105-84644860:+                                                                   | 0.78523415                       | 0.002843317                             |
| FHL1;AF:chrX:135228861:135229171-135252066:135230737:135230896-135252066:+                                                               | 0.20897045                       | 0.002985471                             |
| HEPH;AF:chrX:65382391:65382718-65390400:65384072:65384312-65390400:+                                                                     | 0.607477825                      | 0.003866534                             |
| FHL1;AF:chrX:135229559:135229787-135252066:135230737:135230896-135252066:+                                                               | -0.440536138                     | 0.003892417                             |
| PIGO;AF:chr9:35095563-35096152:35096546:35095563-35096558:35096598:-                                                                     | 0.234931007                      | 0.005012287                             |
| BRSK2;AF:chr11:1431673:1432136-1457270:1432382:1432863-1457270:+                                                                         | 0.600472545                      | 0.005012287                             |
| ZNF32;AF:chr10:44141650-44144033:44144152:44141650-44144250:44144326:-                                                                   | -0.137681371                     | 0.005362948                             |
| ARHGAP8;AF:chrX:PRR5-PRR5-ARHGAP8;AF:chr22:45064427:45064685-45098372:45072688:45073120-45098372:+                                       | -0.928967723                     | 0.006154624                             |
| MARK2;AF:chr11:63606400:63607032-63662631:63655987:63656436-63662631:+                                                                   | -0.374424963                     | 0.006154624                             |
| SPECC1;AF:chr17:19912649:19912737-19999944:19999335:19999364-19999944:+                                                                  | -0.30712971                      | 0.006154624                             |
| TMEM79;AF:chr1:156252704:156252856-156254975:156254070:156254197-156254975:+                                                             | -0.289785251                     | 0.006154624                             |
| PREPL;AF:chr2:44573529-44586636:44587813:44573529-44586633:44589001:-                                                                    | 0.272821469                      | 0.006154624                             |
| CRIP2;AF:chr14:105939275:105939381-105944603:105943583:105943938-105944603:+                                                             | 0.490548333                      | 0.006154624                             |
| SCO2;AF:chr22:50962853-50964430:50964574:50962853-50964675:50964868:-                                                                    | 0.848270501                      | 0.006154624                             |
| SLC44A3;AF:chr1:95285898:95286034-95290049:95286100:95286279-95290049:+                                                                  | -0.557443519                     | 0.006378219                             |
| GPR56;AF:chr16:57662138:57662740-57675503:57673207:57673582-57675503:+                                                                   | -0.246845578                     | 0.006378219                             |
| SLC43A3;AF:chr11:57194125-57194359:57194560:57194125-57195016:57195053:-                                                                 | -0.332401041                     | 0.006605619                             |
| HIC1;AF:chr17:1958393:1958532-1959965:1959604:1959604-1959965:+                                                                          | -0.549430334                     | 0.006649756                             |
| TMEM254;AF:chr10:81838402:81838542-81841597:81838779:81838940-81841597:+                                                                 | -0.614331312                     | 0.007526315                             |
| NFIX;AF:chr19:13106584:13106678-13135835:13134785:13134848-13135835:+                                                                    | -0.211321512                     | 0.007526315                             |
| BZRAP1-AS1;AF:chr17:56406966:56407025-56414809:56414563:56414671-56414809:+                                                              | 0.336650956                      | 0.007526315                             |
| SLC16A3;AF:chr17:80186282:80186405-80193859:80186887:80186982-80193859:+                                                                 | 0.653972864                      | 0.007526315                             |
| BDNF;AF:chr11:27680132-27720929:27721214:27680132-27722223:27722447:-                                                                    | 0.251931046                      | 0.008730257                             |
| RIMKB;AF:chr12:8834273-8834414-8866407:8850496:8850893-8866407:+                                                                         | 0.252801776                      | 0.009023439                             |
| GSN;AF:chr9:124048359:124048463-124064241:124048858:124049039-124064241:+                                                                | -0.600987252                     | 0.009166074                             |
| TJP3;AF:chr19:3708335:3708559-3728422:3721697:3721908-3728422:+                                                                          | -0.24902283                      | 0.009166074                             |
| SLC35B2;AF:chr6:44224615-44224919:44225089:44224615-44225137:44225308:-                                                                  | -0.132821715                     | 0.009166074                             |
| MDK;AF:chr11:46402334:46402733-46403607:46403205:46403308-46403607:+                                                                     | -0.104072234                     | 0.009166074                             |
| SERPINB6;AF:chr6:2959576-2962128:2962404:2959576-2971725:2972399:-                                                                       | 0.610338801                      | 0.009166074                             |
| RASGRP2;AF:chr11:64510409-64511475:64511630:64510409-64512214:64512329:-                                                                 | -0.34614749                      | 0.009207901                             |
| LYNX1;AF:chr8:143857537-143858330:143858437:143857537-143858522:143858744:-                                                              | 0.517820462                      | 0.009236735                             |
| CLDN2;AF:chrX:106143394:106143734-106171281:106163606:106163781-106171281:+                                                              | -0.388459152                     | 0.010024846                             |
| FHL1;AF:chrX:135230737:135230896-135252066:135251796:135251892-135252066:+                                                               | 0.311269856                      | 0.010562873                             |
| COLCA2;AF:chr11:111169271:111169313-111171252:111169565:111169783-111171252:+                                                            | 0.284548914                      | 0.010803685                             |
| BZRAP1-AS1;AF:chr17:56406299:56406435-56414809:56406966:56407025-56414809:+                                                              | -0.472807771                     | 0.011117561                             |
| NUDT4;AF:chr10:103588956-103599510:103599611:103588956-103603253:103603677:-                                                             | -0.355993883                     | 0.011117561                             |
| KCNIP2;AF:chr10:103588956-103599510:103599611:103588956-103603253:103603677:-                                                            | 0.24793713                       | 0.011117561                             |
| PTGES2;AF:chr9:130887720-130890334:130890467:130887720-130890527:130890741:-                                                             | 0.296540074                      | 0.011117561                             |
| BANP;AF:chr16:87993477:87993599-88008654:88003624:88003776-88008654:+                                                                    | 0.751794208                      | 0.011117561                             |
| SEPT4;AF:chr17:56604339-56605187:56605408:56604339-56609322:56609445:-                                                                   | 0.255390657                      | 0.01169835                              |
| BDNF;AF:chr11:27680132-27741058:27741294:27680132-27741976:27742326:-                                                                    | -0.273297594                     | 0.01144592                              |
| BDNF;AF:chr11:27680132-27741058:27741294:27680132-27742191:27742326:-                                                                    | 0.27457155                       | 0.01144592                              |
| UGT1A1;AF:UGT1A10:UGT1A3:UGT1A4:UGT1A5:UGT1A6:UGT1A7:UGT1A8:UGT1A9;AF:chr2:234590584:234591438-234675680:234637773:234638639-234675680:+ | -0.919872275                     | 0.012334708                             |
| SORBS2;AF:chr4:186696520-186732092:186732258:186696520-186877350:186877870:-                                                             | 0.638296462                      | 0.012738072                             |
| CLDN2;AF:chrX:106143394:106143734-106171281:106161590:106161699-106171281:+                                                              | -0.381593477                     | 0.012857794                             |
| GPR56;AF:chr16:57662138:57662714-57675503:57673207:57673582-57675503:+                                                                   | -0.844859469                     | 0.013429696                             |
| RALGDS;AF:chr9:135987539-135996359:135996637:135987539-136006339:136006544:-                                                             | -0.149210912                     | 0.013429696                             |
| SYTL2;AF:chr11:85459466-85468668:85469112:85459466-85521997:85522202:-                                                                   | 0.67595938                       | 0.013429696                             |
| GPR56;AF:chr16:57653605:57653793-57675503:57662138:57662714-57675503:+                                                                   | 0.999028223                      | 0.013429696                             |
| FAM110A;AF:chr20:814340:814594-825351:816711:816757-825351:+                                                                             | -0.31462473                      | 0.0147378                               |
| BDNF;AF:chr11:27680132-27722528:27722600:27680132-27741976:27742326:-                                                                    | -0.16514322                      | 0.014886724                             |
| KLRC4;AF:KLRC4-KLRC1;KLRC1;AF:chr12:10561609-10561988:10562356:10561609-10562698:10562745:-                                              | -0.746354252                     | 0.015158439                             |
| NELL2;AF:chr12:45269683-45270390:45270633:45269683-45307582:45307711:-                                                                   | 0.255940871                      | 0.015806775                             |
| NR5A2;AF:chr1:199996730:199997039-200012902:200011953:200012093-200012902:+                                                              | 0.364784982                      | 0.016078346                             |
| DLK2;AF:chr6:43422618-43423133:43423362:43422618-43423275:43424370:-                                                                     | -0.712678173                     | 0.016156931                             |
| TMEM254;AF:chr10:81838402:81838542-81841597:81839001:81839063-81841597:+                                                                 | -0.456257267                     | 0.016156931                             |
| RASSF7;AF:chr11:560971:561033-561762:561450:561477-561762:+                                                                              | -0.143856789                     | 0.016156931                             |
| ACSL5;AF:chr10:114133916:114134027-114154676:114133916:114136206-114154676:+                                                             | 0.178062352                      | 0.016156931                             |
| CORO2B;AF:chr15:68908879:68908953-68937499:68924327:68924680-68937499:+                                                                  | -0.344965739                     | 0.016309172                             |
| SCOC;AF:chr4:141264615:141264862-141300275:141294664:141294871-141300275:+                                                               | 0.369020644                      | 0.016377308                             |
| ZNF503-AS2;AF:chr10:77163514:77163815-77167013:77163923:77164042-77167013:+                                                              | -0.657546412                     | 0.016578175                             |

**Supplementary Table 7.** A list of significant isoform switches (p-value<0.05 & absolute Relative expression median delta>0.1) of event type Alternative First Exon (AF) found in ESRP1-low versus ESRP-high cell lines using two-sided Wilcoxon test **-Continued**

| Event name                                                                                                                                                                                                                                                              | Relative expression median delta | Wilcoxon p-value of relative expression |
|-------------------------------------------------------------------------------------------------------------------------------------------------------------------------------------------------------------------------------------------------------------------------|----------------------------------|-----------------------------------------|
| GRHL3;AF:chr1:24646056:24646237-24657916:24649530:24649607-24657916:+                                                                                                                                                                                                   | -0.389732328                     | 0.016638679                             |
| FHL1;AF:chrX:135278913:135279022-135288566:135279055:135279293-135288566:+                                                                                                                                                                                              | -0.140993708                     | 0.016762336                             |
| RIMK1B;AF:chr12:8834273:8834414-8866407:8852381:8853210-8866407:+                                                                                                                                                                                                       | 0.116105519                      | 0.016970294                             |
| C2orf54;AF:chr2:241831180-241831290:241831455:241831180-241834901:241835573:-                                                                                                                                                                                           | -0.976001453                     | 0.018554892                             |
| C2orf54;AF:chr2:241831180-241831347:241831455:241831180-241834901:241835573:-                                                                                                                                                                                           | -0.903182684                     | 0.018554892                             |
| BDNF;AF:chr11:27680132-27722518:27722600:27680132-27741058:27741294:-                                                                                                                                                                                                   | -0.258460541                     | 0.019208251                             |
| BDNF;AF:chr11:27680132-27722518:27722600:27680132-27742191:27742326:-                                                                                                                                                                                                   | -0.215343049                     | 0.019208251                             |
| BDNF;AF:chr11:27680132-27722518:27722600:27680132-27741976:27742326:-                                                                                                                                                                                                   | -0.172068435                     | 0.019208251                             |
| RAD17;AF:chr5:68665124:68665291-68666862:68665639:68665760-68666862:+                                                                                                                                                                                                   | 0.296348804                      | 0.019359467                             |
| RNF14;AF:chr5:141346402:141346469-141350269:141348451:141348732-141350269:+                                                                                                                                                                                             | 0.110762114                      | 0.019359467                             |
| GYLTL1B;AF:chr11:45943172:45943244-45944372:45944227:45944279-45944372:+                                                                                                                                                                                                | 0.203651242                      | 0.019359467                             |
| SLC22A23;AF:chr6:3416089-3445053:3445247:3416089-3456140:3456793:-                                                                                                                                                                                                      | 0.223461213                      | 0.019359467                             |
| PEX11B;AF:chr1:145516165:145516452-145517273:145516560:145516657-145517273:+                                                                                                                                                                                            | 0.253725279                      | 0.019359467                             |
| LTBP4;AF:chr19:41099072-41099087-41105103:41103141:41103286-41105103:+                                                                                                                                                                                                  | 0.265207871                      | 0.019359467                             |
| CASP8;AF:chr2:202122754:202123105-202131184:202125223:202125336-202131184:+                                                                                                                                                                                             | 0.332153401                      | 0.019359467                             |
| FOXP1;AF:chr3:71630848-71632722:71632904:71630848-71633061:71633140:-                                                                                                                                                                                                   | 0.345230423                      | 0.019359467                             |
| SESN1;AF:chr6:109323546-109330562:109330758:109323546-109414998:109415708:-                                                                                                                                                                                             | 0.376628405                      | 0.019359467                             |
| CTAGE5;AF:chr14:39734476:39734625-39746138:39736328:39736726-39746138:+                                                                                                                                                                                                 | 0.397045717                      | 0.019359467                             |
| ZFAT;AF:chr8:135687131-135708674:135708801:135687131-135725088:135725292:-                                                                                                                                                                                              | 0.488938709                      | 0.019359467                             |
| DSE;AF:chr6:116601283:116601423-116720361:116692110:116692284-116720361:-                                                                                                                                                                                               | 0.58885218                       | 0.019359467                             |
| PRKACB;AF:chr1:84543658:84544054-84644860:84609931:84610231-84644860:+                                                                                                                                                                                                  | -0.600626775                     | 0.020736608                             |
| PHLBD2;PCXD2;AF:chr3:111578027:111578423-111602911:111578568:111578725-111602911:+                                                                                                                                                                                      | -0.313220034                     | 0.020776366                             |
| CHN2;AF:chr7:29234121:29234606-29394241:29237357:29237599-29394241:+                                                                                                                                                                                                    | -0.409806492                     | 0.021966357                             |
| PDE4B;AF:chr1:66258193:66258313-66378928:66258856:66258931-66378928:+                                                                                                                                                                                                   | -0.240474471                     | 0.022740296                             |
| MINOS1;MINOS1-NB1;NB1;AF:chr1:19970208:19970448-19981505:19971866:19972024-19981505:+                                                                                                                                                                                   | -0.655773667                     | 0.023103394                             |
| BBC3;AF:chr19:47731703-47734186:4773451:47731703-47735772:47736023:-                                                                                                                                                                                                    | -0.533904773                     | 0.023103394                             |
| SH3YL1;AF:chr2:253115-260085:261130:253115-264084:264392:-                                                                                                                                                                                                              | -0.399163108                     | 0.023103394                             |
| ICA1;AF:chr7:8275635-8301724:8301911:8275635-8302070:8302242:-                                                                                                                                                                                                          | -0.378123012                     | 0.023103394                             |
| KIAA0586;AF:chr14:58894103:58894355-58896081:58894710:58895181-58896081:+                                                                                                                                                                                               | -0.244690788                     | 0.023103394                             |
| ARHGAP8;PRR5;PRR5-ARHGAP8;AF:chr22:45064427:45064685-45110471:45072688:45073120-45110471:+                                                                                                                                                                              | -0.127410072                     | 0.023103394                             |
| KATNAL1;AF:chr13:30857928-30881077:30881191:30857928-30881468:30881624:-                                                                                                                                                                                                | 0.143237194                      | 0.023103394                             |
| MINOS1;MINOS1-NB1;NB1;AF:chr1:19923471:19923603-19981505:19970208:19970448-19981505:+                                                                                                                                                                                   | 0.26933054                       | 0.023103394                             |
| SRC;AF:chr20:35973088:35973290-35993607:35974531:35974658-35993607:+                                                                                                                                                                                                    | 0.389429481                      | 0.023103394                             |
| SLC12A6;AF:chr15:34567590-34610762:34611021:34567590-34628611:34629045:-                                                                                                                                                                                                | 0.467063849                      | 0.023103394                             |
| WNT2B;AF:chr1:113009163:113010213-113057496:113051370:113052066-113057496:+                                                                                                                                                                                             | 0.613652655                      | 0.023103394                             |
| SH3YL1;AF:chr2:253115-264084:264392:253115-264782:264866:-                                                                                                                                                                                                              | 0.757449007                      | 0.023103394                             |
| ADAMTSL2;AF:chr9:136397286:136397692-136401685:136399975:136400039-136401685:+                                                                                                                                                                                          | -0.231241749                     | 0.023342202                             |
| NELL2;AF:chr12:45269683-45270077:45270247:45269683-45270390:45270633:-                                                                                                                                                                                                  | -0.282840411                     | 0.02396768                              |
| SLC43A3;AF:chr11:57194125-57194539:57194621:57194125-57195016:57195053:-                                                                                                                                                                                                | -0.211100016                     | 0.024588566                             |
| BDNF;AF:chr11:27680132-27720929:27721214:27680132-27721711:27722035:-                                                                                                                                                                                                   | 0.515508212                      | 0.024588566                             |
| CORO2B;AF:chr15:68871308:68871616-68937499:68924327:68924680-68937499:+                                                                                                                                                                                                 | -0.469463776                     | 0.024974679                             |
| UGT1A1;UGT1A10;UGT1A3;UGT1A4;UGT1A5;UGT1A6;UGT1A7;UGT1A8;UGT1A9;AF:chr2:234590584:234591438-234675680:234668919:234669797-234675680:+                                                                                                                                   | -0.944307087                     | 0.026387678                             |
| ZNF790;AF:chr19:37316594-37328574:37328929:37316594-37329239:37329286:-                                                                                                                                                                                                 | 0.454557216                      | 0.026430974                             |
| COLCA2;AF:chr11:111169565:111169783-111171252:111169976:111170449-111171252:+                                                                                                                                                                                           | -0.4077221568                    | 0.026856696                             |
| FBLN2;AF:chr3:13590625:13590708-13611815:13610240:13610580-13611815:+                                                                                                                                                                                                   | -0.159617545                     | 0.027030077                             |
| HRH1;AF:chr3:11196214:11196240-11300689:11267669:11267745-11300689:+                                                                                                                                                                                                    | -0.319507233                     | 0.027460744                             |
| CREB3L4;AF:chr1:153940315:153940660-153940998:153940675:153940786-153940998:+                                                                                                                                                                                           | -0.148660797                     | 0.027460744                             |
| RNF14;AF:chr5:141346402:141346469-141350269:141348712:141348799-141350269:+                                                                                                                                                                                             | 0.104338161                      | 0.027460744                             |
| BIVM;BIVM-ERCC5;ERCC5;AF:chr13:103451399:103451871-103468778:103459496:103460095-103468778:+                                                                                                                                                                            | 0.134671662                      | 0.027460744                             |
| FGD5-AS1;AF:chr3:14987661-14989246:14989400:14987661-14989520:14989948:-                                                                                                                                                                                                | 0.150630649                      | 0.027460744                             |
| CTAGE5;AF:chr14:39735502:39735731-39746138:39736328:39736726-39746138:+                                                                                                                                                                                                 | 0.168056642                      | 0.027460744                             |
| SLC20A2;AF:chr8:42330172-42335849:42338978:42330172-42339696:423397356:-                                                                                                                                                                                                | 0.401965269                      | 0.027460744                             |
| TMEM51;AF:chr1:15479028:15479280-15541391:15480229:15480450-15541391:+                                                                                                                                                                                                  | 0.451970344                      | 0.027460744                             |
| SERPINB6;AF:chr6:2959576-2962128:2962404:2959576-2971482:2972399:-                                                                                                                                                                                                      | 0.517943019                      | 0.027460744                             |
| PSCA;AF:chr8:143751726:143751986-143762745:143761874:143761981-143762745:+                                                                                                                                                                                              | -0.253777323                     | 0.029272509                             |
| GJB1;AF:chrX:70435062:70435140-70443542:70443056:70443185-70443542:+                                                                                                                                                                                                    | 0.409053445                      | 0.02991299                              |
| LYNX1;AF:chr8:143857537-143858330:143858437:143857537-143859175:143859640:-                                                                                                                                                                                             | 0.532580714                      | 0.030059568                             |
| BDNF;AF:chr11:27680132-27722223:27722447:27680132-27741058:27741294:-                                                                                                                                                                                                   | -0.47503176                      | 0.031228617                             |
| BDNF;AF:chr11:27680132-27722844:27723180:27680132-27742959:27743605:-                                                                                                                                                                                                   | -0.131250184                     | 0.031228617                             |
| GFOD1;AF:chr6:13365894-13408142:13408369:13365894-13486243:13486415:-                                                                                                                                                                                                   | -0.123788491                     | 0.031557786                             |
| LOC100288798;AF:chr12:46777459:46777478-46781530:46777890:46777944-46781530:+                                                                                                                                                                                           | 0.214691858                      | 0.031557786                             |
| RG52;AF:chr8:54764368:54764624-54852136:54793432:54793644-54852136:+                                                                                                                                                                                                    | 0.418864015                      | 0.031794861                             |
| RCAN1;AF:chr21:35896008-35897386:35897765:35896008-35986577:35986745:-                                                                                                                                                                                                  | -0.998444471                     | 0.032509445                             |
| IFIT3;AF:chr10:91087576:91087835-91098418:91092236:91092384-91098418:+                                                                                                                                                                                                  | -0.493733024                     | 0.032509445                             |
| PCDHGA1;PCDHGA10;PCDHGA11;PCDHGA12;PCDHGA2;PCDHGA3;PCDHGA4;PCDHGA5;PCDHGA6;PCDHGA7;PCDHGA8;PCDHGA9;PCDHGB1;PCDHGB2;PCDHGB3;PCDHGB4;PCDHGB5;PCDHGB6;PCDHGB7;PCDHGB8;PCDHGB9;PCDHGC;PCDHGC4;PCDHGC5;AF:chr5:140723601:140726024-140874374:140787770:140790187-140874374:+ | -0.412373007                     | 0.032509445                             |
| PRKAR1A;AF:chr17:66507921:66508283-66511535:66508520:66508720-66511535:+                                                                                                                                                                                                | -0.318872091                     | 0.032509445                             |
| CSPG5;AF:chr3:47619418-47620087:47620359:47619418-47621380:47621730:-                                                                                                                                                                                                   | -0.271682332                     | 0.032509445                             |
| DNMT3B;AF:chr20:31350191:31350505-31368124:31367658:31367951-31368124:+                                                                                                                                                                                                 | -0.233748821                     | 0.032509445                             |
| YY1AP1;AF:chr1:155657992-155658450:155658568:155657992-155658721:155658823:-                                                                                                                                                                                            | -0.171680719                     | 0.032509445                             |
| RALGDS;AF:chr9:135987539-136004526:136004788:135987539-136006339:136006544:-                                                                                                                                                                                            | -0.152108711                     | 0.032509445                             |
| ZEB1;AF:chr3:31608101:31608221-31749966:31610064:31610461-31749966:+                                                                                                                                                                                                    | -0.141172149                     | 0.032509445                             |
| NSUN4;AF:chr1:46805849:46806591-46810473:46806850:46807537-46810473:+                                                                                                                                                                                                   | 0.112123701                      | 0.032509445                             |
| BUB1B;PAK6;AF:chr15:40509629:40509868-40532800:40531292:40532003-40532800:+                                                                                                                                                                                             | -0.942495315                     | 0.032524181                             |
| GPR56;AF:chr16:57653605:57653793-57684165:57673207:57673582-57684165:+                                                                                                                                                                                                  | 0.5952643                        | 0.032524181                             |
| RAI2;AF:chrX:17820154-17878629:17878947:17878947:17879218:17879457:-                                                                                                                                                                                                    | -0.352561616                     | 0.033006258                             |
| FAM65C;AF:chr20:49247393-49253118:49253455:49247393-49307663:49308067:-                                                                                                                                                                                                 | 0.437018019                      | 0.033222319                             |
| SNCA;AF:chr4:90756843-90758113:90758350:90756843-90759403:90759447:-                                                                                                                                                                                                    | -0.530915156                     | 0.033894854                             |
| SNCA;AF:chr4:90756843-90757894:90758127:90758127-90759403:90759447:-                                                                                                                                                                                                    | -0.360056932                     | 0.033894854                             |
| STRA6;AF:chr15:74494623-74495344:74495556:74494623-74501141:74501371:-                                                                                                                                                                                                  | 0.272769977                      | 0.035014981                             |
| BDNF;AF:chr11:27680132-27722223:27722447:27680132-27741976:27742326:-                                                                                                                                                                                                   | -0.317780273                     | 0.035090018                             |
| MEST;AF:chr7:130131170:130131327-130135209:130131899:130132180-130135209:+                                                                                                                                                                                              | 0.365632722                      | 0.037573552                             |

**Supplementary Table 7.** A list of significant isoform switches (p-value<0.05 & absolute Relative expression median delta>0.1) of event type Alternative First Exon (AF) found in ESRP1-low versus ESRP-high cell lines using two-sided Wilcoxon test -Continued

| Event name                                                                                                                                                                                                                                               | Relative expression median delta | Wilcoxon p-value of relative expression |
|----------------------------------------------------------------------------------------------------------------------------------------------------------------------------------------------------------------------------------------------------------|----------------------------------|-----------------------------------------|
| RCAN1;AF:chr21:35896008-35897386:35897765:35896008-35986086:35986142:-                                                                                                                                                                                   | -0.886892765                     | 0.038333139                             |
| CLIP4;AF:chr2:29320542:29320813-29344240:29338292:29338527-29344240:+                                                                                                                                                                                    | -0.765451862                     | 0.038333139                             |
| GCNT1;AF:chr9:79056582:79057231-79115832:79093257:79093446-79115832:+                                                                                                                                                                                    | -0.362120278                     | 0.038333139                             |
| KLHL2;AF:chr4:166128770:166129054-166141086:166131171:166131332-166141086:+                                                                                                                                                                              | -0.274177047                     | 0.038333139                             |
| CYTH1;AF:chr17:76705814-76713011:76713114:76705814-76778284:76778424:-                                                                                                                                                                                   | 0.101278469                      | 0.038333139                             |
| SHISA5;AF:chr3:48538726-48541452:48541682:48538726-48541856:48542247:-                                                                                                                                                                                   | 0.109669608                      | 0.038333139                             |
| PNPLA4;AF:chrX:7894173-7895327:7895475:7894173-7895727:7895780:-                                                                                                                                                                                         | 0.135431486                      | 0.038333139                             |
| NFATC2;AF:chr20:50140649-50158909:50159258:50140649-50179099:50179370:-                                                                                                                                                                                  | 0.174207534                      | 0.038333139                             |
| PPP1R13L;AF:chr19:45901597-45908257:45908312:45901597-45909550:45909607:-                                                                                                                                                                                | 0.223093688                      | 0.038333139                             |
| MID1;AF:chrX:10535643-10544824:10544957:10535643-10645505:10645779:-                                                                                                                                                                                     | 0.297153548                      | 0.038333139                             |
| PLA2G6;AF:chr22:38565478-38577671:38577761:38565478-38577791:38577836:-                                                                                                                                                                                  | 0.303885563                      | 0.038333139                             |
| PRKAR1A;AF:chr17:66409764:66409936-66511535:66507921:66508283-66511535:+                                                                                                                                                                                 | 0.305163481                      | 0.038333139                             |
| PRKAG2;AF:chr7:151483627-151511502:151511957:151483627-151573592:151574316:-                                                                                                                                                                             | 0.334230078                      | 0.038333139                             |
| SH3YL1;AF:chr2:253115-263984:264097:253115-264782:264866:-                                                                                                                                                                                               | 0.57574925                       | 0.038333139                             |
| DDR1;AF:chr6:30850390:30850760-30856465:30852315:30852487-30856465:+                                                                                                                                                                                     | 0.639270653                      | 0.038333139                             |
| ACOT7;AF:chr1:6409926-6420630:6420764:6409926-6445554:6445883:-                                                                                                                                                                                          | 0.808560074                      | 0.038333139                             |
| LSP1;AF:chr11:1891482:1891891-1901317:1892099:1892642-1901317:+                                                                                                                                                                                          | 0.543393383                      | 0.038867104                             |
| SYNP02;AF:chr4:119771843:119772095-119944585:119809996:119810296-119944585:+                                                                                                                                                                             | 0.505165194                      | 0.039211045                             |
| BDNF;AF:chr11:27680132-27721729:27722035:27680132-27742959:27743605:-                                                                                                                                                                                    | -0.252352455                     | 0.039351837                             |
| BDNF;AF:chr11:27680132-27720929:27721214:27680132-27741976:27742326:-                                                                                                                                                                                    | -0.226756719                     | 0.039351837                             |
| BDNF;AF:chr11:27680132-27720929:27721214:27680132-27722844:27723180:-                                                                                                                                                                                    | 0.51557884                       | 0.039351837                             |
| SORBS2;AF:chr4:186696520-186732092:186732258:186696520-186732818:186733410:-                                                                                                                                                                             | 0.353011289                      | 0.041540067                             |
| SORBS2;AF:chr4:186696520-186696856:186697066:186696520-186877350:186877870:-                                                                                                                                                                             | 0.570693816                      | 0.041540067                             |
| FGFR1;AF:chr8:38315052-38325190:38325363:38315052-38325499:38326352:-                                                                                                                                                                                    | -0.253521273                     | 0.043311496                             |
| DAPK1;AF:chr9:90112596:90113022-90113885:90113450:90113551-90113885:+                                                                                                                                                                                    | -0.241662467                     | 0.043975196                             |
| BDNF;AF:chr11:27680132-27721729:27722035:27680132-27741976:27742326:-                                                                                                                                                                                    | -0.433429208                     | 0.044045295                             |
| BDNF;AF:chr11:27680132-27722223:27722447:27680132-27741893:27742326:-                                                                                                                                                                                    | -0.219878172                     | 0.044045295                             |
| UGT1A1;UGT1A10;UGT1A3;UGT1A4;UGT1A5;UGT1A6;UGT1A7;UGT1A8;UGT1A9;AF:chr2:234590584:234591438-234675680:234601512:234602511-234675680:+                                                                                                                    | -0.621340891                     | 0.044538616                             |
| MYADM;AF:chr19:54369412:54369671-54373008:54371119:54371202-54373008:+                                                                                                                                                                                   | -0.546254274                     | 0.045020881                             |
| PTCH1;AF:chr9:98268881-98270443:98270831:98268881-98278905:98279247:-                                                                                                                                                                                    | -0.45241174                      | 0.045020881                             |
| DDR1;AF:chr6:30852315:30852487-30856465:30852757:30853008-30856465:+                                                                                                                                                                                     | -0.106491859                     | 0.045020881                             |
| EXD2;AF:chr14:69658194:69658308-69670634:69658483:69658756-69670634:+                                                                                                                                                                                    | -0.10134907                      | 0.045020881                             |
| PACSLN2;AF:chr22:43308163-43355805:43355887:43308163-43411027:43411184:-                                                                                                                                                                                 | 0.102476783                      | 0.045020881                             |
| GNA13;AF:chr17:63049846-63051711:63051892:63049846-63052429:63052920:-                                                                                                                                                                                   | 0.122065789                      | 0.045020881                             |
| AK3;AF:chr9:4722625-4726083:4726227:4722625-4740937:4741309:-                                                                                                                                                                                            | 0.13496397                       | 0.045020881                             |
| AKT1S1;AF:chr19:50376559-50379131:50379506:50376559-50379860:50380644:-                                                                                                                                                                                  | 0.211310288                      | 0.045020881                             |
| ACOT7;AF:chr1:6409926-6420630:6420764:6409926-6453317:6453826:-                                                                                                                                                                                          | 0.284933356                      | 0.045020881                             |
| SERPINB6;AF:chr6:2959576-2970992:2971282:2959576-2971725:2972399:-                                                                                                                                                                                       | 0.317995396                      | 0.045020881                             |
| MYADM;AF:chr19:54371119:54371202-54373008:54371799:54371913-54373008:+                                                                                                                                                                                   | 0.346420387                      | 0.045020881                             |
| SERPINB6;AF:chr6:2959576-2962128:2962404:2959576-2970992:2971282:-                                                                                                                                                                                       | 0.445802915                      | 0.045020881                             |
| PCDHGA1:PCDHGA10:PCDHGA11:PCDHGA12:PCDHGA2:PCDHGA3:PCDHGA4:PCDHGA5:PCDHGA6:PCDHGA7:PCDHGA8:PCDHGA9:PCDHGB1:PCDHGB2:PCDHGB3:PCDHGB4:PCDHGB5:PCDHGB6:PCDHGB7:PCDHGC3:PCDHGC4:PCDHGC5;AF:chr5:140787770:140790187-140874374:140855569:140858113-140874374:+ | 0.477207835                      | 0.045020881                             |
| PCDHGA1:PCDHGA10:PCDHGA11:PCDHGA12:PCDHGA2:PCDHGA3:PCDHGA4:PCDHGA5:PCDHGA6:PCDHGA7:PCDHGA8:PCDHGA9:PCDHGB1:PCDHGB2:PCDHGB3:PCDHGB4:PCDHGB5:PCDHGB6:PCDHGB7:PCDHGC3:PCDHGC4:PCDHGC5;AF:chr5:140753651:140756074-140874374:140855569:140858113-140874374:+ | 0.63349834                       | 0.045020881                             |
| NEBL-AS1;AF:chr10:21462919:21463036-21463411:21463231:21463302-21463411:+                                                                                                                                                                                | 0.434813339                      | 0.045500264                             |
| PHYHIP1;AF:chr10:60936348:60936719-60994064:60937227:60937378-60994064:+                                                                                                                                                                                 | 0.538768464                      | 0.045500264                             |
| PCDHA1:PCDHA10:PCDHA11:PCDHA12:PCDHA13:PCDHA2:PCDHA3:PCDHA4:PCDHA5:PCDHA6:PCDHA7:PCDHA8:PCDHA9:PCDHAC1:PCDHAC2;AF:chr5:140235468:140237232-140358534:140345747:140348916-140358534:+                                                                     | 0.544515119                      | 0.047125304                             |
| MB;AF:chr22:36013312-36013409:36013555:36013312-36019238:36019401:-                                                                                                                                                                                      | 0.510963509                      | 0.047418372                             |
| PCDHA1:PCDHA10:PCDHA11:PCDHA12:PCDHA13:PCDHA2:PCDHA3:PCDHA4:PCDHA5:PCDHA6:PCDHA7:PCDHA8:PCDHA9:PCDHAC1:PCDHAC2;AF:chr5:140174444:140176937-140358534:140306302:140308910-140358534:+                                                                     | 0.514652015                      | 0.047418372                             |
| BDNF;AF:chr11:27680132-27722518:27722600:27680132-27741893:27742326:-                                                                                                                                                                                    | -0.123760122                     | 0.049202789                             |
| CLDN2;AF:chrX:106161590:106161699-106171281:106163606:106163781-106171281:+                                                                                                                                                                              | 0.38247201                       | 0.049534613                             |

**Supplementary Table 8.** A list of significant isoform switches (p-value<0.05 & absolute Relative expression median delta>0.1) of event type Alternative First Exon (AF) found in ESRP1-low versus ESRP-high cell lines using two-sided Wilcoxon test

| Event name                                                                   | Relative expression median delta | Wilcoxon p-value of relative expression |
|------------------------------------------------------------------------------|----------------------------------|-----------------------------------------|
| KRTCAP3;AL:chr2:27666928-27667053:27667164:27666928-27669168:27669348:+      | 0.267379001                      | 0.001339739                             |
| PSG6;AL:chr19:43406234:43406598-43411074:43407768:43407873-43411074:-        | -0.160188803                     | 0.00448325                              |
| ZNF254;AL:chr19:24289445-24290018:24290154:24289445-24309056:24312769:+      | -0.083858871                     | 0.004807913                             |
| C22orf39;AL:chr22:19428410:19429217-19434901:19430673:19431913-19434901:-    | 0.180053447                      | 0.005012287                             |
| FGFR2;AL:chr10:123237844:123239535-123243212:123241367:123241691-123243212:- | -0.038915802                     | 0.006154624                             |
| LOC100506990;AL:chr8:12388540-12406996:12408558:12388540-12423395:12424354:+ | 0.18615473                       | 0.009166074                             |
| THAP7-AS1;AL:chr22:21357118-21357207:21357561:21357118-21362956:21364663:+   | 0.233123817                      | 0.009166074                             |
| BCL7C;AL:chr16:30845362:30846469-30900181:30899116:30899311-30900181:-       | -0.017807045                     | 0.011117561                             |
| CDCA3;AL:chr12:6955889:6956067-6958729:6957972:6958362-6958729:-             | 0.280879297                      | 0.013429696                             |
| NIN;AL:chr14:51192546:51192784-51196241:51193951:51194469-51196241:-         | 0.133252922                      | 0.015018591                             |
| PPCS;AL:chr1:42923021-42925274:42926901:42923021-42938793:42939049:+         | -0.04482526                      | 0.016156931                             |
| FAM86B3P;AL:chr8:8094797-8095832:8096448:8094797-8097149:8097552:+           | 0.311601056                      | 0.016156931                             |
| SVIL-AS1;AL:chr10:29704341-29757849:29758059:29704341-29776084:29776785:+    | -0.803238109                     | 0.020210931                             |
| SEPT6;AL:chrX:118749688:118750705-118763281:118750909:118752749-118763281:-  | 0.595329543                      | 0.021966365                             |
| SVIL-AS1;AL:chr10:29704341-29709394:29711301:29704341-29757849:29758059:+    | 0.99998853                       | 0.022292295                             |
| SVIL-AS1;AL:chr10:29704341-29757849:29758059:29704341-29771762:29774636:+    | -0.412580733                     | 0.023103394                             |
| LOC644919;AL:chr14:41443595-41494725:41494994:41443595-41610037:41610251:+   | 0.193477629                      | 0.027248441                             |
| LIMK2;AL:chr22:31671294-31672775:31673624:31671294-31674283:31676066:+       | -0.12068326                      | 0.027460744                             |
| POM121;AL:chr7:72416247-72416676:72418843:72416247-72418867:72421979:+       | -0.027940942                     | 0.027460744                             |
| SVIL-AS1;AL:chr10:29704341-29709394:29711301:29704341-29771762:29774636:+    | 0.313129715                      | 0.027460744                             |
| BAIAP2;AL:chr17:79082309-79082768:79084312:79082309-79089570:79091232:+      | 0.187314809                      | 0.032509445                             |
| TSFM;AL:chr12:58186856-58189960:58191370:58186856-58196338:58196639:+        | -0.103463851                     | 0.038333139                             |
| CGREF1;AL:chr2:27322221:27322708-27324965:27323462:27324756-27324965:-       | -0.079718459                     | 0.043975196                             |
| FBLN1;AL:chr22:45946495-45953951:45954591:45946495-45960764:45961581:+       | 0.35597011                       | 0.044423185                             |
| NF2;AL:chr22:30077590-30079009:30079904:30077590-30090741:30094589:+         | 0.227039998                      | 0.045020881                             |

**Supplementary Table 9.** A list of significant isoform switches (p-value<0.05 & absolute Relative expression median delta>0.1) of event type Mutually Exclusive Exon (MX) found in ESRP1-low versus ESRP-high cell lines using two-sided Wilcoxon test

| Event name                                                                                                     | Relative expression median delta | Wilcoxon p-value of relative expression |
|----------------------------------------------------------------------------------------------------------------|----------------------------------|-----------------------------------------|
| EXOC7;MX:chr17:74085401-74086410:74086478-74090495:74085401-74087224:74087316-74090495:-                       | 0.778616202                      | 0.000237997                             |
| TCF7L2;MX:chr10:114917828-114918426:114918476-114925314:114917828-114920378:114920450-114925314:+              | -0.308669373                     | 0.000655415                             |
| DNM2;MX:chr19:10906115-10906737:10906875-10909162:10906115-10908056:10908194-10909162:+                        | 0.17723361                       | 0.000655415                             |
| FGFR3;MX:chr4:1803752-1804641:1804791-1806057:1803752-1805419:1805563-1806057:+                                | 0.394181172                      | 0.000835477                             |
| TCF7L2;MX:chr10:114917828-114919679:114919751-114925314:114917828-114920378:114920450-114925314:+              | -0.20099847                      | 0.002115607                             |
| DLG1;MX:chr3:196796131-196802708:196802741-196807922:196796131-196803457:196803556-196807922:-                 | 0.204488848                      | 0.002115607                             |
| CACNA1G;MX:chr17:48696369-48697044:48697187-48701268:48696369-48699021:48699155-48701268:+                     | 0.708014581                      | 0.002736753                             |
| TSPAN4;MX:chr11:842915-847201:847300-862550:842915-850288:850367-862550:+                                      | -0.484202773                     | 0.00406519                              |
| MARK3;MX:chr14:103958371-103964839:103964865-103969219:103958371-103966493:103966537-103969219:+               | -0.416682671                     | 0.00406519                              |
| YAF2;MX:chr12:42555567-42592938:42593037-42631401:42555567-42604350:42604421-42631401:-                        | -0.472389037                     | 0.008123423                             |
| MUC1;MX:chr1:155159850-155159931:155160052-155160484:155159850-155160198:155160334-155160484:-                 | -0.973219917                     | 0.009166074                             |
| CKLF;CKLF-CMTM1:CMTM1;MX:chr16:66586696-66592093:66592251-66599789:66586696-66597025:66597120-66599789:+       | 0.146953056                      | 0.009166074                             |
| IFIT1;MX:chr10:91152474-91152864:91153098-91162038:91152474-91159652:91159760-91162038:+                       | 0.22093819                       | 0.009166074                             |
| FRS2;MX:chr12:69864310-69874079:69874139-69924645:69864310-69885318:69885431-69924645:+                        | 0.342686486                      | 0.009166074                             |
| MBNL1;MX:chr3:152165562-152173331:152173366-152177060:152165562-152174056:152174150-152177060:+                | -0.198642953                     | 0.013429650                             |
| FXD2:FXD6:FXD6-FXD2;MX:chr11:117713496-117714825:117714921-117747307:117713496-117728926:117729001-117747307:- | 0.172762631                      | 0.014305878                             |
| CHFR;MX:chr12:133438220-133438919:133439011-133447310:133438220-133446205:133446420-133447310:-                | -0.214441614                     | 0.019208251                             |
| FGFR2;MX:chr10:123274833-123276833:123276977-123279493:123274833-123278196:123278343-123279493:-               | -0.547726346                     | 0.019359467                             |
| BACE2;MX:chr21:42617990-42622679:42622828-42647298:42617990-42629085:42629253-42647298:+                       | -0.337957668                     | 0.019359467                             |
| AKAP13;MX:chr15:86199018-86201768:86201821-86207794:86199018-86205619:86205684-86207794:+                      | -0.206535754                     | 0.019359467                             |
| FRS2;MX:chr12:69864310-69879982:69880077-69924645:69864310-69885318:69885431-69924645:+                        | 0.106665413                      | 0.019359467                             |
| CACNB1;MX:chr17:37341117-37341384:37341403-37342749:37341117-37342203:37342357-37342749:-                      | 0.142042744                      | 0.019359467                             |
| IFIT1;MX:chr10:91152474-91152864:91153098-91162038:91152474-91159647:91159760-91162038:+                       | 0.177453417                      | 0.019359467                             |
| GSR;MX:chr8:30541716-30546678:30546836-30553897:30541716-30550486:30550572-30553897:-                          | -0.698784316                     | 0.023103394                             |
| C16orf13;MX:chr16:684797-684889:684956-685612:684797-685281:685340-685612:-                                    | -0.422368138                     | 0.023103394                             |
| UBE2C;MX:chr20:44442103-44443023:44443109-44444493:44442103-44444180:44444384-44444493:+                       | -0.203621893                     | 0.023103394                             |
| ZNF778;MX:chr16:89288591-89289565:89289691-89291963:89288591-89291127:89291210-89291963:+                      | 0.166592935                      | 0.023103394                             |
| PCBP4;MX:chr3:51995320-51995957:51996104-52001342:51995320-51996826:51996908-52001342:-                        | 0.134693449                      | 0.027460744                             |
| SORBS2;MX:chr4:186599976-186605908:186606000-186696381:186599976-186611716:186611765-186696381:-               | 0.457346703                      | 0.031450449                             |
| PAX5;MX:chr9:36840633-36846840:36846926-36923352:36840633-36882001:36882102-36923352:-                         | 0.50680871                       | 0.031686389                             |
| GNPDA2;MX:chr4:44719312-44720326:44720427-44728491:44719312-44724101:44724259-44728491:-                       | -0.226871436                     | 0.032509445                             |
| P4HA2;MX:chr5:131531173-131533899:131533964-131534572:131531173-131534014:131534073-131534572:-                | 0.10292619                       | 0.032509445                             |
| DLG1;MX:chr3:196796131-196802708:196802741-196807922:196796131-196803457:196803553-196807922:-                 | 0.124785834                      | 0.032509445                             |
| SORBS1;MX:chr10:97127456-97131083:97131184-97135730:97127456-97131741:97131806-97135730:-                      | 0.387401108                      | 0.032509445                             |
| NR2F1-AS1;MX:chr5:92747215-92768071:92768166-92889467:92747215-92774409:92774447-92889467:-                    | 0.308745741                      | 0.036713856                             |
| GSN;MX:chr9:124043840-124044153:124044231-124064241:124043840-124062343:124062404-124064241:+                  | 0.330419795                      | 0.038333139                             |
| PGAP2;MX:chr11:3829545-3832480:3832654-3845500:3829545-3845113:3845365-3845500:+                               | 0.452259247                      | 0.038333139                             |
| SORBS2;MX:chr4:186556565-186559233:186559316-186567822:186556565-186560031:186560189-186567822:-               | -0.386364049                     | 0.041540067                             |
| TCTN1;MX:chr12:111070364-111072201:111072268-111074286:111070364-111072475:111072584-111074286:+               | -0.134598706                     | 0.044538616                             |
| ANKMY1;MX:chr2:241439982-241446977:241447108-241452219:241439982-241451278:241451418-241452219:-               | -0.228638854                     | 0.045020881                             |
| OGDH;MX:chr7:44685117-44687043:44687133-44706335:44685117-44687256:44687358-44706335:+                         | 0.202737801                      | 0.045020881                             |
| GSN;MX:chr9:124043840-124045597:124045670-124064241:124043840-124062343:124062404-124064241:+                  | 0.425841873                      | 0.045020881                             |
| PLAGL1;MX:chr6:144263800-144269122:144269597-144285924:144263800-144281606:144281679-144285924:-               | 0.63067294                       | 0.04771488                              |



**Supplementary Table 10.** A list of significant isoform switches (p-value<0.05 & absolute Relative expression median delta>0.1) of event type Retained Intron (RI) found in ESRP1-low versus ESRP-high cell lines using two-sided Wilcoxon test

| Event name                                                                                       | Relative expression median delta | Wilcoxon p-value of relative expression |
|--------------------------------------------------------------------------------------------------|----------------------------------|-----------------------------------------|
| GOLGA8A;RI:chr15:34678826:34678942-34680034:34680153:-                                           | -0.111164525                     | 0.000835477                             |
| KCNK7;RI:chr11:65360326:65360681-65360781:65360854:-                                             | -0.649443823                     | 0.002608443                             |
| EDEM2;RI:chr20:33734628:33734738-33734955:33735161:-                                             | 0.109480022                      | 0.00406519                              |
| ZBTB7B;RI:chr1:154975106:154975162-154975319:154975419:+                                         | 0.148711404                      | 0.00406519                              |
| <b>BICD2;RI:chr9:95473645:95475743-95477535:95477745:-</b>                                       | 0.76577653                       | 0.00406519                              |
| DMAP1;RI:chr1:44679125:44679199-44679381:44679530:+                                              | -0.118309979                     | 0.006154624                             |
| PHYKPL;RI:chr5:177658670:177658867-177659493:177659823:-                                         | 0.188385714                      | 0.006154624                             |
| GYLTL1B;RI:chr11:45944372:45944515-45944609:45944718:+                                           | -0.389167878                     | 0.007526315                             |
| LOC285740;RI:chr6:143882304:143882605-143883022:143883188:-                                      | 0.812021276                      | 0.007632882                             |
| ZNF248;RI:chr10:38117693:38120240-38121953:38122044:-                                            | -0.235256224                     | 0.009166074                             |
| ZNRD1;RI:chr6:30029017:30029175-30029292:30029446:+                                              | -0.181600692                     | 0.009166074                             |
| PIGO;RI:chr9:35091237:35091288-35092540:35092764:-                                               | 0.183379973                      | 0.009166074                             |
| HSPBP1;RI:chr19:55791403:55791476-55791586:55791751:-                                            | 0.254588603                      | 0.009166074                             |
| LINC00623:LINC00869;RI:chr1:144300468:144300755-144301190:144301536:-                            | 0.38338589                       | 0.011117561                             |
| SEPT4;RI:chr17:56599097:56599214-56599328:56599462:-                                             | 0.13159553                       | 0.014697422                             |
| BCKDHB;RI:chr6:81053381:81053529-81055692:81055987:+                                             | -0.229416632                     | 0.016156931                             |
| MYLK-AS1;RI:chr3:123304360:123304400-123304494:123304648:+                                       | 0.622910077                      | 0.020221587                             |
| ZFAND2B;RI:chr2:220071506:220071567-220071692:220071764:+                                        | -0.190281612                     | 0.023103394                             |
| NELL2;RI:chr12:45269598:45269683-45270077:45270274:-                                             | -0.404795933                     | 0.02396768                              |
| FMOS;RI:chr1:146696487:146696658-146696869:146697230:-                                           | -0.315920528                     | 0.026026074                             |
| ZNF154;RI:chr19:58207643:58212513-58212606:58214156:-                                            | -0.546474831                     | 0.027460744                             |
| BZRAP1-AS1;RI:chr17:56414563:56414671-56414809:56415040:+                                        | -0.468826659                     | 0.027460744                             |
| LINC00623:LINC00869;RI:chr1:144298164:144300755-144301350:144301536:-                            | -0.402628549                     | 0.027460744                             |
| PTGES2;RI:chr9:130887523:130887562-130887655:130887720:-                                         | -0.222695225                     | 0.027460744                             |
| ISY1:ISY1-RAB43:RAB43;RI:chr3:128840129:128840335-128840587:128840647:-                          | -0.206176013                     | 0.027460744                             |
| TNFSF12:TNFSF12-TNFSF13:TNFSF13;RI:chr17:7461609:7461692-7462385:7462614:+                       | -0.150420896                     | 0.027460744                             |
| ARHGAP33;RI:chr19:36278070:36278461-36278546:36279724:+                                          | -0.124956562                     | 0.027460744                             |
| PML;RI:chr15:74326819:74326871-74327513:74328735:+                                               | -0.108039905                     | 0.027460744                             |
| NEK1;RI:chr4:170533171:170533294-170533373:170533778:-                                           | 0.118059095                      | 0.027460744                             |
| PHKG2;RI:chr16:30768125:30768280-30771440:30772497:+                                             | 0.122873081                      | 0.027460744                             |
| MDF1;RI:chr6:41606195:41606390-41606477:41606563:+                                               | 0.436917842                      | 0.027806895                             |
| CSTF3;RI:chr11:33162977:33163308-33163431:33163532:-                                             | 0.121510861                      | 0.032509445                             |
| OGG1;RI:chr3:9798451:9798500-9798728:9799089:+                                                   | 0.145419331                      | 0.032509445                             |
| C14orf93;RI:chr14:23467636:23467950-23468263:23468365:-                                          | 0.379700499                      | 0.032509445                             |
| PRRT2;RI:chr16:29824311:29825254-29825654:29827202:+                                             | 0.482658936                      | 0.032509445                             |
| HMGN3;RI:chr6:79910962:79911443-79911993:79912106:-                                              | 0.101720913                      | 0.038333139                             |
| ZNF131;RI:chr5:43161351:43161708-43161811:43162033:+                                             | 0.115763685                      | 0.038333139                             |
| GLYCK;RI:chr3:52326276:52326585-52327062:52327208:+                                              | 0.426321783                      | 0.041563239                             |
| COCH;RI:chr14:31343741:31343797-31344122:31344178:+                                              | -0.299762907                     | 0.048452223                             |
| ANKMY1;MX:chr2:241439982-241446977:241447108-241452219:241439982-241451278:241451418-241452219:- | -0.228638854                     | 0.045020881                             |
| OGDH;MX:chr7:44685117-44687043:44687133-44706335:44685117-44687256:44687358-44706335:+           | 0.202737801                      | 0.045020881                             |
| GSN;MX:chr9:124043840-124045597:124045670-124064241:124043840-124062343:124062404-124064241:+    | 0.425841873                      | 0.045020881                             |
| PLAGL1;MX:chr6:144263800-144269122:144269597-144285924:144263800-144281606:144281679-144285924:- | 0.63067294                       | 0.04771488                              |

**Supplementary Table 11.** A list of significant isoform switches (p-value<0.05 & absolute Relative expression median delta>0.1) of event type Skipping Exon (SE) found in ESRP1-low versus ESRP-high cell lines using two-sided Wilcoxon test

| Event name                                                        | Relative expression median delta | Wilcoxon p-value of relative expression |
|-------------------------------------------------------------------|----------------------------------|-----------------------------------------|
| AP1B1;SE:chr22:29724884-29725701:29725709-29726367:-              | -0.133937491                     | 0.000182811                             |
| AP1B1;SE:chr22:29735122-29735743:29735763-29736645:-              | -0.133937491                     | 0.000182811                             |
| FNIP1;SE:chr5:131044965-131046271:131046354-131052258:-           | 0.389040809                      | 0.000182811                             |
| EXOC7;SE:chr17:74085401-74086410:74086478-74090495:-              | 0.391331548                      | 0.000182811                             |
| TUFT1;SE:chr1:151512902-151534567:151534641-151535061:+           | 0.391396293                      | 0.000182811                             |
| ENAH;SE:chr1:225688772-225692693:225692755-225695653:-            | 0.657639342                      | 0.000182811                             |
| DNM2;SE:chr19:10916643-10919245:10919256-10922940:+               | 0.559104469                      | 0.000237997                             |
| INF2;SE:chr14:105181193-105181621:105181677-105185132:+           | 0.202449373                      | 0.000308535                             |
| NF2;SE:chr22:30077590-30079009:30079053-30090741:+                | 0.383331827                      | 0.000308535                             |
| BBX;SE:chr3:107497366-107508634:107508723-107510087:+             | 0.144383556                      | 0.000398294                             |
| TCF7L2;SE:chr10:114711366-114724315:114724383-114799784:+         | 0.367312525                      | 0.000398294                             |
| BAIAP2;SE:chr17:79082309-79084714:79084759-79089570:+             | 0.55397938                       | 0.000398294                             |
| ANAPC10;SE:chr4:146017263-146018647:146018714-146018840:-         | -0.987521475                     | 0.000512005                             |
| ACOT9;SE:chrX:23751334-23752458:23752484-23754036:-               | -0.734037318                     | 0.000512005                             |
| RALGAPA1;SE:chr14:36008896-36017714:36017744-36018316:-           | -0.695864708                     | 0.000512005                             |
| FGFR10P2;SE:chr12:27110676-27113448:27113561-27116275:+           | -0.396018387                     | 0.000512005                             |
| EDRF1;SE:chr10:127414407-127417572:127417673-127417927:+          | 0.142933282                      | 0.000512005                             |
| ZMYND8;SE:chr20:45839542-45841287:45841370-45848909:-             | 0.147218276                      | 0.000512005                             |
| USO1;SE:chr4:76687826-76681747:76681758-76691592:+                | 0.270316964                      | 0.000512005                             |
| USO1;SE:chr4:76715054-76716489:76716509-76720775:+                | 0.270316964                      | 0.000512005                             |
| <b>CCDC50;SE:chr3:191087825-191092851:191093378-191097948:+</b>   | 0.629026305                      | 0.000512005                             |
| FLNB;SE:chr3:58124256-58127585:58127623-58128377:+                | 0.741290951                      | 0.000512005                             |
| EXOC7;SE:chr17:74086478-74087224:74087316-74090495:-              | -0.548470749                     | 0.000655415                             |
| CD46;SE:chr1:207959027-207963598:207963690-20796684:+             | -0.347494203                     | 0.000655415                             |
| LAS1L;SE:chrX:64752510-64753490:64753615-64754360:-               | -0.185716108                     | 0.000655415                             |
| SPTAN1;SE:chr9:131353904-131355262:131355321-131356454:+          | 0.285058842                      | 0.000655415                             |
| EXOC7;SE:chr17:74085401-74086410:74086562-74087224:-              | 0.494788447                      | 0.000655415                             |
| CTNND1;TMX2:CTNND1;SE:chr11:57529518-57556509:57556627-57558857:+ | -0.6541129589                    | 0.000835477                             |
| PLEKHA1;SE:chr10:124186547-124187792:124187936-124189140:+        | -0.214943297                     | 0.000835477                             |
| VPS39;SE:chr15:42483758-42484264:42484296-42492094:-              | 0.200046413                      | 0.000835477                             |
| EXOC7;SE:chr17:74085401-74086410:74086478-74087224:-              | 0.23576799                       | 0.000835477                             |
| <b>LRRFIP2;SE:chr3:37125297-37132958:37133029-37136283:-</b>      | -0.768922653                     | 0.001060553                             |
| ACLY;SE:chr17:40049427-40052873:40052902-40054002:-               | 0.142629253                      | 0.001060553                             |
| MBNL1;SE:chr3:152163328-152164493:152164546-152165409:+           | 0.186962726                      | 0.001060553                             |
| ADAM15;SE:chr1:155033308-155034380:155034451-155034721:+          | 0.216448172                      | 0.001060553                             |
| MARK2;SE:chr11:63670630-63671458:63671619-63672258:+              | 0.358839902                      | 0.001060553                             |
| NUMB;SE:chr14:73744001-73745989:73746132-73749067:-               | 0.420290113                      | 0.001060553                             |
| FLNB;SE:chr3:58124256-58127585:58127656-58128377:+                | 0.471997074                      | 0.001060553                             |
| MYOF;SE:chr10:95148911-95152674:95152712-95155899:-               | -0.764377125                     | 0.001340641                             |
| YBX3;SE:chr12:10856747-10862507:10862713-10865810:-               | -0.265680704                     | 0.001340641                             |
| APLP2;SE:chr11:129992408-129993507:129993674-129996595:+          | 0.113567446                      | 0.001340641                             |
| RPS24;SE:chr10:79797062-79797723:79797740-79799962:+              | 0.186548782                      | 0.001340641                             |
| TCF12;SE:chr15:57543621-57544619:57544690-57545460:+              | 0.30439451                       | 0.001340641                             |
| RRP12;SE:chr10:99148381-99150180:99150296-99155975:-              | 0.383398658                      | 0.001340641                             |
| MAP3K7;SE:chr6:91246120-91254271:91254351-91256977:-              | 0.549053122                      | 0.001340641                             |
| IMPDH1;SE:chr7:128040593-128040886:128040945-128041069:-          | 0.631416405                      | 0.001340641                             |
| MYH14;SE:chr19:50726606-50727411:50727434-50728842:+              | 0.2949388                        | 0.001524379                             |
| RGL2;SE:chr6:33264892-33266232:33266428-33266647:-                | -0.514662652                     | 0.001687636                             |
| ZEB1;SE:chr10:31750166-31784708:31784767-31791276:+               | -0.441216963                     | 0.001687636                             |
| MYO18A;SE:chr17:27409456-27412622:27412666-27413456:-             | -0.399404557                     | 0.001687636                             |
| MLPH;SE:chr2:238449176-238449445:238449600-238451210:+            | 0.135263217                      | 0.001687636                             |
| DEPDC1;SE:chr1:68947295-68947729:68948580-68949633:-              | 0.513987002                      | 0.001687636                             |
| CTNND1;TMX2:CTNND1;SE:chr11:57582972-57583387:57583473-57583769:+ | 0.709319422                      | 0.001687636                             |
| CACNA1G;SE:chr17:48696369-48697044:48697187-48701268:+            | 0.145897765                      | 0.001707806                             |
| CACNA1G;SE:chr17:48696369-48697044:48697187-48699021:+            | 0.636505139                      | 0.001707806                             |
| GIT2;SE:chr12:110377052-110383065:110383154-110385061:-           | -0.550557788                     | 0.002115607                             |
| ABI1;SE:chr10:27040712-27047991:27048167-27054147:-               | -0.531196234                     | 0.002115607                             |
| GSE1;SE:chr16:85647004-85667520:85667738-85682158:+               | -0.349155388                     | 0.002115607                             |
| NF1;SE:chr17:29576137-29579956:29580018-29585362:+                | -0.309725616                     | 0.002115607                             |
| DCAF6;SE:chr1:167974031-167985019:167985189-167992226:+           | -0.201068213                     | 0.002115607                             |
| LAS1L;SE:chrX:64744142-64744444:64744494-64744845:-               | -0.162669274                     | 0.002115607                             |
| SEC31A;SE:chr4:83750211-83763293:83763634-83765539:-              | 0.171024215                      | 0.002115607                             |
| KRAS;SE:chr12:25362845-25368371:25368494-25378548:-               | 0.207236244                      | 0.002115607                             |
| MYEOV;SE:chr11:69062043-69062700:69062962-69063059:+              | 0.215960215                      | 0.002115607                             |
| PCYT2;SE:chr17:79864774-79865080:79865133-79865430:-              | 0.527557912                      | 0.002115607                             |
| RALGPS2;SE:chr1:178858831-178861365:178861442-178863054:+         | 0.650124788                      | 0.002115607                             |
| FAM20A;SE:chr17:66551884-66586265:66586490-66596404:-             | 0.166093653                      | 0.002199647                             |
| MARK3;SE:chr14:103958371-103964839:103964865-103966493:+          | -0.764570226                     | 0.002641098                             |
| LMO7;SE:chr13:76427524-76429396:76429504-76430642:+               | -0.228666311                     | 0.002641098                             |
| MLPH;SE:chr2:238427291-238428553:238428672-238434244:+            | 0.158644369                      | 0.002641098                             |
| RHNO1;SE:chr12:2986448-2994429:2994700-2997077:+                  | -0.587995902                     | 0.003283461                             |
| NF2;SE:chr22:30077590-30079009:30079068-30090741:+                | 0.21309265                       | 0.003283461                             |
| TCF7L2;SE:chr10:114919751-114920378:114920450-114925314:+         | 0.364670266                      | 0.003283461                             |
| YAP1;SE:chr11:102076817-102080248:102080295-102094353:+           | 0.364724759                      | 0.003283461                             |
| FGFR1;SE:chr8:38287466-38297824:38297891-38314874:-               | 0.119521583                      | 0.003823531                             |
| TMEM51;SE:chr1:15479280-15536986:15537058-15541391:+              | -0.365248143                     | 0.00406519                              |
| PRMT2;SE:chr21:48055675-48056351:48056459-48056808:+              | -0.210156704                     | 0.00406519                              |
| MPRIP;SE:chr17:17083402-17083921:17083983-17088137:+              | -0.163790189                     | 0.00406519                              |

**Supplementary Table 11.** A list of significant isoform switches ( $p$ -value $<0.05$  & absolute Relative expression median  $\Delta > 0.1$ ) of event type Skipping Exon (SE) found in ESRP1-low versus ESRP-high cell lines using two-sided Wilcoxon test -Continued

| Event name                                                               | Relative expression median $\Delta$ | Wilcoxon p-value of relative expression |
|--------------------------------------------------------------------------|-------------------------------------|-----------------------------------------|
| ARNT;SE:chr1:150812130-150814900:150814944-150818739:-                   | -0.152491891                        | 0.00406519                              |
| LRR14;SE:chr8:145743425-145744133:145744199-145744999:+                  | 0.292190981                         | 0.00406519                              |
| TCF7L2;SE:chr10:114917828-114920378:114920450-114925314:+                | 0.387017841                         | 0.00406519                              |
| SMARCC2;SE:chr12:56557549-56558087:56558152-56558432:-                   | 0.500084469                         | 0.00406519                              |
| PDGFA;SE:chr7:538211-540068:540136-540753:-                              | 0.592310779                         | 0.00406519                              |
| VMO1;SE:chr17:4688954-4689196:4689347-4689453:-                          | 0.495093924                         | 0.004800929                             |
| C12orf43;SE:chr12:121444197-121448621:121448729-121448907:-              | -0.155176533                        | 0.005012287                             |
| RSPH4A;SE:chr6:116949532-116950730:116950865-116951598:+                 | -0.14832493                         | 0.005012287                             |
| ATP1A1-AS1;SE:chr1:116948770-116953883:116953937-116961081:-             | -0.140067995                        | 0.005012287                             |
| ARPC4:ARPC4-TTL3:TTL3;SE:chr3:9855029-9857758:9857886-9859329:+          | -0.129793831                        | 0.005012287                             |
| PRC1;SE:chr15:91510432-91512309:91512350-91512677:-                      | -0.121577577                        | 0.005012287                             |
| SGOL1;SE:chr3:20212724-20215741:20216547-20218093:-                      | 0.105604152                         | 0.005012287                             |
| CDCA7L;SE:chr7:21956512-21979880:21979933-21985399:-                     | 0.111643288                         | 0.005012287                             |
| MAP3K4;SE:chr6:161518208-161519310:161519459-161522924:+                 | 0.126824618                         | 0.005012287                             |
| CTAGE5;SE:chr14:39788495-39790132:39790260-39796068:+                    | 0.163976566                         | 0.005012287                             |
| ZDHH16;SE:chr10:99213420-99213556:99213603-99214471:+                    | 0.213309104                         | 0.005012287                             |
| YAP1;SE:chr11:102076805-102080248:102080295-102094353:+                  | 0.25196656                          | 0.005012287                             |
| GPR126;SE:chr6:142703156-142704897:142704980-142711395:+                 | 0.328356498                         | 0.005012287                             |
| SLC37A4;SE:chr11:118900274-118900942:118901445-118901559:-               | 0.38055761                          | 0.005012287                             |
| SEC31A;SE:chr4:83750211-83763338:83763634-83765539:-                     | 0.433071205                         | 0.005012287                             |
| ZNF177;ZNF559;ZNF559-ZNF177;SE:chr19:9435456-9448472:9448693-9449170:+   | -0.408862283                        | 0.005286959                             |
| MPP2;SE:chr17:41960723-41975630:41975748-41981798:-                      | -0.129327508                        | 0.005362948                             |
| ST6GALNAC1;SE:chr17:74625793-74633682:74633818-74639590:-                | -0.25411736                         | 0.005478553                             |
| CTNND1:TMX2:CTNND1;SE:chr11:57529518-57556509:57556627-57558966:+        | -0.688235171                        | 0.006154624                             |
| FOSL1;SE:chr11:65660767-65661485:65661587-65664280:-                     | -0.370234628                        | 0.006154624                             |
| OSBPL3;SE:chr7:24901388-24902819:24902911-24903115:-                     | -0.315904213                        | 0.006154624                             |
| FAM92A1;SE:chr8:94722103-94730903:94731016-94738622:+                    | -0.259350112                        | 0.006154624                             |
| SENP7;SE:chr3:101212812-101219914:101219963-101231935:-                  | -0.228048895                        | 0.006154624                             |
| SRSF3;SE:chr6:36566760-36567598:36568053-36568929:+                      | 0.100465746                         | 0.006154624                             |
| ATP11C;SE:chrX:138811121-138813810:138813914-138820075:-                 | 0.11474393                          | 0.006154624                             |
| ERBB2IP;SE:chr5:65350779-65364705:65364848-65370852:+                    | 0.235793562                         | 0.006154624                             |
| RCCD1;SE:chr15:91498178-91499030:91499113-91499842:+                     | 0.367733393                         | 0.006154624                             |
| EXOC1;SE:chr4:56750094-56755054:56755098-56756389:+                      | 0.374289109                         | 0.006154624                             |
| CHN2;SE:chr7:29539656-29544360:29544437-29548917:+                       | -0.424300302                        | 0.006435091                             |
| SHOX2;SE:chr3:157820675-157822847:157822918-157823468:-                  | 0.180940001                         | 0.006840858                             |
| OLFML3;SE:chr1:114522252-114522597:114522748-114522954:+                 | -0.440502627                        | 0.007371168                             |
| NFYA;SE:chr6:41046903-41048550:41048636-41051785:+                       | -0.512882452                        | 0.007526315                             |
| ZEB1;SE:chr10:31750166-31784705:31784767-31791276:+                      | -0.403904771                        | 0.007526315                             |
| MBNL1;SE:chr3:152165562-152173331:152173366-152174056:+                  | -0.256266451                        | 0.007526315                             |
| BCL6;SE:chr3:187443417-187444519:187444686-187446148:-                   | -0.123125876                        | 0.007526315                             |
| BCS1L;SE:chr2:219524466-219524760:219524968-219525662:+                  | 0.173528528                         | 0.007526315                             |
| MAP4K4;SE:chr2:102476326-102477287:102477448-102481392:+                 | 0.18043249                          | 0.007526315                             |
| RAI14;SE:chr5:34812313-34813679:34813765-34814688:+                      | 0.292538945                         | 0.007526315                             |
| CHRFAM7A;SE:chr15:30672602-30675522:30675585-30679066:-                  | -0.687996674                        | 0.00808577                              |
| NR3C2;SE:chr4:149073764-149075702:149076052-149115897:-                  | 0.203190505                         | 0.008234191                             |
| LIMCH1;SE:chr4:41621457-41640949:41640984-41646517:+                     | -0.370665888                        | 0.008730257                             |
| DIO2;SE:chr14:80672078-80672574:80672681-80677594:-                      | 0.294201239                         | 0.008730257                             |
| ZNF286A;SE:chr17:15603091-15603449:15603680-15604466:+                   | -0.357615716                        | 0.009166074                             |
| GOLGA4;SE:chr3:37292975-37315027:37315092-37323449:+                     | -0.320863168                        | 0.009166074                             |
| ARHGAP17;SE:chr16:24946960-24950685:24950918-24953308:-                  | -0.2484795                          | 0.009166074                             |
| ABI1;SE:chr10:27040712-27047991:27048164-27054147:-                      | -0.128391652                        | 0.009166074                             |
| INTS9;SE:chr8:28695293-28704264:28704326-28707770:-                      | 0.106548076                         | 0.009166074                             |
| MPZL1;SE:chr1:167742605-167745301:167745403-167757057:+                  | 0.125317912                         | 0.009166074                             |
| DDR1;SE:chr6:30852487-30853402:30853457-30856465:+                       | 0.173719924                         | 0.009166074                             |
| LOC100506990;SE:chr8:12302403-12355092:12355358-12388452:+               | 0.18615473                          | 0.009166074                             |
| FKBP14;SE:chr7:30058739-30059829:30059920-30062281:-                     | 0.187397546                         | 0.009166074                             |
| ARHGAP8:PRR5:PRR5-ARHGAP8;SE:chr22:45204318-45204886:45204978-45210552:+ | 0.215754659                         | 0.009166074                             |
| GOLGA4;SE:chr3:37376657-37378634:37378654-37379157:+                     | 0.320863168                         | 0.009166074                             |
| GOLGA4;SE:chr3:37396678-37402734:37402796-37407571:+                     | 0.320863168                         | 0.009166074                             |
| EML1;SE:chr14:100331983-100341268:100341324-100344822:+                  | 0.458376457                         | 0.009847166                             |
| FOXP2;SE:chr7:114174761-114178381:114178438-114210862:+                  | 0.488530244                         | 0.010587137                             |
| SYTL2;SE:chr11:85425550-85428526:85428573-85429833:-                     | -0.689471504                        | 0.011117561                             |
| SPHK2;SE:chr19:49123810-49129325:49129619-49130949:+                     | -0.640419498                        | 0.011117561                             |
| IRF3;SE:chr19:50166771-50167700:50167930-50168888:-                      | -0.242207741                        | 0.011117561                             |
| PIGN;SE:chr18:59828618-59829486:59829562-59830764:-                      | -0.233414343                        | 0.011117561                             |
| NRM;SE:chr6:30656719-30657053:30657229-30657824:-                        | -0.208722334                        | 0.011117561                             |
| NEK1;SE:chr4:170429482-170429920:170430003-170458960:-                   | -0.15884497                         | 0.011117561                             |
| GK;SE:chrX:30714800-30715849:30715866-30718531:+                         | -0.15860476                         | 0.011117561                             |
| SLC9A8;SE:chr20:48466217-48467347:48467381-48471975:+                    | 0.126466122                         | 0.011117561                             |
| BAZ2B;SE:chr2:160269056-160284452:160284553-160284822:-                  | 0.131498099                         | 0.011117561                             |
| ERBB2IP;SE:chr5:65350779-65370852:65371058-65372144:+                    | 0.144157667                         | 0.011117561                             |
| MRPL5;SE:chr1:228296019-228296656:228296722-228296962:-                  | 0.346320211                         | 0.011117561                             |
| SMPD4;SE:chr2:130930468-130930852:130930927-130932487:-                  | 0.74152181                          | 0.011117561                             |
| SERINC5;SE:chr5:79409448-79410337:79410474-79441913:-                    | 0.996763161                         | 0.011117561                             |
| CHN2;SE:chr7:29394279-29407548:29407603-29433295:+                       | 0.167448835                         | 0.011159425                             |
| DDC;SE:chr7:50571757-50596906:50597040-50605558:-                        | 0.831556937                         | 0.011412036                             |
| OGDHL;SE:chr10:50960786-50964822:50964992-50966435:-                     | -0.511699148                        | 0.01144592                              |
| RCAN3;SE:chr1:24841057-24857708:24857881-24861583:+                      | -0.67445773                         | 0.012334708                             |

**Supplementary Table 11.** A list of significant isoform switches ( $p$ -value $<0.05$  & absolute Relative expression median  $\Delta > 0.1$ ) of event type Skipping Exon (SE) found in ESRP1-low versus ESRP-high cell lines using two-sided Wilcoxon test -Continued

| Event name                                                                      | Relative expression median delta | Wilcoxon p-value of relative expression |
|---------------------------------------------------------------------------------|----------------------------------|-----------------------------------------|
| NR5A2;SE:chr1:199997039-200008786:200008923-200012902:+                         | -0.561096821                     | 0.012429351                             |
| ZNF177;ZNF559;ZNF559-ZNF177;SE:chr19:9435456-9448472:9448534-9449170:+          | -0.221972955                     | 0.012554919                             |
| FGFR1;SE:chr8:38285953-38287200:38287466-38314874:-                             | 0.192833675                      | 0.012554919                             |
| FGFR1;SE:chr8:38315052-38318614:38318773-38325190:-                             | 0.241857936                      | 0.012554919                             |
| ERICH5;SE:chr8:99076955-99101304:99102257-99105449:+                            | 0.171872711                      | 0.012606357                             |
| IFI27;SE:chr14:94577143-94577971:94578119-94581197:+                            | 0.25744471                       | 0.012731364                             |
| LOC285740;SE:chr6:143876367-143878668:143878878-143879136:-                     | -0.799821742                     | 0.012738072                             |
| SORBS2;SE:chr4:186599976-186605908:186606000-186696381:-                        | 0.677584414                      | 0.012738072                             |
| RPH3AL;SE:chr17:177370-183550:183725-202503:-                                   | -0.426155033                     | 0.013429696                             |
| LOXL3;SE:chr2:74763598-74763836:74764055-74776496:-                             | -0.32583428                      | 0.013429696                             |
| SYNRG;SE:chr17:35936516-35937478:35937711-35944756:-                            | -0.207226193                     | 0.013429696                             |
| TCF7L2;SE:chr10:114917828-114918426:114918476-114925314:+                       | -0.156612688                     | 0.013429696                             |
| SPAG9;SE:chr17:49052308-49053224:49053262-49054469:-                            | -0.114960985                     | 0.013429696                             |
| ARMC2;SE:chr6:109175688-109179402:109179474-109190027:+                         | 0.189668733                      | 0.013429696                             |
| ELMOD3;SE:chr2:85582293-85582678:85582721-85584090:+                            | 0.220595618                      | 0.013429696                             |
| PAX6;SE:chr11:31823324-31823419:31823460-31824252:-                             | 0.340800865                      | 0.013429696                             |
| SEC61A2;SE:chr10:12204288-12209752:12209892-12211257:+                          | 0.399493364                      | 0.013429696                             |
| ELN;SE:chr7:73459623-73460518:73460547-73461026:+                               | -0.110862531                     | 0.013554666                             |
| LINC00960;SE:chr3:75725031-75725119:75725279-75727984:+                         | 0.345819149                      | 0.014171388                             |
| FXYD2;FXYD6;FXYD6-FXYD2;SE:chr11:117714921-117728926:117729001-117747307:-      | 0.401866641                      | 0.014305878                             |
| P2RX2;SE:chr12:133196160-133196265:133196336-133196430:+                        | 0.417530264                      | 0.014305878                             |
| FXYD2;FXYD6;FXYD6-FXYD2;SE:chr11:117713496-117714825:117714921-117728926:-      | 0.422914071                      | 0.014305878                             |
| BDNF;SE:chr11:27680132-27680367:27680473-27721711:-                             | 0.268044499                      | 0.014886724                             |
| LIMCH1;SE:chr4:41668683-41672735:41672809-41673571:+                            | 0.325153576                      | 0.014886724                             |
| TPPP3;SE:chr16:67425020-67426850:67426940-67427283:-                            | 0.102277199                      | 0.014982894                             |
| SUGCT;SE:chr7:40535985-40723655:40723732-40789033:+                             | 0.192215565                      | 0.015806775                             |
| GPR56;SE:chr16:57662714-57675503:57675620-57684165:+                            | -0.566395547                     | 0.016156931                             |
| CP;SE:chr3:148903233-148904307:148904519-148905839:-                            | -0.498816963                     | 0.016156931                             |
| ABI1;SE:chr10:27044670-27047991:27048164-27054147:-                             | -0.388858593                     | 0.016156931                             |
| NUMB;SE:chr14:73763993-73783098:73783130-73789838:-                             | -0.283208473                     | 0.016156931                             |
| ABCB9;SE:chr12:123424831-123425354:123425542-123428938:-                        | -0.201768344                     | 0.016156931                             |
| TSPAN4;SE:chr11:842915-847201:847300-850288:+                                   | -0.198424878                     | 0.016156931                             |
| ARMCX5;ARMCX5-GPRASP2;GPRASP2;SE:chrX:101967480-101968019:101968145-101968710:+ | -0.191193325                     | 0.016156931                             |
| SNRK;SE:chr3:43328167-43341246:43341307-43344590:+                              | -0.166984601                     | 0.016156931                             |
| HSF2;SE:chr6:122744831-122749048:122749101-122752575:+                          | -0.149235972                     | 0.016156931                             |
| BZRAP1-AS1;SE:chr17:56415040-56423641:56423704-56429096:+                       | -0.130071598                     | 0.016156931                             |
| CPNE1-RBM12;SE:chr20:34220845-34243124:34243266-34246852:-                      | -0.123039076                     | 0.016156931                             |
| BBC3;SE:chr19:47730011-47731415:47731703-47735772:-                             | 0.132788215                      | 0.016156931                             |
| DCAF6;SE:chr1:167974031-167992226:167992285-168007609:+                         | 0.159079302                      | 0.016156931                             |
| CACNA2D2;SE:chr3:50407811-50410496:50410516-50412168:-                          | 0.19534971                       | 0.016156931                             |
| ELK1;SE:chrX:47500874-47509320:47509425-47509822:-                              | 0.205286043                      | 0.016156931                             |
| PDE4DIP;SE:chr1:144868172-144871696:144871881-144873877:-                       | 0.206743123                      | 0.016156931                             |
| EPB41;SE:chr1:29379824-29385101:29385157-29386934:+                             | 0.207996934                      | 0.016156931                             |
| LMF1;SE:chr16:981793-983991:984145-984244:-                                     | 0.400131448                      | 0.016156931                             |
| SLC37A2;SE:chr11:124955914-124956100:124956156-124958015:+                      | 0.784554439                      | 0.016156931                             |
| ZSCAN31;SE:chr6:28295310-28297080:28297555-28303607:-                           | 0.793821561                      | 0.016156931                             |
| FLNC;SE:chr7:128489632-128490030:128490128-128490438:+                          | -0.369421683                     | 0.016762336                             |
| PILRA;SE:chr7:99972056-99987511:99987729-99995502:+                             | 0.814575579                      | 0.016762336                             |
| MUC1;SE:chr1:155159850-155159931:155160020-155160198:-                          | -0.850443762                     | 0.017694795                             |
| LEF1;SE:chr4:108969907-108984779:108984819-108985492:-                          | -0.129483655                     | 0.017960478                             |
| CACNA1G;SE:chr17:48669453-48672354:48672422-48673923:+                          | 0.609939378                      | 0.018204132                             |
| MAGEA2;MAGEA2B;SE:chrX:151883171-151883568:151883646-151884446:+                | 0.361463773                      | 0.018770972                             |
| IRF4;SE:chr6:405130-406766:406899-407455:+                                      | 0.184813304                      | 0.019016474                             |
| COLEC11;SE:chr2:3660972-3673604:3673682-3685123:+                               | 0.124460842                      | 0.019172485                             |
| APITD1;APITD1-CORT;CORT;SE:chr1:10491458-10494714:10494747-10500404:+           | -0.757049262                     | 0.019359467                             |
| SMAD9;SE:chr13:37439895-37441410:37441520-37446795:-                            | -0.560871443                     | 0.019359467                             |
| PPIL6;SE:chr6:109721373-109724234:109724311-109740390:-                         | -0.310597616                     | 0.019359467                             |
| KGFLP1;SE:chr9:46688114-46698075:46698184-46744177:+                            | -0.27585062                      | 0.019359467                             |
| ACAD11;NPHP3;NPHP3-ACAD11;SE:chr3:132416206-132418197:132418294-132418762:-     | -0.233084003                     | 0.019359467                             |
| MXRA7;SE:chr17:7467961-74679929:74680009-74681154:-                             | -0.204772648                     | 0.019359467                             |
| POMT1;SE:chr9:134378460-134381501:134381607-134381790:+                         | -0.166755525                     | 0.019359467                             |
| ACSF2;SE:chr17:48538233-48538603:48538731-48538994:+                            | -0.152444484                     | 0.019359467                             |
| IFNLR1;SE:chr1:24484381-24485542:24485672-24485964:-                            | -0.150057862                     | 0.019359467                             |
| RTN3;SE:chr11:63472379-63486174:63488504-63517463:+                             | -0.124697552                     | 0.019359467                             |
| CKLF;CKLF-CMTM1;CMTM1;SE:chr16:66592251-66597025:66597120-66599789:+            | -0.120860349                     | 0.019359467                             |
| LTBP1;SE:chr2:33540336-33567905:33568030-33572434:+                             | 0.146440996                      | 0.019359467                             |
| ARHGAP12;SE:chr10:32120728-32128565:32128639-32132389:-                         | 0.207465981                      | 0.019359467                             |
| THTPA;SE:chr14:24025552-24025952:24026243-24027904:+                            | 0.279453776                      | 0.019359467                             |
| INPP5J;SE:chr22:31520892-31521819:31521996-31522362:+                           | 0.412417354                      | 0.019359467                             |
| BCL2L12;SE:chr19:50172194-50172281:50172421-50176955:+                          | 0.831384085                      | 0.019359467                             |
| TMPRSS4;SE:chr11:117985642-117985853:117985995-117988020:+                      | 0.148721737                      | 0.019517481                             |
| NCAM1;SE:chr11:113092047-113101918:113101995-113102367:+                        | 0.429883257                      | 0.019630657                             |
| TMEM130;SE:chr7:98457961-98460718:98461023-98467400:-                           | -0.21719077                      | 0.020136752                             |
| CASP5;SE:chr11:104872928-104874001:104874110-104877810:-                        | 0.400729763                      | 0.020136752                             |
| SLC15A3;SE:chr11:60707110-60708594:60708762-60709507:-                          | -0.187089816                     | 0.02121768                              |
| CHN2;SE:chr7:29234606-29332541:29332579-29394241:+                              | -0.285104659                     | 0.021966365                             |
| PDE4B;SE:chr1:66379039-66384280:66384518-66713143:+                             | 0.446621474                      | 0.022740296                             |
| TBC1D23;SE:chr3:100029386-100030677:100030721-100034943:+                       | -0.328198396                     | 0.023103394                             |

**Supplementary Table 11.** A list of significant isoform switches (p-value<0.05 & absolute Relative expression median delta>0.1) of event type Skipping Exon (SE) found in ESRP1-low versus ESRP-high cell lines using two-sided Wilcoxon test **-Continued**

| Event name                                                        | Relative expression median delta | Wilcoxon p-value of relative expression |
|-------------------------------------------------------------------|----------------------------------|-----------------------------------------|
| ARPC4;ARPC4-TTLL3:TTLL3;SE:chr3:9859443-9860239:9860604-9862230:+ | -0.177704087                     | 0.023103394                             |
| QTRTD1;SE:chr3:113775711-113775846:113775953-113784084:+          | -0.143569249                     | 0.023103394                             |
| NAE1;SE:chr16:66860486-66860580:66860683-66864750:-               | -0.114648372                     | 0.023103394                             |
| LINC01128;SE:chr1:764484-783034:783186-787307:+                   | 0.104692283                      | 0.023103394                             |
| ANAPC10;SE:chr4:146017263-146018840:146018912-146019272:-         | 0.108536715                      | 0.023103394                             |
| FAM13A;SE:chr4:89653349-89658623:89658706-89660181:-              | 0.153254856                      | 0.023103394                             |
| LOC101929147;SE:chr1:119683416-119689576-119689692-119693188:+    | 0.213942095                      | 0.023103394                             |
| ADD3;SE:chr10:111890244-111892063:111892158-111893084:+           | 0.386562447                      | 0.023103394                             |
| PLCB4;SE:chr20:9454012-9457364:9457400-9459568:+                  | 0.400634488                      | 0.023103394                             |
| TMEM106A;SE:chr17:41363941-41364224:41364413-41365040:+           | 0.69769942                       | 0.023103394                             |
| FPR1;SE:chr19:52250258-52253456:52253506-52255067:-               | -0.261597146                     | 0.023342202                             |
| WBP5;SE:chrX:102611534-102612011:102612089-102612543:+            | 0.135502281                      | 0.023919348                             |
| LDLRAD1;SE:chr1:54477953-54479909:54480037-54483049:-             | -0.581260181                     | 0.02396768                              |
| MAL;SE:chr2:95691630-95713704:95713871-95715326:+                 | 0.781497093                      | 0.025347319                             |
| CARD16;SE:chr11:104912446-104914210:104914272-104915119:-         | -0.187321168                     | 0.025952456                             |
| ZNF254;SE:chr19:24270139-24288742:24288868-24289350:+             | -0.28360708                      | 0.026387678                             |
| AKR1C2;SE:chr10:5046206-5049599:5049698-5060092:-                 | 0.144578228                      | 0.026387678                             |
| SEMA7A;SE:chr15:74710310-74710609:74710650-74711142:-             | 0.285163112                      | 0.026387678                             |
| SLC44A4;SE:chr6:31842297-31842498:31842623-31842706:-             | 0.364906335                      | 0.026856696                             |
| DDC;SE:chr7:50597040-50605558:50605677-50611583:-                 | 0.614903539                      | 0.026856696                             |
| SORBS1;SE:chr10:97131184-97131741:97131806-97135730:-             | -0.974311941                     | 0.027460744                             |
| JAM3;SE:chr11:134010665-134014136:134014288-134014687:+           | -0.77480879                      | 0.027460744                             |
| SYNC;SE:chr1:33147461-33149611:33149690-33149859:-                | -0.38524637                      | 0.027460744                             |
| NDEL1;SE:chr17:8363478-8366638:8366672-8370248:+                  | -0.337628326                     | 0.027460744                             |
| CD99L2;SE:chrX:149963762-149963891:149963959-149999704:-          | -0.301250958                     | 0.027460744                             |
| ZNF133;SE:chr20:18269248-18286312:18286451-18286942:+             | -0.266591486                     | 0.027460744                             |
| LYRM1;SE:chr16:20912211-20913808:20914039-20926878:+              | -0.20359349                      | 0.027460744                             |
| CBWD1;SE:chr9:135030-146102:146158-152034:-                       | -0.134109922                     | 0.027460744                             |
| ARHGAP33;SE:chr19:36266566-36268547:36268644-36268726:+           | -0.124956562                     | 0.027460744                             |
| KIF21A;SE:chr12:39720126-39724044:39724064-39724548:-             | -0.107917926                     | 0.027460744                             |
| REPS1;SE:chr6:139242261-139247538:139247618-139251114:-           | 0.128605716                      | 0.027460744                             |
| ZFYVE27;SE:chr10:99497078-99498234:99498406-99504486:+            | 0.167898527                      | 0.027460744                             |
| SDCBP2-AS1;SE:chr20:1353822-1355128:1355342-1357442:+             | 0.215355232                      | 0.027460744                             |
| GLYTK;SE:chr3:52321892-52324320:52324735-52324976:+               | 0.226676304                      | 0.027460744                             |
| PRR3;SE:chr6:30525227-30525927:30525989-30529611:+                | 0.230298734                      | 0.027460744                             |
| NFATC2;SE:chr20:50007988-50015180:50015267-50048604:-             | 0.247437428                      | 0.027460744                             |
| ALDH1L1;SE:chr3:125831723-125833400:125833499-125836848:-         | -0.152250532                     | 0.027890529                             |
| ALDH1L1;SE:chr3:125849136-125850227:125850377-125854378:-         | -0.152250532                     | 0.027890529                             |
| COL2A1;SE:chr12:48392214-48393702:48393908-48398020:-             | -0.395608335                     | 0.028351037                             |
| EYA4;SE:chr6:133767892-133769249:133769317-133777694:+            | 0.135308305                      | 0.028351037                             |
| C14orf132;SE:chr14:96505864-96517461:96517559-96552848:+          | 0.265304947                      | 0.028459737                             |
| SORBS2;SE:chr4:186696520-186815451:186815527-186877350:-          | 0.603795715                      | 0.029049022                             |
| CLEC7A;SE:chr12:10278047-10279170:10279307-10280346:-             | -0.259016218                     | 0.030368472                             |
| CLEC7A;SE:chr12:10271189-10275844:10275962-10277896:-             | 0.245335935                      | 0.030368472                             |
| MAPT;SE:chr17:44074030-44087676:44087768-44091609:+               | 0.1993411994                     | 0.030499933                             |
| VMO1;SE:chr17:4688954-4689252:4689347-4689453:-                   | 0.710982154                      | 0.030708373                             |
| CLIC5;SE:chr6:45882284-45888388:45888426-45905142:-               | 0.459632764                      | 0.030753561                             |
| BDNF;SE:chr11:27680132-27681703:27681819-27695607:-               | 0.247329408                      | 0.031228617                             |
| KIF1A;SE:chr2:241689964-241696736:241697011-241697777:-           | 0.26000226                       | 0.031228617                             |
| KIF1A;SE:chr2:241710521-241711987:241712013-241712531:-           | 0.26000226                       | 0.031228617                             |
| TNFSF10;SE:chr3:172224709-172227007:172227111-172232651:-         | 0.443710942                      | 0.031228617                             |
| PAX5;SE:chr9:36840633-36882001:36882102-36923352:-                | -0.523549019                     | 0.031686389                             |
| SEPT4;SE:chr17:56604339-56616473:56616569-56618027:-              | 0.239098545                      | 0.031794861                             |
| HSD11B1L;SE:chr19:5685130-5686427:5686538-5686911:+               | -0.684858542                     | 0.032509445                             |
| DEDD2;SE:chr19:42719404-42720832:42721197-42724226:-              | -0.216895427                     | 0.032509445                             |
| GAB1;SE:chr4:144361535-144378833:144378922-144380538:+            | -0.215261631                     | 0.032509445                             |
| CCSER2;SE:chr10:86237420-86259631:86259715-86273205:+             | -0.193162871                     | 0.032509445                             |
| ZNF107;SE:chr7:64139714-64150777:64150903-64151626:+              | -0.185294955                     | 0.032509445                             |
| SREBF1;SE:chr17:17723835-17726832:17726921-17740041:-             | -0.173474891                     | 0.032509445                             |
| CLK1;SE:chr2:201724469-201724848:201724938-201725961:-            | -0.162021012                     | 0.032509445                             |
| PSMG4;SE:chr6:3263993-3264443:3264559-3267825:+                   | -0.157277148                     | 0.032509445                             |
| LRRC42;SE:chr1:54412222-54413461:54413494-54417659:+              | -0.145199976                     | 0.032509445                             |
| LIN9;SE:chr1:226475498-226483543:226483647-226485420:-            | -0.134556247                     | 0.032509445                             |
| EXOC7;SE:chr17:74085401-74087224:74087316-74090495:-              | -0.133556115                     | 0.032509445                             |
| ETV4;SE:chr17:41622735-41622926:41623036-41623229:-               | -0.119555966                     | 0.032509445                             |
| DNM1;SE:chr9:131013219-131015380:131015416-131016933:+            | 0.133837093                      | 0.032509445                             |
| LRRC75A;SE:chr17:16347445-16351159:16351274-16365572:-            | 0.143571249                      | 0.032509445                             |
| HSH2D;SE:chr19:16259685-16262257:16262388-16263362:+              | 0.149045201                      | 0.032509445                             |
| PPP3CC;SE:chr8:22390531-22396982:22397011-22398128:+              | 0.162024012                      | 0.032509445                             |
| TSNAXIP1;SE:chr16:67848304-67855002:67855128-67858486:+           | 0.171377754                      | 0.032509445                             |
| P4HA2;SE:chr5:131554337-131562779:131562914-131563483:-           | 0.188413144                      | 0.032509445                             |
| INPP4A;SE:chr2:99163157-99165418:99165432-99169249:+              | 0.244058254                      | 0.032509445                             |
| ZNF75A;SE:chr16:3362768-3363049:3363175-3366912:+                 | 0.245471679                      | 0.032509445                             |
| ATG12;SE:chr5:115173461-115176194:115176309-115176515:-           | 0.324100928                      | 0.032509445                             |
| RHOBTB1;SE:chr10:62671310-62695971:62696042-62701562:-            | -0.146658099                     | 0.032524181                             |
| SLC44A3;SE:chr1:95286034-95286505:95286612-95290049:+             | 0.21303629                       | 0.032524181                             |
| FKBP6;SE:chr7:72742695-72743363:72743452-72744153:+               | -0.107147452                     | 0.033006258                             |
| TUSC3;SE:chr8:15605974-15615300:15615364-15621712:+               | 0.326068566                      | 0.033474065                             |

**Supplementary Table 11.** A list of significant isoform switches ( $p$ -value $<0.05$  & absolute Relative expression median delta $>0.1$ ) of event type Skipping Exon (SE) found in ESRP1-low versus ESRP-high cell lines using two-sided Wilcoxon test -Continued

| Event name                                                                  | Relative expression median delta | Wilcoxon p-value of relative expression |
|-----------------------------------------------------------------------------|----------------------------------|-----------------------------------------|
| ELF5;SE:chr11:34511606-34515026:34515259-34527176:-                         | 0.382581709                      | 0.033474065                             |
| ZFR2;SE:chr19:3852612-3855400:3855557-3868963:-                             | -0.348504669                     | 0.033894854                             |
| PLAGL1;SE:chr6:144285955-144287295:144287367-144290044:-                    | -0.230546316                     | 0.033894854                             |
| CASP12;SE:chr11:104761250-104761897:104762131-104763058:-                   | 0.406013034                      | 0.033894854                             |
| PDE9A;SE:chr21:44073993-44106302:44106372-44119078:+                        | 0.226993202                      | 0.034610558                             |
| CADM1;SE:chr11:115049495-115061608:115061661-115069126:-                    | -0.253994656                     | 0.034808479                             |
| CAPS2;SE:chr12:75692560-75692651:75692746-75693617:-                        | -0.312902362                     | 0.036713856                             |
| EMR1;SE:chr19:6896552-6897160:6897315-6897439:+                             | -0.21087184                      | 0.036713856                             |
| MAGEA2:MAGEA2B;SE:chrX:151884565-151885137:151885234-151885385:+            | 0.275057654                      | 0.036713856                             |
| KCNH7;SE:chr2:163361167-163369164:163369184-163374240:-                     | 0.925610851                      | 0.036713856                             |
| CACNA1G;SE:chr17:48697187-48699021:48699155-48701268:+                      | 0.127094199                      | 0.037573552                             |
| TP73;SE:chr1:3646012-3646564:3646712-3647491:+                              | 0.134108394                      | 0.037573552                             |
| C4orf26;SE:chr4:76481794-76488445:76488555-76489324:+                       | 0.999973064                      | 0.037635314                             |
| ZNF286A;SE:chr17:15603091-15603522:15603680-15604466:+                      | -0.505816123                     | 0.038333139                             |
| FCHO1;SE:chr19:17865170-17865401:17865490-17865927:+                        | -0.37816285                      | 0.038333139                             |
| ANKLE1;SE:chr19:17394693-17394898:17395075-17396240:+                       | -0.295002789                     | 0.038333139                             |
| GNPDA2;SE:chr4:44719312-44720326:44720427-44724101:-                        | -0.265541514                     | 0.038333139                             |
| TIMM23B;SE:chr10:51371646-51372579:51372702-51374370:+                      | -0.206948539                     | 0.038333139                             |
| TACC2;SE:chr10:123989001-123989866:123989955-123996910:+                    | -0.192805701                     | 0.038333139                             |
| ASAP1;SE:chr8:131370389-131373916:131374017-131414131:-                     | -0.151496664                     | 0.038333139                             |
| TCF7L2;SE:chr10:114918476-114919679:114919751-114925314:+                   | -0.138290391                     | 0.038333139                             |
| TRIM3;SE:chr11:6486962-6494314:6494478-6495021:-                            | -0.132798361                     | 0.038333139                             |
| BORA;SE:chr13:73303231-73305419:73305525-73300978:+                         | -0.131898954                     | 0.038333139                             |
| RNF146;SE:chr6:127601485-127603432:127603540-127607195:+                    | -0.130931181                     | 0.038333139                             |
| KIAA1958;SE:chr9:115337531-115380151:115380234-115407930:+                  | -0.10311362                      | 0.038333139                             |
| EYA3;SE:chr1:28323889-28324795:28324862-28326471:-                          | -0.100031798                     | 0.038333139                             |
| NUMA1;SE:chr11:71721900-71723447:71723488-71723941:-                        | 0.102862586                      | 0.038333139                             |
| PXK;SE:chr3:58398690-58409188:58409221-58410479:+                           | 0.103695686                      | 0.038333139                             |
| TRA2A;SE:chr7:23561459-23561751:23562051-23571408:-                         | 0.114377237                      | 0.038333139                             |
| FAM86B3P;SE:chr8:8090396-8092005:8092106-8093338:+                          | 0.117094576                      | 0.038333139                             |
| FAM86B3P;SE:chr8:8093471-8093554:8093821-8094648:+                          | 0.117094576                      | 0.038333139                             |
| SYT7;SE:chr11:61300596-61313503:61313727-61318856:-                         | 0.143382318                      | 0.038333139                             |
| MEF2B;MEF2BNB;MEF2B;SE:chr19:19256831-19257082:19257193-19257364:-          | 0.162960964                      | 0.038333139                             |
| ABL2;SE:chr1:179100616-179102447:179102509-179198376:-                      | 0.182985595                      | 0.038333139                             |
| KIFC3;SE:chr16:57792821-57793037:57793065-57793640:-                        | 0.19246881                       | 0.038333139                             |
| IRAK4;SE:chr12:44162075-44165023:44165168-44165983:+                        | 0.203708767                      | 0.038333139                             |
| ZWILCH;SE:chr15:66797729-66801084:66801230-66806326:+                       | 0.254052868                      | 0.038333139                             |
| GSG1;SE:chr12:13241843-13242142:13242210-13243437:-                         | -0.310165846                     | 0.038867104                             |
| HNF4A;SE:chr20:42984493-43019098:43019319-43034698:+                        | -0.267646398                     | 0.038999953                             |
| TOPORS-AS1;SE:chr9:32552477-32565395:32565626-32566389:+                    | 0.243429875                      | 0.039211045                             |
| GPR132;SE:chr14:105523617-105524275:105524364-105531716:-                   | -0.104912059                     | 0.039318369                             |
| VMO1;SE:chr17:4688954-4689232:4689347-4689453:-                             | 0.744675924                      | 0.039318369                             |
| DIO2;SE:chr14:80669631-80671945:80672078-80672574:-                         | 0.380702634                      | 0.039351837                             |
| MAPK10;SE:chr4:87023185-87024339:87024397-87028376:-                        | -0.318583491                     | 0.040423979                             |
| SPRR3;SE:chr1:152974269-152975079:152975162-152975478:+                     | -0.228550802                     | 0.040423979                             |
| KIAA0226L;SE:chr13:46946732-46952025:46952140-46961269:-                    | 0.313489102                      | 0.040423979                             |
| BAGE:BAGE2:BAGE3:BAGE4:BAGE5;SE:chr21:11026839-11029598:11029717-11038728:- | 0.480048675                      | 0.041226833                             |
| PTPRD;SE:chr9:8526644-8527345:8527353-8528591:-                             | -0.159714479                     | 0.043308143                             |
| SPATA9;SE:chr5:94999752-95010390:95010492-95011116:-                        | -0.130414594                     | 0.043308143                             |
| CSE1L-AS1;SE:chr20:47657147-47659687:47659909-47662397:-                    | 1                                | 0.043308143                             |
| SAMD14;SE:chr17:48191670-48191721:48191804-48192928:-                       | 0.462205934                      | 0.043311496                             |
| BEAN1;SE:chr16:66461334-66471498:66471604-66503505:+                        | -0.347926156                     | 0.043975196                             |
| CEACAM1;SE:chr19:43015072-43015728:43015780-43016502:-                      | -0.268829877                     | 0.044538616                             |
| SLC26A11;SE:chr17:78194295-78194718:78194914-78195347:+                     | 0.380940804                      | 0.044538616                             |
| NDUFV2-AS1;SE:chr18:9121454-9132221:9132396-9133389:-                       | 0.668333609                      | 0.044538616                             |
| UNC93A;SE:chr6:167709749-167711433:167711558-167717407:+                    | 0.537122688                      | 0.044609718                             |
| TTC23;SE:chr15:99768937-99775193:99775285-99781570:-                        | -0.225615301                     | 0.045020881                             |
| ECHDC1;SE:chr6:127648289-127651954:127652175-127664481:-                    | -0.18725056                      | 0.045020881                             |
| TMEM126B;SE:chr11:85339732-85342189:85342360-85342731:+                     | -0.182686743                     | 0.045020881                             |
| MVK;SE:chr12:110017751-110019200:110019355-110023827:+                      | -0.114805082                     | 0.045020881                             |
| PRMT5;SE:chr14:23397420-23397706:23397824-23398376:-                        | -0.110380562                     | 0.045020881                             |
| ZNF142;SE:chr2:219515249-219516424:219516545-219520873:-                    | -0.10966334                      | 0.045020881                             |
| C14orf80;SE:chr14:105959071-105960172:105960270-105963694:+                 | 0.133605244                      | 0.045020881                             |
| RAP1GAP2;SE:chr17:2861088-2865964:2866008-2866724:+                         | 0.14396076                       | 0.045020881                             |
| MARK2;SE:chr11:63673586-63675732:63675776-63676349:+                        | 0.173220034                      | 0.045020881                             |
| RASGRP1;SE:chr15:38794622-38795473:38795577-38798041:-                      | 0.181395785                      | 0.045020881                             |
| PPP3CB;SE:chr10:75198178-75199630:75199659-75204483:-                       | 0.212672405                      | 0.045020881                             |
| TMEM106A;SE:chr17:41363941-41364246:41364413-41365040:+                     | 0.216890849                      | 0.045020881                             |
| SORBS1;SE:chr10:97106209-97110966:97111133-97114639:-                       | 0.220183331                      | 0.045020881                             |
| RGL1;SE:chr1:183605636-183666538:183666647-183711261:+                      | 0.236450165                      | 0.045020881                             |
| COPZ1;SE:chr12:54718965-54734247:54734399-54735990:+                        | 0.570368402                      | 0.045020881                             |
| PRDX3;SE:chr10:120933384-120933963:120934104-120938267:-                    | 0.902376823                      | 0.045020881                             |
| C8orf37-AS1;SE:chr8:96281118-96313350:96313420-96444854:+                   | -0.847021373                     | 0.045500264                             |
| GPR56;SE:chr16:57673582-57675503:57675620-57684165:+                        | 0.182572979                      | 0.046539581                             |
| SYTL5;SE:chrX:37865921-37890253:37890343-37892787:+                         | 0.16096463                       | 0.047761243                             |
| SLC4A9;SE:chr5:139745163-139745419:139745607-139745736:+                    | -0.19047349                      | 0.048398223                             |
| HHAT;SE:chr1:210560925-210573812:210574006-210577808:+                      | -0.223042126                     | 0.04841124                              |
| CADM2;SE:chr3:85008819-85775672:85775698-85851197:+                         | 0.504819109                      | 0.049534613                             |
| LINC01518;SE:chr10:43181464-43186024:43186140-43186983:-                    | 0.926619151                      | 0.049534613                             |
